# Supplementary material for: Ni-catalyzed Electrochemical Cross-Electrophile Coupling Paired with Oxygen Evolution Reaction
Source: Research Square preprint supplement (doi:10.21203/rs.3.rs-7763126/v1), 2025-10-21
Supplement: Supplementary file 1 [file ac0c0603590c2520e3998728.pdf]

# **Supporting Information**

## **Ni-catalyzed Electrochemical Cross-Electrophile Coupling Paired with Oxygen Evolution Reaction**

# Contents

|                                                                                                                                                   |     |
|---------------------------------------------------------------------------------------------------------------------------------------------------|-----|
| 1. General Information                                                                                                                            | S3  |
| 2. Detailed Screening of the Reaction Conditions                                                                                                  | S4  |
| 3. General Procedure for Nickel-Catalyzed Electrochemical Reductive Coupling with H <sub>2</sub> O as Sacrificial Reductant in the undivided cell | S9  |
| 4. General Procedure for Nickel-Catalyzed Electrochemical Reductive Coupling with H <sub>2</sub> O as Sacrificial Reductant in the divided cell   | S10 |
| 5. Procedure for Scale-up Reaction                                                                                                                | S11 |
| 6. Control Experiments                                                                                                                            | S12 |
| 7. Cyclic Voltammetry Experiments                                                                                                                 | S13 |
| 8. Analytical Data of Products                                                                                                                    | S16 |
| 9. NMR Spectra of Products                                                                                                                        | S31 |
| 10. References                                                                                                                                    | S76 |

## 1. General Information

Nuclear Magnetic Resonance spectra were recorded on a Bruker Avance 400 MHz or 600MHz instruments at ambient temperature. All  $^1\text{H}$  NMR spectra were measured in part per million (ppm) relative to the signals of tetramethylsilane (TMS, 0.00 ppm) added into the deuterated chloroform ( $\text{CDCl}_3$ , 7.26 ppm) unless otherwise stated. Data for  $^1\text{H}$  NMR were reported as follows: chemical shift, multiplicity (s = singlet, d = doublet, t = triplet, q = quartet, m = multiplet, dd = doublet of doublets, dt = doublet of triplets, td = triplet of doublets), coupling constants, and integration. All  $^{13}\text{C}$  NMR spectra were reported in ppm relative to tetramethylsilane (0.00 ppm) unless otherwise stated, and were obtained with complete  $^1\text{H}$  decoupling. All GC analyses were performed on a Perkin-Elmer Clarus 400 GC system with an FID detector. Chiral HPLC analysis was performed with a Shimadzu HPLC instrument (LC-2030 Plus). High-resolution mass spectra were obtained with an AB Triple 5600 mass spectrometer by ESI on a TOF mass analyzer.

Unless otherwise noted, all chemicals used in the preparations of starting materials and in the nickel catalyzed electroreductive carbonylative reactions were commercially available and were used as received without further purifications or prepared according to previous work. Solvents transferred to the glove box without exposure to air. Anhydrous dimethylacetamide (DMA) (99.9% purity) was purchased from China National Pharmaceutical Group Corporation.

## 2. Detailed Screening of the Reaction Conditions

**Table S1 Electric Current Screening**

| 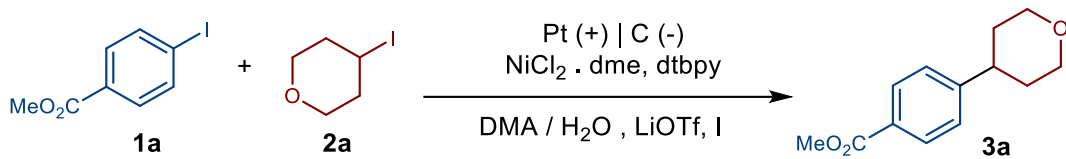 |         |       |
|------------------------------------------------------------------------------------|---------|-------|
| Entry                                                                              | Current | Yield |
| 1                                                                                  | 15 mA   | 39%   |
| 2                                                                                  | 20 mA   | 45%   |
| 3                                                                                  | 25 mA   | 52%   |
| 4                                                                                  | 30 mA   | 66%   |
| 5                                                                                  | 40 mA   | 62%   |
| 6                                                                                  | 50 mA   | 60%   |

Reaction condition: 0.5 mmol **1a**, 0.6 mmol **2a**, 10 mol% NiCl<sub>2</sub>·dme, 15 mol% 4,4'-di-tert-butyl-2,2'-bipyridine, 6 mL DMA, 1.5 mmol. H<sub>2</sub>O, 0.2 M lithium triflate, room temperature, 4 h.

**Table S2 Water Addition Screening**

| 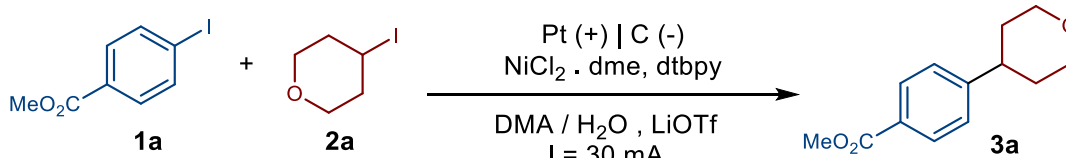 |                    |       |
|--------------------------------------------------------------------------------------|--------------------|-------|
| Entry                                                                                | Water Equivalent   | Yield |
| 1                                                                                    | none               | 37%   |
| 2                                                                                    | 3 eq.              | 66%   |
| 3                                                                                    | 10 eq.             | 78%   |
| 4                                                                                    | 30 eq.             | 86%   |
| 5                                                                                    | 1 mL               | 52%   |
| 6                                                                                    | DMA (Water≤50 ppm) | 3%    |

Reaction condition: 0.5 mmol **1a**, 0.6 mmol **2a**, 10 mol% NiCl<sub>2</sub>·dme, 15 mol% 4,4'-di-tert-butyl-2,2'-bipyridine, 6 mL DMA, 0.2 M lithium triflate, room temperature, 30 mA, 4 h.

**Table S3 Additives Screening**

| 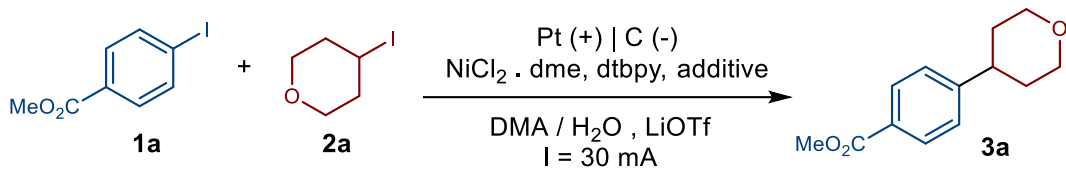 |                                 |            |
|------------------------------------------------------------------------------------|---------------------------------|------------|
| Entry                                                                              | Additive                        | Yield      |
| 1                                                                                  | Na <sub>2</sub> CO <sub>3</sub> | >99% (95%) |
| 2                                                                                  | Cs <sub>2</sub> CO <sub>3</sub> | 88%        |
| 3                                                                                  | NaOH                            | 74%        |
| 4                                                                                  | HCl                             | <50%       |
| 5                                                                                  | NaI                             | <20%       |

Reaction condition: 0.5 mmol **1a**, 0.6 mmol **2a**, 10 mol% NiCl<sub>2</sub>·dme, 15 mol% 4,4'-di-tert-butyl-2,2'-bipyridine, 6 mL DMA, 30 eq. H<sub>2</sub>O, 0.2 M lithium triflate, 20 mol% additive, room temperature, 30 mA, 4 h

**Table S4 Solvent Screening**

| 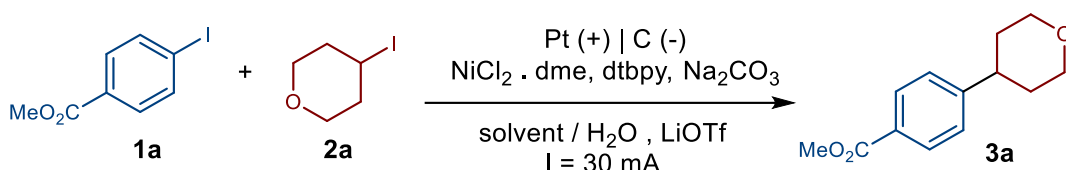 |                    |            |
|--------------------------------------------------------------------------------------|--------------------|------------|
| Entry                                                                                | Solvent            | Yield      |
| 1                                                                                    | DMA                | >99% (95%) |
| 2                                                                                    | DMF                | 53%        |
| 3                                                                                    | NMP                | 35%        |
| 4                                                                                    | CH <sub>3</sub> OH | n.d.       |

Reaction condition: 0.5 mmol **1a**, 0.6 mmol **2a**, 10 mol% NiCl<sub>2</sub>·dme, 15 mol% 4,4'-di-tert-butyl-2,2'-bipyridine, 6 mL solvent, 30 eq H<sub>2</sub>O, 0.2 M lithium triflate, 20 mol% Na<sub>2</sub>CO<sub>3</sub>, room temperature, 30 mA, 4 h.

**Table S5 Electrode Screening**

$\text{1a} + \text{2a} \xrightarrow[\text{DMA / H}_2\text{O, LiOTf, I = 30 mA}]{\text{anodic (+) | cathodic (-), NiCl}_2 \cdot \text{dme, dtbpy, Na}_2\text{CO}_3} \text{3a}$

| Entry | electrode                       | Yield      |
|-------|---------------------------------|------------|
| 1     | Pt (+) C felt (-)               | >99% (95%) |
| 2     | Au (+) C felt (-)               | 53%        |
| 3     | C felt (+) C felt (-)           | 38%        |
| 4     | C plate (+) C felt (-)          | <30%       |
| 5     | IrO <sub>2</sub> (+) C felt (-) | trace      |
| 6     | Pt (+) C plate (-)              | 47%        |
| 7     | Pt (+) Ni foam (-)              | 36%        |
| 8     | Pt (+) Zn foam (-)              | <30%       |
| 9     | Pt (+) Fe foam (-)              | <30%       |

Reaction condition: 0.5 mmol **1a**, 0.6 mmol **2a**, 10 mol% NiCl<sub>2</sub>·dme, 15 mol% 4,4'-di-tert-butyl-2,2'-bipyridine, 6 mL DMA, 30 eq. H<sub>2</sub>O, 0.2 M lithium triflate, 20 mol% Na<sub>2</sub>CO<sub>3</sub>, room temperature, 30 mA, 4 h

**Table S6 Electrode Screening**

$\text{1a} + \text{2a} \xrightarrow[\text{DMA / H}_2\text{O, electrolyte, I = 30 mA}]{\text{Pt (+) | C (-), NiCl}_2 \cdot \text{dme, dtbpy, Na}_2\text{CO}_3} \text{3a}$

| Entry | electrolyte                      | Yield      |
|-------|----------------------------------|------------|
| 1     | LiOTf                            | >99% (95%) |
| 2     | <sup>n</sup> BuNClO <sub>4</sub> | 78%        |
| 3     | <sup>n</sup> BuNPF <sub>6</sub>  | 65%        |
| 4     | <sup>n</sup> BuNBr               | 13%        |
| 5     | <sup>n</sup> BuNOAc              | trace      |
| 5     | <sup>n</sup> BuNI                | trace      |

Reaction condition: 0.5 mmol **1a**, 0.6 mmol **2a**, 10 mol% NiCl<sub>2</sub>·dme, 15 mol% 4,4'-di-tert-butyl-

2,2'bipyridine, 6 mL DMA, 30 eq. H<sub>2</sub>O, 0.2 M electrolyte, 20 mol% Na<sub>2</sub>CO<sub>3</sub>, room temperature, 30 mA, 4 h.

**Table S7 Catalysts Screening**

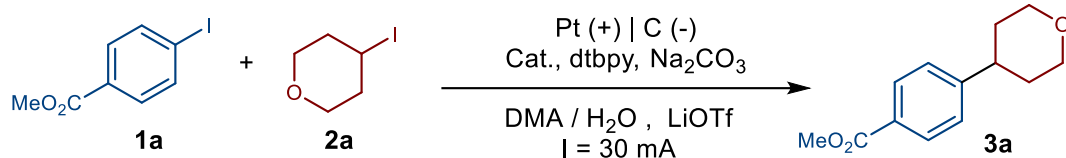

| Entry | Cat.                                    | Yield      |
|-------|-----------------------------------------|------------|
| 1     | NiCl <sub>2</sub> ·dme                  | (95%) >99% |
| 2     | NiBr <sub>2</sub> ·dme                  | 78%        |
| 3     | NiBr <sub>2</sub>                       | 57%        |
| 4     | Ni(OAc) <sub>2</sub> ·4H <sub>2</sub> O | 60%        |
| 5     | NiI <sub>2</sub>                        | 66%        |

Reaction condition: 0.5 mmol **1a**, 0.6 mmol **2a**, 10 mol% Cat., 15 mol% 4,4'-di-tert-butyl-2,2'bipyridine, 6 mL DMA, 30 eq. H<sub>2</sub>O, 0.2 M electrolyte, 20 mol% Na<sub>2</sub>CO<sub>3</sub>, room temperature, 30 mA, 4 h.

**Table S8 Ligand Screening**

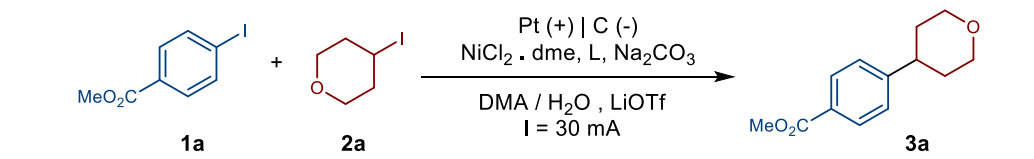

|                                                                                                      |                                                                                            |                                                                                                     |
|------------------------------------------------------------------------------------------------------|--------------------------------------------------------------------------------------------|-----------------------------------------------------------------------------------------------------|
| <br>95%           | <br>49% | <br>57%         |
| <br>45%           | <br>20% | <br>no detected |
| <br>no detected |                                                                                            |                                                                                                     |

Reaction condition: 0.5 mmol **1a**, 0.6 mmol **2a**, 10 mol% NiCl<sub>2</sub>·dme, 15 mol% 4,4'-di-tert-butyl-2,2'bipyridine, 6 mL DMA, 30 eq. H<sub>2</sub>O, 0.2 M electrolyte, 20 mol% additive, room temperature, 30 mA, 4 h.

**Table S9 Reaction time Screening**

| Entry | Time | Yield      |
|-------|------|------------|
| 1     | 1 h  | 36%        |
| 2     | 2 h  | 69%        |
| 3     | 3 h  | 86%        |
| 4     | 4 h  | (95%) >99% |
| 5     | 5 h  | 96%        |
| 6     | 6 h  | 96%        |

Reaction condition: 0.5 mmol **1a**, 0.6 mmol **2a**, 10 mol% NiCl<sub>2</sub>·dme, 15 mol% 4,4'-di-tert-butyl-2,2'-bipyridine, 6 mL DMA, 30 eq. H<sub>2</sub>O, 0.2 M electrolyte, 20 mol% Na<sub>2</sub>CO<sub>3</sub>, room temperature, 30 mA, 4 h.

**Table S10 Control Experiments**

| Entry | Condition                 | Yield        |
|-------|---------------------------|--------------|
| 1     | None                      | 95%          |
| 2     | No NiCl <sub>2</sub> ·dme | No detection |
| 3     | No dtbpy                  | No detection |
| 4     | No current                | No detection |
| 5     | No H <sub>2</sub> O       | 37%          |

Reaction condition: 0.5 mmol **1a**, 0.6 mol **2a**, 10 mol% NiCl<sub>2</sub>·dme, 15 mol% 4,4'-di-tert-butyl-2,2'-bipyridine, 6 mL DMA, 30 eq. H<sub>2</sub>O, 0.2 M LiOTf, 20 mol% Na<sub>2</sub>CO<sub>3</sub>, room temperature, 30 mA, 4 h.



### 3. General Procedure for Nickel-Catalyzed Electrochemical Reductive Coupling with H<sub>2</sub>O as Sacrificial Reductant in the undivided cell

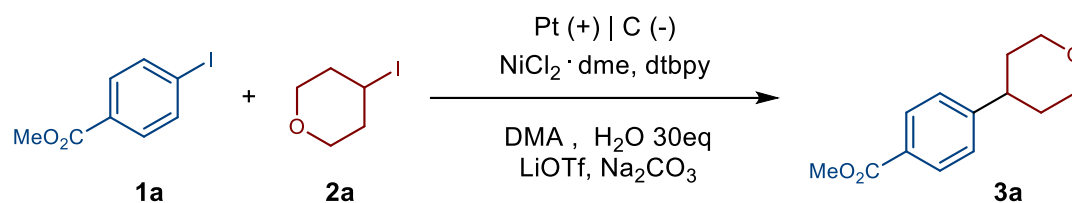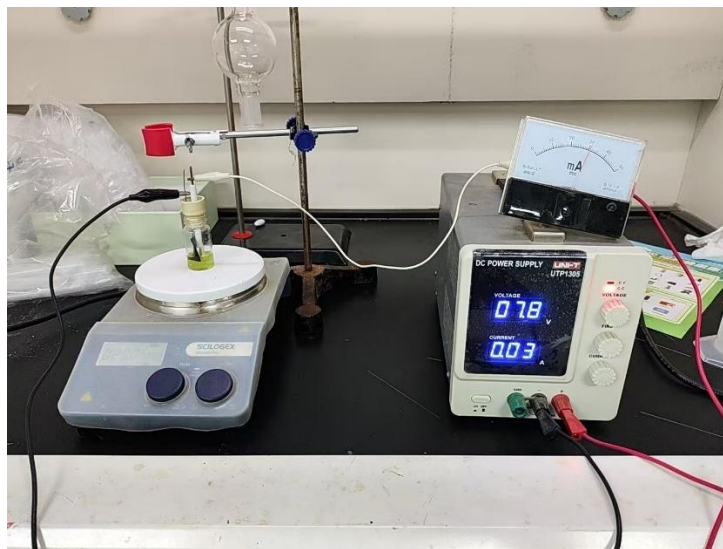

Figure S1. Reaction set-up of undivided cell

An oven-dried 20 mL re-sealable screw-cap test tube equipped with a Teflon-coated magnetic stir bar was sequentially charged with dtbpy (15 mol%), NiCl<sub>2</sub> · dme (10 mol%), LiOTf (0.2 M), Na<sub>2</sub>CO<sub>3</sub> (0.1 mmol), **1a** (0.5 mmol) in the glove. Then DMA (6 mL), **2a** (0.6 mmol), 270 μL pure water were added into the tube in turn. All these procedures were conducted in the glovebox. Screw the vial cap with electrode (Pt anode (10 mm/10 mm/0.5 mm), graphite felt cathode (10 mm/10 mm)) onto the vial to finger tight and adapt the electrochemical cell. Then removed from the glove box. The reaction mixture was stirred and electrolyzed at a constant current (30 mA) at room temperature for 4 h. Then the reaction was quenched with H<sub>2</sub>O, the aqueous layer was extracted with EA. The organic layers were combined, and washed with brine. Dried over Na<sub>2</sub>SO<sub>4</sub>, filtered, and concentrated under reduced pressure. The product was purified by silica gel column chromatography, using petroleum ether/EA = 30/1 (v/v) as an eluent.

#### 4. General Procedure for Nickel-Catalyzed Electrochemical Reductive Coupling with H<sub>2</sub>O as Sacrificial Reductant in the divided cell

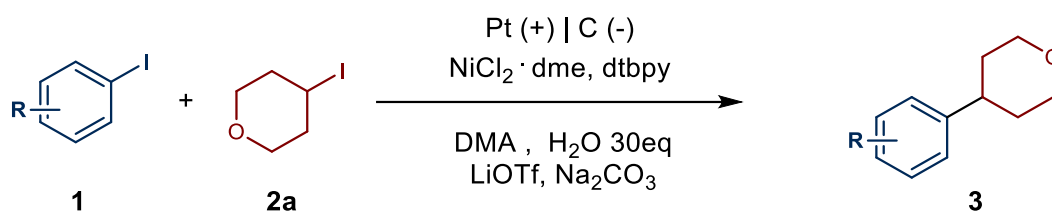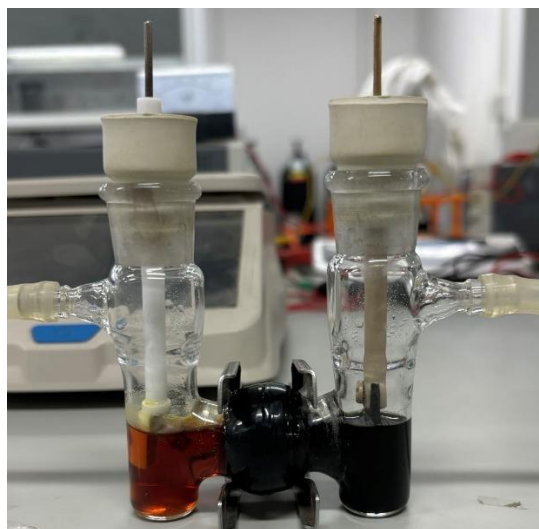

Figure S2. Reaction set-up of divided cell

A divided H-type electrolytic cell was assembled employing an anion exchange membrane as the separator, ensuring airtightness at all interfaces. The anode compartment was charged with an aqueous NaOH solution (0.2 M, 10 mL) and a platinum electrode. The cathode compartment was sequentially charged in a glovebox with dtbpy (15 mol%),  $\text{NiCl}_2 \cdot \text{dme}$  (10 mol%),  $\text{Na}_2\text{CO}_3$  (20 mol%) and LiOTf (0.2 M), DMAc (10 mL), aryl-I (0.5 mmol), and alkyl iodides **2a** (0.6 mmol) were then added. A carbon felt electrode was installed as the cathode. The assembled cell was removed from the glovebox. The reaction mixture was stirred and electrolyzed at a constant current (30 mA) at room temperature for 4 h. Upon completion, the reaction was quenched with  $\text{H}_2\text{O}$  and the aqueous layer was extracted with ethyl acetate (EA). The combined organic layers were washed with brine, dried over  $\text{Na}_2\text{SO}_4$ , filtered, and concentrated under reduced pressure. The crude product was purified by silica gel column chromatography using petroleum ether/EA (5:1, v/v) as the eluent.

## 5. Procedure for Scale-up Reaction

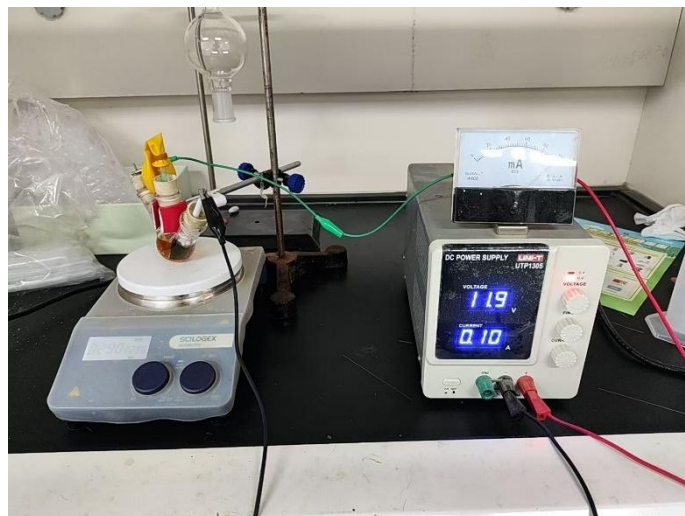

Figure S3. Scale-up reaction set-up

An oven-dried 25 mL three-necked flask equipped with a Teflon-coated magnetic stir bar was sequentially charged with dtbpy (15 mol%),  $\text{NiCl}_2 \cdot \text{dme}$  (10 mol%), LiOTf (0.2 M)  $\text{Na}_2\text{CO}_3$  (2 mmol), **1a** (10 mmol) in the glove. Then DMA (24 mL), **2a** (12 mmol),  $\text{ClCO}_2\text{Pr}$  (15 mmol.), 1mL pure water were added into the tube in turn. All these procedures were conducted in the glovebox. Screw the vial cap with electrode onto the vial to finger tight and adapt the electrochemical cell. Then removed from the glove box. The reaction mixture was stirred and electrolyzed at a constant current (100 mA) at room temperature for overnight. Then the reaction was quenched with  $\text{H}_2\text{O}$ , the aqueous layer was extracted with EA. The organic layers were combined, and washed with brine. Dried over  $\text{Na}_2\text{SO}_4$ , filtered, and concentrated under reduced pressure. The product was purified by silica gel column chromatography, using petroleum ether/EA = 30/1 (v/v) as an eluent.

## 6. Control Experiments

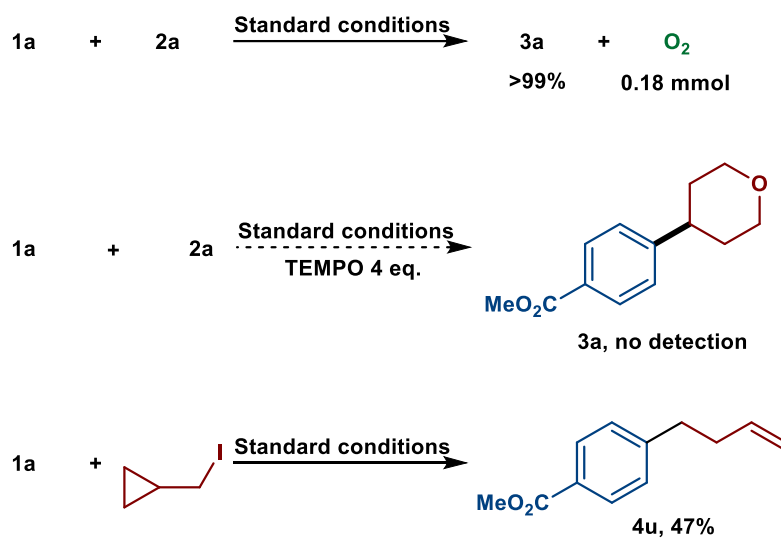

Figure S4. Control experiment

## 7. Cyclic Voltammetry Experiments

Cyclic voltammograms in solvent (15 mL) by using glassy carbon as the working electrode, Pt wire as the counter electrode and Ag/AgCl as the reference electrode under N<sub>2</sub> at room temperature. DMA (15 mL) containing 0.1 M <sup>n</sup>Bu<sub>4</sub>PF<sub>6</sub> was poured into the electro chemical cell in all experiments. The scan rate was 100 mV s<sup>-1</sup>.

### 1) Reduction Potential of Substrates

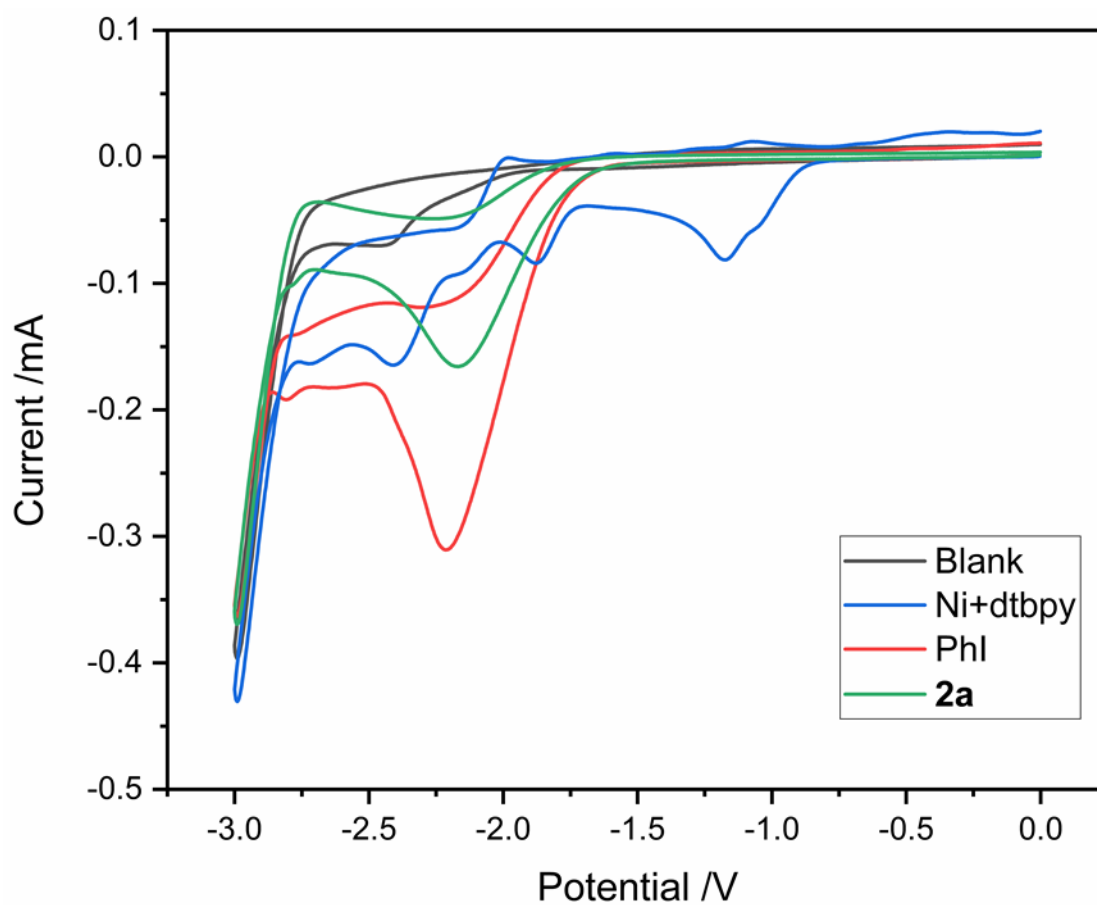

Figure S5: Cyclic voltammograms recorded on a glassy carbon electrode at 100 mVs<sup>-1</sup> in: (Gary) DMAc (15 mL), <sup>n</sup>Bu<sub>4</sub>PF<sub>6</sub> (0.1 M); (Blue) NiCl<sub>2</sub>·dme (0.05 mmol)/dtbpy (0.075 mmol), DMAc (15 mL), <sup>n</sup>Bu<sub>4</sub>PF<sub>6</sub> (0.1 M); (Red) PhI (0.1 mmol), DMAc (15 mL), <sup>n</sup>Bu<sub>4</sub>PF<sub>6</sub> (1 mol); (Green) **2a** (0.1 mmol), DMA (10 mL), <sup>n</sup>Bu<sub>4</sub>PF<sub>6</sub> (1 mol).

### 2) Interaction between [Ni]/L and PhI

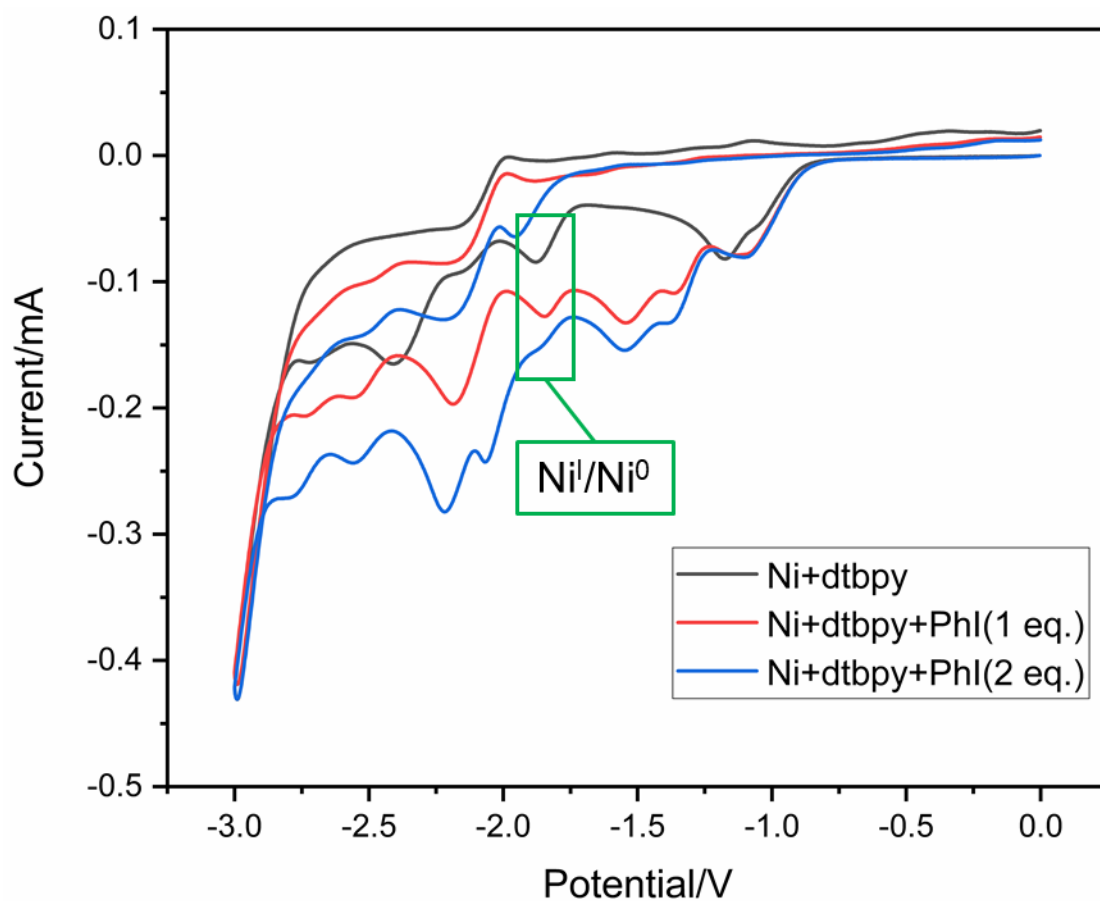

Figure S6: Cyclic voltammograms recorded on a glassy carbon electrode at 100 mVs<sup>-1</sup> in: (Gray) NiCl<sub>2</sub>·dme (0.05 mmol)/dtbpy (0.075 mmol), DMAc (15 mL), <sup>n</sup>Bu<sub>4</sub>PF<sub>6</sub> (0.1 M); (Red) NiCl<sub>2</sub>·dme (0.05 mmol)/dtbpy (0.075 mmol), DMAc (15 mL), <sup>n</sup>Bu<sub>4</sub>PF<sub>6</sub> (1 mol), PhI (0.1 mmol); (Blue) NiCl<sub>2</sub>·dme (0.05 mmol)/dtbpy (0.075 mmol), DMAc (15 mL), <sup>n</sup>Bu<sub>4</sub>PF<sub>6</sub> (1 mol), PhI (0.2 mmol)

### 3) Interaction between [Ni]/L and 2a

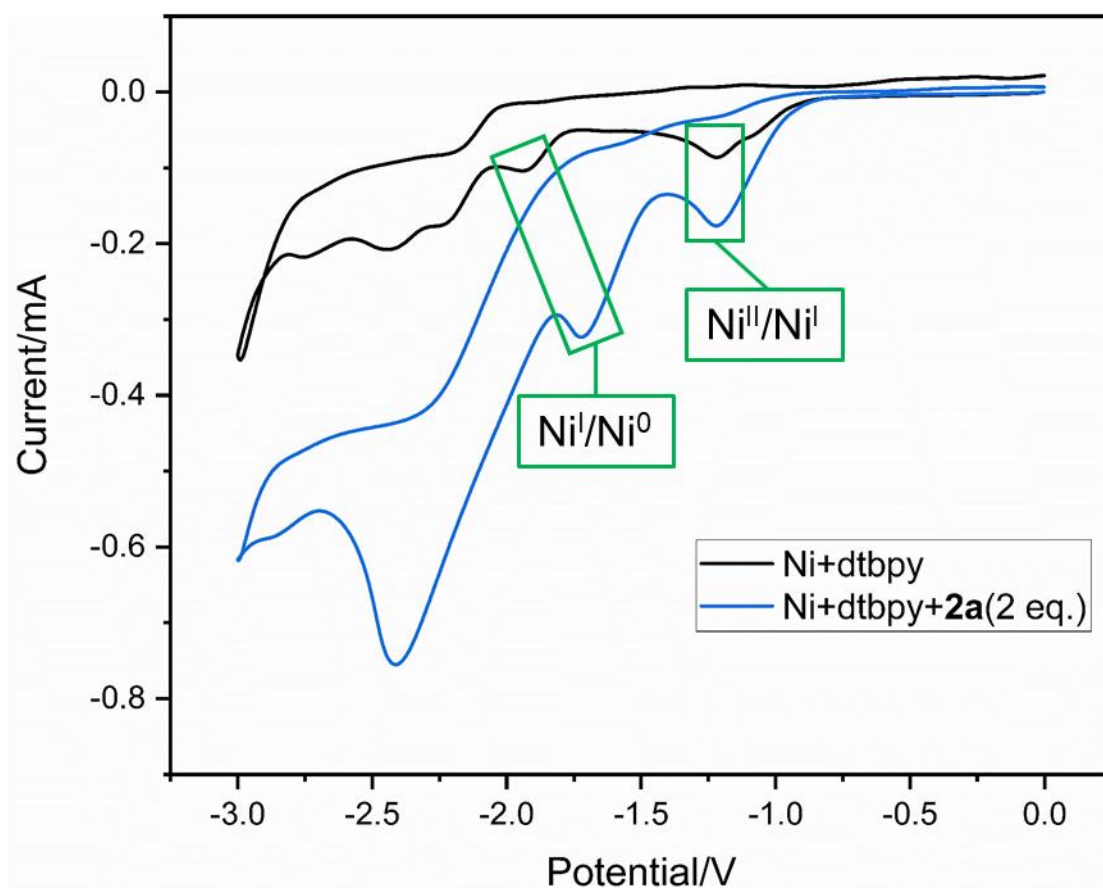

Figure S7: Cyclic voltammograms recorded on a glassy carbon electrode at 100 mVs<sup>-1</sup> in: (Gray) NiCl<sub>2</sub>·dme (0.05 mmol)/dtbpy (0.075 mmol), DMAc (15 mL), <sup>n</sup>Bu<sub>4</sub>PF<sub>6</sub> (0.1 M); (Red) NiCl<sub>2</sub>·dme (0.05 mmol)/dtbpy (0.075 mmol), DMAc (15 mL), <sup>n</sup>Bu<sub>4</sub>PF<sub>6</sub> (1 mol), **2a** (0.1 mmol); (Blue) NiCl<sub>2</sub>·dme (0.05 mmol)/dtbpy (0.075 mmol), DMAc (15 mL), <sup>n</sup>Bu<sub>4</sub>PF<sub>6</sub> (1 mol), **2a** (0.2 mmol)

## 8. Analytical Data of Products

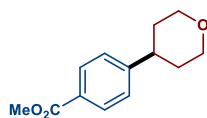

**methyl 4-(tetrahydro-2H-pyran-4-yl)benzoate**<sup>[1]</sup>: The product was purified by silica gel column chromatography, using petroleum ether/EA = 30/1 (v/v) as an eluent.

**<sup>1</sup>H NMR** (400 MHz, Chloroform-*d*)  $\delta$  7.91 (d, *J* = 8.3 Hz, 2H), 7.21 (d, *J* = 8.1 Hz, 2H), 4.02 – 3.98 (m, 2H), 3.82 (s, 3H), 3.45 (td, *J* = 11.5, 2.8 Hz, 2H), 2.77-2.70 (m, 1H), 1.80 – 1.67 (m, 4H).

**<sup>13</sup>C NMR** (101 MHz, CDCl<sub>3</sub>)  $\delta$  166.98, 151.09, 129.90, 128.30, 126.80, 68.20, 52.00, 41.64, 33.58.

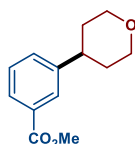

**methyl 3-(tetrahydro-2H-pyran-4-yl)benzoate**: The product was purified by silica gel column chromatography, using petroleum ether/EA = 30/1 (v/v) as an eluent.

**<sup>1</sup>H NMR** (400 MHz, Chloroform-*d*)  $\delta$  7.90 – 7.86 (m, 2H), 7.41 – 7.36 (m, 2H), 4.09 – 4.04 (m, 2H), 3.90 (d, *J* = 1.3 Hz, 3H), 3.45 (td, *J* = 11.5, 2.6 Hz, 2H), 2.82 – 2.75 (m, 1H), 1.84 – 1.73 (m, 4H).

**<sup>13</sup>C NMR** (101 MHz, CDCl<sub>3</sub>)  $\delta$  167.01, 146.02, 131.24, 130.24, 128.46, 127.85, 127.48, 68.13, 51.96, 41.25, 33.66.

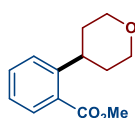

**methyl 2-(tetrahydro-2H-pyran-4-yl)benzoate**: The product was purified by silica gel column chromatography, using petroleum ether/EA = 30/1 (v/v) as an eluent.

**<sup>1</sup>H NMR** (600 MHz, Chloroform-*d*)  $\delta$  7.82 (dd, *J* = 7.8, 1.0 Hz, 1H), 7.51 (td, *J* = 7.5, 1.3 Hz, 1H), 7.44 – 7.42 (m, 1H), 7.29 – 7.27 (m, 1H), 4.10 (dd, *J* = 11.4, 4.3 Hz, 2H), 3.93 (s, 3H), 3.70 – 3.64 (m, 1H), 3.60 (td, *J* = 11.7, 2.2 Hz, 2H), 1.87 – 1.78 (m, 4H).

**<sup>13</sup>C NMR** (151 MHz, CDCl<sub>3</sub>)  $\delta$  168.44, 146.78, 132.04, 130.25, 129.71, 126.93, 125.91, 68.54, 52.04, 37.44, 33.90.



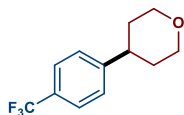

**4-(4-(trifluoromethyl)phenyl)tetrahydro-2H-pyran<sup>[2]</sup>:** The product was purified by silica gel column chromatography, using petroleum ether/EA = 60/1 (v/v) as an eluent.

**<sup>1</sup>H NMR** (400 MHz, Chloroform-*d*)  $\delta$  7.57 (d,  $J$  = 8.0 Hz, 2H), 7.34 (d,  $J$  = 8.0 Hz, 2H), 4.12 – 4.08 (m, 2H), 3.54 (td,  $J$  = 11.5, 2.8 Hz, 2H), 2.87 – 2.78 (m, 1H), 1.89-1.75 (m, 4H).

**<sup>13</sup>C NMR** (101 MHz, CDCl<sub>3</sub>)  $\delta$  149.74, 128.62 (q,  $J$  = 32.45 Hz), 127.07, 125.43 (q,  $J$  = 3.80 Hz), 124.23 (q,  $J$  = 272.90 Hz), 68.14, 41.46, 33.60.

**<sup>19</sup>F NMR** (376 MHz, Chloroform-*d*)  $\delta$  -62.36.

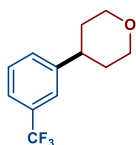

**4-(3-(trifluoromethyl)phenyl)tetrahydro-2H-pyran:** The product was purified by silica gel column chromatography, using petroleum ether/EA = 60/1 (v/v) as an eluent.

**<sup>1</sup>H NMR** (400 MHz, Chloroform-*d*)  $\delta$  7.57 – 7.40 (m, 4H), 4.12 – 4.08 (m, 2H), 3.57 – 3.52 (m, 2H), 2.87 – 2.80 (m, 1H), 1.89-1.75 (m, 4H).

**<sup>13</sup>C NMR** (101 MHz, CDCl<sub>3</sub>)  $\delta$  146.65, 130.79 (q,  $J$  = 32.22 Hz), 130.10, 128.95, 125.50, 123.57, 123.21, 68.17, 41.42, 33.71.

**<sup>19</sup>F NMR** (377 MHz, CDCl<sub>3</sub>)  $\delta$  -62.56.

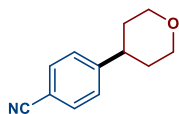

**4-(tetrahydro-2H-pyran-4-yl)benzonitrile<sup>[3]</sup>:** The product was purified by silica gel column chromatography, using petroleum ether/EA = 60/1 (v/v) as an eluent.

**<sup>1</sup>H NMR** (400 MHz, Chloroform-*d*)  $\delta$  7.53 (d,  $J$  = 8.2 Hz, 2H), 7.26 (d,  $J$  = 8.1 Hz, 2H), 4.02 (dd,  $J$  = 10.4, 3.0 Hz, 2H), 3.46 (td,  $J$  = 11.3, 3.5 Hz, 2H), 2.81 -2.73 (m, 1H), 1.78-1.69 (m, 4H).

**<sup>13</sup>C NMR** (101 MHz, CDCl<sub>3</sub>)  $\delta$  151.18, 132.42, 127.64, 118.96, 110.19, 68.04, 41.71, 33.39.

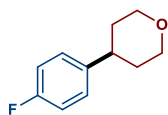

**4-(4-fluorophenyl)tetrahydro-2H-pyran:** The product was purified by silica gel column chromatography, using petroleum ether/EA = 60/1 (v/v) as an eluent.

**$^1\text{H}$  NMR** (400 MHz, Chloroform-*d*)  $\delta$  7.23 – 7.20 (m, 2H), 7.02 (d,  $J$  = 8.7 Hz, 2H), 4.11 (d,  $J$  = 10.8 Hz, 2H), 3.55 (td,  $J$  = 11.3, 3.5 Hz, 2H), 2.81 – 2.73 (m, 1H), 1.84 – 1.78 (m, 4H).

**$^{13}\text{C}$  NMR** (101 MHz,  $\text{CDCl}_3$ )  $\delta$  161.38 (d,  $J$  = 245.03 Hz), 141.53, 128.04 (d,  $J$  = 7.88 Hz), 115.21 (d,  $J$  = 21.11 Hz), 68.32, 40.85, 34.10.

**$^{19}\text{F}$  NMR** (377 MHz,  $\text{CDCl}_3$ )  $\delta$  -117.07.

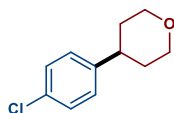

**4-(4-chlorophenyl)tetrahydro-2H-pyran<sup>[3]</sup>:** The product was purified by silica gel column chromatography, using petroleum ether/EA = 60/1 (v/v) as an eluent.

**$^1\text{H}$  NMR** (400 MHz, Chloroform-*d*)  $\delta$  7.31 (d,  $J$  = 8.3 Hz, 2H), 7.18 (d,  $J$  = 8.2 Hz, 2H), 4.11 (d,  $J$  = 10.6 Hz, 2H), 3.55 (t,  $J$  = 11.4 Hz, 2H), 2.81 – 2.73 (m, 1H), 1.79 (tt,  $J$  = 11.1, 5.2 Hz, 4H).

**$^{13}\text{C}$  NMR** (101 MHz,  $\text{CDCl}_3$ )  $\delta$  144.21, 131.83, 128.53, 128.01, 68.17, 40.91, 33.79.

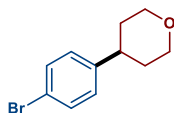

**4-(4-bromophenyl)tetrahydro-2H-pyran<sup>[3]</sup>:** The product was purified by silica gel column chromatography, using petroleum ether/EA = 60/1 (v/v) as an eluent.

**$^1\text{H}$  NMR** (400 MHz, Chloroform-*d*)  $\delta$  7.34 (d,  $J$  = 8.0 Hz, 2H), 7.01 (d,  $J$  = 8.0 Hz, 2H), 3.98 (dd,  $J$  = 10.5, 3.6 Hz, 2H), 3.43 (td,  $J$  = 11.2, 3.5 Hz, 2H), 2.63 (m, 1H), 1.74-1.64 (m, 4H).

**$^{13}\text{C}$  NMR** (101 MHz,  $\text{CDCl}_3$ )  $\delta$  143.75, 130.51, 127.46, 118.90, 67.18, 39.99, 32.74.

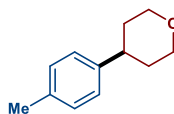

**4-(p-tolyl)tetrahydro-2H-pyran<sup>[2]</sup>:** The product was purified by silica gel column chromatography,

using petroleum ether/EA = 60/1 (v/v) as an eluent.

**<sup>1</sup>H NMR** (600 MHz, Chloroform-*d*)  $\delta$  7.17 – 7.14 (m, 4H), 4.11-4.08 (m, 2H), 3.55 (td,  $J$  = 11.7, 2.3 Hz, 2H), 2.77 – 2.71 (m, 1H), 2.35 (s, 3H), 1.86 – 1.76 (m, 4H).

**<sup>13</sup>C NMR** (151 MHz, CDCl<sub>3</sub>)  $\delta$  142.93, 135.82, 129.19, 126.60, 68.45, 41.15, 34.05, 20.97.

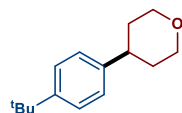

**4-(4-(tert-butyl)phenyl)tetrahydro-2H-pyran**<sup>[4]</sup>: The product was purified by silica gel column chromatography, using petroleum ether/EA = 60/1 (v/v) as an eluent.

**<sup>1</sup>H NMR** (600 MHz, Chloroform-*d*)  $\delta$  7.38 (d,  $J$  = 8.3 Hz, 2H), 7.20 (d,  $J$  = 8.3 Hz, 2H), 4.12-4.10 (m, 2H), 3.56 (td,  $J$  = 11.6, 2.5 Hz, 2H), 2.78-2.74 (m, 1H), 1.87 – 1.78 (m, 4H), 1.35 (d,  $J$  = 0.8 Hz, 9H).

**<sup>13</sup>C NMR** (151 MHz, CDCl<sub>3</sub>)  $\delta$  149.05, 142.80, 126.33, 125.35, 68.44, 40.97, 34.36, 33.95, 31.37.

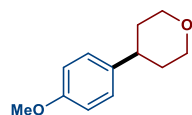

**4-(4-methoxyphenyl)tetrahydro-2H-pyran**<sup>[3]</sup>: The product was purified by silica gel column chromatography, using petroleum ether/EA = 60/1 (v/v) as an eluent.

**<sup>1</sup>H NMR** (400 MHz, Chloroform-*d*)  $\delta$  7.07 (d,  $J$  = 8.3 Hz, 2H), 6.78 (d,  $J$  = 8.3 Hz, 2H), 4.01 – 3.97 (m, 2H), 3.71 (s, 3H), 3.44 (td,  $J$  = 11.2, 3.3 Hz, 2H), 2.62 (m, 1H), 1.76-1.66 (m, 4H).

**<sup>13</sup>C NMR** (101 MHz, CDCl<sub>3</sub>)  $\delta$  158.05, 138.13, 127.61, 113.89, 68.46, 55.27, 40.72, 34.23.

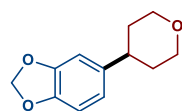

**5-(tetrahydro-2H-pyran-4-yl)benzo[d][1,3]dioxole**<sup>[5]</sup>: The product was purified by silica gel column chromatography, using petroleum ether/EA = 30/1 (v/v) as an eluent.

**<sup>1</sup>H NMR** (600 MHz, Chloroform-*d*)  $\delta$  6.78 – 6.70 (m, 2H), 6.69 (dt,  $J$  = 8.0, 1.1 Hz, 1H), 5.95 (s, 2H), 4.10 – 4.07 (m, 2H), 3.52 (td,  $J$  = 11.4, 3.1 Hz, 2H), 2.70 - 2.69 (m, 1H), 1.80 – 1.72 (m, 4H).

**<sup>13</sup>C NMR** (151 MHz, CDCl<sub>3</sub>)  $\delta$  147.63, 145.81, 139.98, 119.45, 108.18, 107.18, 100.79, 68.33, 41.32, 34.22.

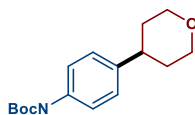

**tert-butyl (4-(tetrahydro-2H-pyran-4-yl)phenyl)carbamate:** The product was purified by silica gel column chromatography, using petroleum ether/EA = 30/1 (v/v) as an eluent.

**<sup>1</sup>H NMR** (400 MHz, Chloroform-*d*) δ 7.34 (d, *J* = 8.2 Hz, 2H), 7.15 (d, *J* = 8.5 Hz, 2H), 6.83 (s, 1H), 4.12-4.08 (m, 2H), 3.54 (td, *J* = 11.3, 3.0 Hz, 2H), 2.75 – 2.67 (m, 1H), 1.85 – 1.73 (m, 4H), 1.54 (s, 9H).

**<sup>13</sup>C NMR** (101 MHz, CDCl<sub>3</sub>) δ 152.89, 140.36, 136.56, 126.97, 118.78, 80.12, 68.21, 40.70, 33.87, 28.23.

**HRMS** (ESI): *m/z*: [M + Na]<sup>+</sup> target C<sub>16</sub>H<sub>23</sub>NNaO<sub>3</sub><sup>+</sup> 300.1570; found 300.1564.

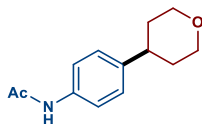

**N-(4-(tetrahydro-2H-pyran-4-yl)phenyl)acetamide:** The product was purified by silica gel column chromatography, using petroleum ether/EA = 30/1 (v/v) as an eluent.

**<sup>1</sup>H NMR** (400 MHz, Chloroform-*d*) δ 7.43 (d, *J* = 8.2 Hz, 2H), 7.17 (d, *J* = 8.2 Hz, 2H), 4.09 – 4.05 (m, 2H), 3.52 (td, *J* = 11.3, 3.3 Hz, 2H), 2.76 – 2.68 (m, 1H), 2.16 (s, 3H), 1.84 – 1.74 (m, 4H).

**<sup>13</sup>C NMR** (101 MHz, CDCl<sub>3</sub>) δ 168.27, 141.19, 136.00, 127.19, 120.22, 68.34, 40.96, 33.93, 24.50.

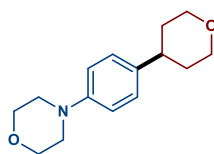

**4-(4-(tetrahydro-2H-pyran-4-yl)phenyl)morpholine:** The product was purified by silica gel column chromatography, using petroleum ether/EA = 30/1 (v/v) as an eluent.

**<sup>1</sup>H NMR** (400 MHz, Chloroform-*d*) δ 7.15 (d, *J* = 8.3 Hz, 2H), 6.88 (d, *J* = 8.3 Hz, 2H), 4.13 – 4.02 (m, 2H), 3.86 (t, *J* = 4.7 Hz, 4H), 3.52 (td, *J* = 11.2, 3.3 Hz, 2H), 3.14 (t, *J* = 4.8 Hz, 4H), 2.73 - 2.66 (m, 1H), 1.84-1.72 (m, *J* = 11.6, 5.7 Hz, 4H).

**<sup>13</sup>C NMR** (101 MHz, CDCl<sub>3</sub>) δ 149.69, 137.52, 127.34, 115.85, 68.41, 66.92, 49.54, 40.59, 34.06.

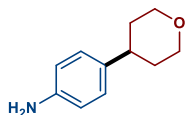

**4-(tetrahydro-2H-pyran-4-yl)aniline:** The product was purified by silica gel column chromatography, using petroleum ether/EA = 10/1 (v/v) as an eluent.

**<sup>1</sup>H NMR** (400 MHz, Chloroform-*d*) δ 7.02 (d, *J* = 8.4 Hz, 2H), 6.65 (d, *J* = 8.0 Hz, 2H), 4.09 – 4.04 (m, 2H), 3.55-3.47 (m, 2H), 2.69 – 2.60 (m, 1H), 1.82 – 1.70 (m, 4H).

**<sup>13</sup>C NMR** (101 MHz, CDCl<sub>3</sub>) δ 144.59, 136.04, 127.39, 115.20, 68.40, 40.58, 34.16.

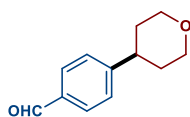

**4-(tetrahydro-2H-pyran-4-yl)benzaldehyde**<sup>[6]</sup>: The product was purified by silica gel column chromatography, using petroleum ether/EA = 30/1 (v/v) as an eluent.

**<sup>1</sup>H NMR** (400 MHz, Chloroform-*d*) δ 9.98 (s, 1H), 7.84 (d, *J* = 8.0 Hz, 2H), 7.40 (d, *J* = 8.0 Hz, 2H), 4.13 – 4.08 (m, 2H), 3.58-3.51 (m, 2H), 2.90 – 2.82 (m, 1H), 1.82 – 1.76 (m, 4H).

**<sup>13</sup>C NMR** (101 MHz, CDCl<sub>3</sub>) δ 191.81, 152.80, 134.81, 130.03, 127.37, 68.03, 41.75, 33.39.

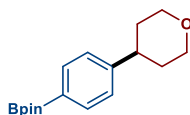

**4,4,5,5-tetramethyl-2-(4-(tetrahydro-2H-pyran-4-yl)phenyl)-1,3,2-dioxaborolane**<sup>[3]</sup>: The product was purified by silica gel column chromatography, using petroleum ether/EA = 60/1 (v/v) as an eluent.

**<sup>1</sup>H NMR** (400 MHz, Chloroform-*d*) δ 7.77 (d, *J* = 7.6 Hz, 2H), 7.24 (d, *J* = 8.0 Hz, 2H), 4.07 (dd, *J* = 10.9, 3.9 Hz, 2H), 3.52 (td, *J* = 11.6, 2.5 Hz, 2H), 2.80 -2.72 (m, 1H), 1.88 – 1.74 (m, 4H), 1.33 (s, 12H).

**<sup>13</sup>C NMR** (101 MHz, CDCl<sub>3</sub>) δ 149.14, 135.11, 126.23, 83.69, 68.36, 41.79, 33.74, 24.87.

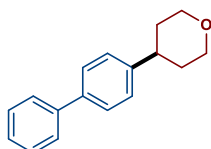

**4-([1,1'-biphenyl]-4-yl)tetrahydro-2H-pyran:** The product was purified by silica gel column chromatography, using petroleum ether/EA = 60/1 (v/v) as an eluent.

**<sup>1</sup>H NMR** (400 MHz, Chloroform-*d*) δ 7.58 – 7.52 (m, 4H), 7.40 (t, *J* = 7.6 Hz, 2H), 7.29 (dd, *J* = 17.2,

7.7 Hz, 3H), 4.08 (dd,  $J = 10.9, 3.6$  Hz, 2H), 3.55 – 3.48 (m, 2H), 2.80 – 2.74 (m, 1H), 1.89 – 1.75 (m, 4H).

$^{13}\text{C}$  NMR (101 MHz,  $\text{CDCl}_3$ )  $\delta$  144.86, 140.85, 139.17, 128.65, 127.15, 127.07, 127.02, 126.91, 68.29, 41.13, 33.85.

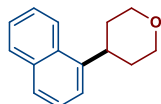

**4-(naphthalen-1-yl)tetrahydro-2H-pyran:** The product was purified by silica gel column chromatography, using petroleum ether/EA = 60/1 (v/v) as an eluent.

$^1\text{H}$  NMR (400 MHz, Chloroform- $d$ )  $\delta$  8.20 (d,  $J = 8.4$  Hz, 1H), 7.95 (d,  $J = 7.9$  Hz, 1H), 7.81 (d,  $J = 8.1$  Hz, 1H), 7.63 – 7.47 (m, 4H), 4.23 (dd,  $J = 11.0, 3.5$  Hz, 2H), 3.80 – 3.74 (td,  $J = 11.5, 2.6$  Hz, 2H), 3.66 (tt,  $J = 11.5, 4.1$  Hz, 1H), 2.10 – 1.97 (m, 4H).

$^{13}\text{C}$  NMR (101 MHz,  $\text{CDCl}_3$ )  $\delta$  141.41, 133.89, 131.03, 129.02, 126.69, 125.78, 125.60, 125.31, 122.68, 122.44, 68.59, 33.79, 33.67.

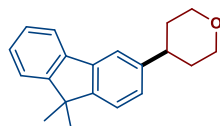

**4-(9,9-dimethyl-9H-fluoren-3-yl)tetrahydro-2H-pyran:** The product was purified by silica gel column chromatography, using petroleum ether/EA = 60/1 (v/v) as an eluent.

$^1\text{H}$  NMR (400 MHz, Chloroform- $d$ )  $\delta$  7.75 (dd,  $J = 12.6, 7.3$  Hz, 2H), 7.49 (d,  $J = 7.5$  Hz, 1H), 7.41 – 7.34 (m, 3H), 7.27 (d,  $J = 8.9$  Hz, 1H), 4.19 (dd,  $J = 11.0, 3.7$  Hz, 2H), 3.63 (td,  $J = 11.6, 2.3$  Hz, 2H), 2.91 (tt,  $J = 11.6, 4.1$  Hz, 1H), 1.99 – 1.88 (m, 4H), 1.56 (s, 6H).

$^{13}\text{C}$  NMR (101 MHz,  $\text{CDCl}_3$ )  $\delta$  153.88, 153.55, 145.20, 139.01, 137.47, 126.84, 125.44, 122.45, 120.84, 119.88, 119.70, 68.40, 46.71, 41.86, 34.19, 27.19.

**HRMS (ESI):**  $m/z$ :  $[\text{M} + \text{e}]^-$  Calcd for  $\text{C}_{20}\text{H}_{22}\text{Oe}^-$  278.1665; Found 278.1670.

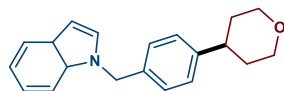

**1-(4-(tetrahydro-2H-pyran-4-yl)benzyl)-3a,7a-dihydro-1H-indole:** The product was purified by silica gel column chromatography, using petroleum ether/EA = 20/1 (v/v) as an eluent.

**<sup>1</sup>H NMR** (400 MHz, Chloroform-*d*) δ 7.74 (d, *J* = 7.8 Hz, 1H), 7.37 – 7.15 (m, 9H), 6.63 (d, *J* = 3.1 Hz, 1H), 5.35 (s, 2H), 4.14 (dd, *J* = 10.3, 3.6 Hz, 2H), 3.58 (td, *J* = 11.5, 2.7 Hz, 2H), 2.79 (ddt, *J* = 11.4, 7.1, 4.3 Hz, 1H), 1.81 (dt, *J* = 15.0, 7.6 Hz, 4H).

**<sup>13</sup>C NMR** (101 MHz, Chloroform-*d*) δ 145.19, 136.20, 135.47, 131.95, 128.63, 128.12, 127.03, 126.91, 121.57, 120.90, 119.42, 109.60, 101.57, 68.25, 49.67, 41.10, 33.80.

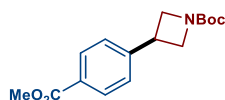

**tert-butyl 3-(4-(methoxycarbonyl)phenyl)azetidine-1-carboxylate**<sup>[7]</sup>: The product was purified by silica gel column chromatography, using petroleum ether/EA = 30/1 (v/v) as an eluent.

**<sup>1</sup>H NMR** (400 MHz, Chloroform-*d*) δ 8.01 (d, *J* = 8.3 Hz, 2H), 7.37 (d, *J* = 8.3 Hz, 2H), 4.35 (t, *J* = 8.6 Hz, 2H), 3.97 (dd, *J* = 8.5, 6.0 Hz, 2H), 3.90 (s, 3H), 3.81-3.74 (m, 1H), 1.46 (s, 9H).

**<sup>13</sup>C NMR** (101 MHz, CDCl<sub>3</sub>) δ 166.62, 156.18, 147.32, 129.91, 128.76, 126.67, 79.57, 56.13, 51.94, 33.32, 28.26.

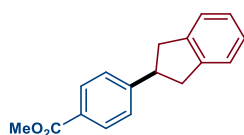

**methyl 4-(2,3-dihydro-1H-inden-2-yl)benzoate**<sup>[8]</sup>: The product was purified by silica gel column chromatography, using petroleum ether/EA = 60/1 (v/v) as an eluent.

**<sup>1</sup>H NMR** (400 MHz, Chloroform-*d*) δ 8.06 (d, *J* = 8.3 Hz, 2H), 7.42 (d, *J* = 8.2 Hz, 2H), 7.33 – 7.26 (m, 2H), 7.27 (dd, *J* = 5.6, 3.2 Hz, 2H), 3.97 (s, 3H), 3.79 (q, *J* = 8.4 Hz, 1H), 3.44 (dd, *J* = 15.6, 8.2 Hz, 2H), 3.15 (dd, *J* = 15.6, 8.6 Hz, 2H).

**<sup>13</sup>C NMR** (101 MHz, CDCl<sub>3</sub>) δ 166.91, 150.88, 142.40, 129.72, 128.06, 126.96, 126.51, 124.25, 51.88, 45.23, 40.61.

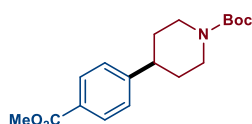

**tert-butyl 4-(4-(methoxycarbonyl)phenyl)piperidine-1-carboxylate**<sup>[8]</sup>: The product was purified by silica gel column chromatography, using petroleum ether/EA = 30/1 (v/v) as an eluent.

**<sup>1</sup>H NMR** (400 MHz, Chloroform-*d*)  $\delta$  7.89 (d,  $J$  = 8.0 Hz, 2H), 7.18 (d,  $J$  = 8.1 Hz, 2H), 4.18 (d,  $J$  = 13.0 Hz, 2H), 3.81 (d,  $J$  = 0.9 Hz, 3H), 2.76 – 2.59 (m, 3H), 1.76 – 1.72 (m, 2H), 1.55 (tt,  $J$  = 12.6, 6.3 Hz, 2H), 1.40 (d,  $J$  = 1.0 Hz, 9H).

**<sup>13</sup>C NMR** (101 MHz, CDCl<sub>3</sub>)  $\delta$  166.84, 154.66, 150.93, 129.76, 128.21, 126.71, 79.40, 51.87, 44.13, 42.67, 32.76, 28.36.

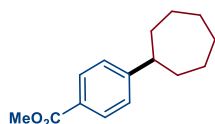

**methyl 4-cycloheptylbenzoate**<sup>[8]</sup>: The product was purified by silica gel column chromatography, using petroleum ether/EA = 60/1 (v/v) as an eluent.

**<sup>1</sup>H NMR** (400 MHz, Chloroform-*d*)  $\delta$  7.97 (d,  $J$  = 8.3 Hz, 2H), 7.27 (d,  $J$  = 8.3 Hz, 2H), 3.92 (s, 3H), 2.74 (tt,  $J$  = 10.5, 3.6 Hz, 1H), 1.94 – 1.58 (m, 12H).

**<sup>13</sup>C NMR** (101 MHz, CDCl<sub>3</sub>)  $\delta$  167.10, 155.28, 137.65, 129.68, 126.63, 51.83, 47.00, 36.43, 27.81, 27.15.

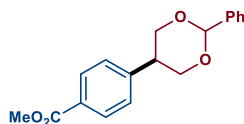

**methyl 4-(2-phenyl-1,3-dioxan-5-yl)benzoate**: The product was purified by silica gel column chromatography, using petroleum ether/EA = 60/1 (v/v) as an eluent.

**<sup>1</sup>H NMR** (600 MHz, Chloroform-*d*)  $\delta$  8.01 (d,  $J$  = 8.1 Hz, 2H), 7.48 – 7.47 (m, 2H), 7.40 – 7.36 (m, 5H), 5.99 (s, 1H), 4.53 – 4.52 (m, 1H), 4.22 (dd,  $J$  = 8.2, 6.1 Hz, 1H), 3.93 (d,  $J$  = 0.7 Hz, 3H), 3.78-3.75 (m, 1H), 3.17 (dd,  $J$  = 13.9, 6.8 Hz, 1H), 2.97 (dd,  $J$  = 14.0, 6.2 Hz, 1H).

**<sup>13</sup>C NMR** (151 MHz, CDCl<sub>3</sub>)  $\delta$  166.97, 142.70, 138.11, 129.87, 129.31, 129.17, 128.65, 128.37, 126.33, 103.52, 70.08, 52.06, 39.46.

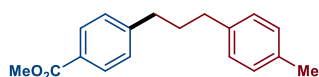

**methyl 4-(3-(p-tolyl)propyl)benzoate**: The product was purified by silica gel column chromatography, using petroleum ether/EA = 60/1 (v/v) as an eluent.

**<sup>1</sup>H NMR** (400 MHz, Chloroform-*d*)  $\delta$  7.99 (d,  $J$  = 8.1 Hz, 2H), 7.27 (dd,  $J$  = 8.0, 5.4 Hz, 4H), 7.13 (d,  $J$



= 7.8 Hz, 2H), 3.94 (s, 3H), 2.87 (dt,  $J$  = 29.0, 7.4 Hz, 4H), 2.36 (s, 3H), 1.99 (q,  $J$  = 7.4 Hz, 2H).

**$^{13}\text{C}$  NMR** (101 MHz,  $\text{CDCl}_3$ )  $\delta$  167.02, 146.87, 136.18, 132.32, 130.15, 129.69, 129.64, 128.47, 127.93, 51.93, 34.52, 33.62, 30.27, 20.95.

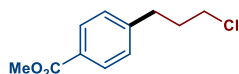

**methyl 4-(3-chloropropyl)benzoate**: The product was purified by silica gel column chromatography, using petroleum ether/EA = 80/1 (v/v) as an eluent.

**$^1\text{H}$  NMR** (400 MHz, Chloroform- $d$ )  $\delta$  8.00 – 8.00 (m, 2H), 7.29 (d,  $J$  = 8.1 Hz, 2H), 3.93 (s, 3H), 3.55 (t,  $J$  = 6.4 Hz, 2H), 2.86 (t,  $J$  = 7.5 Hz, 2H), 2.12 (p,  $J$  = 6.6 Hz, 2H).

**$^{13}\text{C}$  NMR** (101 MHz,  $\text{CDCl}_3$ )  $\delta$  166.95, 146.12, 129.78, 128.52, 128.15, 51.96, 43.92, 33.55, 32.71.

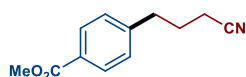

**methyl 4-(4-cyanobutyl)benzoate**<sup>[9]</sup>: The product was purified by silica gel column chromatography, using petroleum ether/EA = 60/1 (v/v) as an eluent.

**$^1\text{H}$  NMR** (600 MHz, Chloroform- $d$ )  $\delta$  7.98 (d,  $J$  = 7.8 Hz, 2H), 7.25 (d,  $J$  = 8.4 Hz, 2H), 3.92 (s, 3H), 2.73 (t,  $J$  = 7.5 Hz, 2H), 2.37 (t,  $J$  = 7.0 Hz, 2H), 1.84 - 1.68 (m, 2H).

**$^{13}\text{C}$  NMR** (151 MHz,  $\text{CDCl}_3$ )  $\delta$  166.91, 146.61, 129.73, 128.29, 128.05, 119.37, 51.91, 34.91, 29.79, 24.73, 16.94.

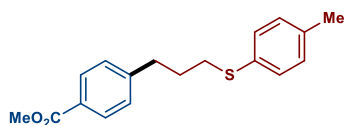

**methyl 4-(3-(p-tolylthio)propyl)benzoate**: The product was purified by silica gel column chromatography, using petroleum ether/EA = 60/1 (v/v) as an eluent.

**$^1\text{H}$  NMR** (400 MHz, Chloroform- $d$ )  $\delta$  7.99 (d,  $J$  = 8.3 Hz, 2H), 7.64 (d,  $J$  = 8.1 Hz, 2H), 7.48 (d,  $J$  = 8.0 Hz, 2H), 7.28 (d,  $J$  = 8.3 Hz, 2H), 4.58 (s, 2H), 3.93 (s, 3H), 3.53 (t,  $J$  = 6.2 Hz, 2H), 2.84 – 2.80 (m, 2H), 2.00 (dt,  $J$  = 13.8, 6.3 Hz, 2H).

**$^{13}\text{C}$  NMR** (101 MHz,  $\text{CDCl}_3$ )  $\delta$  167.11, 147.37, 130.21, 129.73, 128.50, 127.93, 127.51, 125.33, 125.29, 72.12, 69.60, 51.96, 32.41, 30.95.

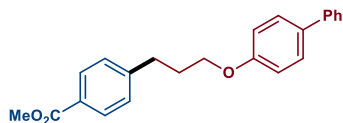

**methyl 4-(3-([1,1'-biphenyl]-4-yloxy)propyl)benzoate:** The product was purified by silica gel column chromatography, using petroleum ether/EA = 60/1 (v/v) as an eluent.

**<sup>1</sup>H NMR** (600 MHz, Chloroform-*d*) δ 8.00 (d, *J* = 8.2 Hz, 2H), 7.57 (dd, *J* = 20.1, 7.9 Hz, 4H), 7.44 (t, *J* = 7.7 Hz, 2H), 7.33 (d, *J* = 8.1 Hz, 3H), 7.01 – 6.98 (m, 2H), 4.03 (t, *J* = 6.2 Hz, 2H), 3.94 (s, 3H), 2.94 – 2.91 (m, 2H), 2.17 (dt, *J* = 13.6, 6.3 Hz, 2H).

**<sup>13</sup>C NMR** (151 MHz, CDCl<sub>3</sub>) δ 167.08, 158.45, 147.03, 140.78, 133.79, 129.78, 128.69, 128.56, 128.13, 128.00, 126.69, 126.63, 114.76, 66.70, 51.97, 32.22, 30.50.

**HRMS** (ESI) *m/z*: [M + Na]<sup>+</sup> Calcd for C<sub>23</sub>H<sub>22</sub>NaO<sub>3</sub><sup>+</sup> 369.1461; Found 369.1457.

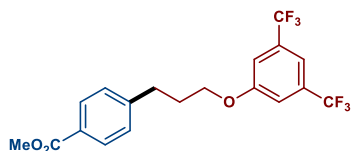

**methyl 4-(3-(3,5-bis(trifluoromethyl)phenoxy)propyl)benzoate:** The product was purified by silica gel column chromatography, using petroleum ether/EA = 60/1 (v/v) as an eluent.

**<sup>1</sup>H NMR** (400 MHz, Chloroform-*d*) δ 7.91 (d, *J* = 7.9 Hz, 2H), 7.39 (s, 1H), 7.24 – 7.17 (m, 4H), 3.97 (t, *J* = 6.1 Hz, 2H), 3.84 (s, 3H), 2.82 (t, *J* = 7.6 Hz, 2H), 2.20 – 2.03 (m, 2H).

**<sup>13</sup>C NMR** (101 MHz, Chloroform-*d*) δ 166.95, 159.43, 146.41, 133.27, 132.94, 132.61, 132.27, 129.86, 128.45, 128.23, 124.51, 121.80, 114.73, 114.23, 67.49, 51.94, 32.03, 30.14.

**<sup>19</sup>F NMR** (377 MHz, Chloroform-*d*) δ -63.07.

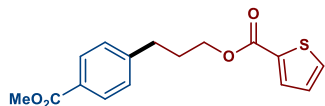

**3-(4-(methoxycarbonyl)phenyl)propyl thiophene-2-carboxylate:** The product was purified by silica gel column chromatography, using petroleum ether/EA = 60/1 (v/v) as an eluent.

**<sup>1</sup>H NMR** (400 MHz, Chloroform-*d*) δ 7.99 (d, *J* = 8.2 Hz, 2H), 7.81 (d, *J* = 3.8 Hz, 1H), 7.58 (d, *J* = 4.8 Hz, 1H), 7.31 (d, *J* = 8.2 Hz, 2H), 7.14 – 7.11 (m, 1H), 4.34 (t, *J* = 6.4 Hz, 2H), 3.92 (s, 3H), 2.87 – 2.83 (m, 2H), 2.12 (dt, *J* = 13.5, 6.6 Hz, 2H).

**<sup>13</sup>C NMR** (101 MHz, CDCl<sub>3</sub>) δ 166.94, 162.06, 146.53, 133.67, 133.33, 132.30, 129.75, 128.39, 128.02,

127.68, 64.05, 51.91, 32.18, 29.86.

**HRMS** (ESI):  $m/z$ :  $[M + Li]^+$  Calcd for  $C_{16}H_{16}LiO_4S^+$  311.0924; Found 311.0871.

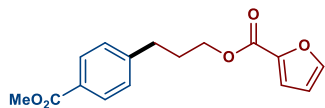

**3-(4-(methoxycarbonyl)phenyl)propyl furan-2-carboxylate:** The product was purified by silica gel column chromatography, using petroleum ether/EA = 60/1 (v/v) as an eluent.

**$^1H$  NMR** (400 MHz, Chloroform- $d$ )  $\delta$  7.96 (d,  $J$  = 8.0 Hz, 2H), 7.59 – 7.58 (m, 1H), 7.28 (d,  $J$  = 8.0 Hz, 2H), 7.16 (d,  $J$  = 3.6 Hz, 1H), 6.51 (dd,  $J$  = 3.6, 1.8 Hz, 1H), 4.32 (t,  $J$  = 6.5 Hz, 2H), 3.90 (s, 3H), 2.81 (t,  $J$  = 7.7 Hz, 2H), 2.10 (dt,  $J$  = 13.7, 6.6 Hz, 2H).

**$^{13}C$  NMR** (101 MHz,  $CDCl_3$ )  $\delta$  166.86, 158.52, 146.44, 146.21, 144.50, 129.68, 128.31, 127.96, 117.77, 111.70, 63.84, 51.84, 32.07, 29.75.

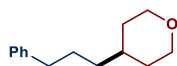

**4-(3-phenylpropyl)tetrahydro-2H-pyran**<sup>[10]</sup>: The product was purified by silica gel column chromatography, using petroleum ether/EA = 60/1 (v/v) as an eluent.

**$^1H$  NMR** (400 MHz, Chloroform- $d$ )  $\delta$  7.29 – 7.24 (m, 2H), 7.19 – 7.15 (m, 3H), 3.93 (dd,  $J$  = 11.6, 4.4 Hz, 2H), 3.38 – 3.31 (m, 2H), 2.59 (t,  $J$  = 7.8 Hz, 2H), 1.67 – 1.55 (m, 4H), 1.52 – 1.42 (m, 1H), 1.32 – 1.23 (m, 4H).

**$^{13}C$  NMR** (101 MHz,  $CDCl_3$ )  $\delta$  142.55, 128.30, 128.22, 125.63, 68.10, 36.52, 36.06, 34.88, 33.13, 28.25.

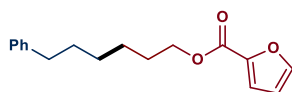

**6-phenylhexyl furan-2-carboxylate:** The product was purified by silica gel column chromatography, using petroleum ether/EA = 60/1 (v/v) as an eluent.

**$^1H$  NMR** (400 MHz, Chloroform- $d$ )  $\delta$  7.48 (d,  $J$  = 1.7 Hz, 1H), 7.23 – 7.15 (m, 2H), 7.08 (d,  $J$  = 9.6 Hz, 4H), 6.41 (dd,  $J$  = 3.5, 1.8 Hz, 1H), 4.21 (t,  $J$  = 6.7 Hz, 2H), 2.53 (t,  $J$  = 7.7 Hz, 2H), 1.66 (p,  $J$  = 6.9 Hz, 2H), 1.56 (p,  $J$  = 7.5 Hz, 2H), 1.34 (tdd,  $J$  = 15.4, 5.9, 2.9 Hz, 4H).

**$^{13}C$  NMR** (101 MHz, Chloroform- $d$ )  $\delta$  158.86, 146.20, 144.91, 142.62, 128.40, 128.27, 125.66, 117.72, 111.79, 65.03, 35.85, 31.33, 28.87, 28.64, 25.80.

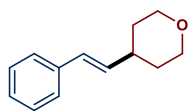

**(E)-4-styryltetrahydro-2H-pyran<sup>[11]</sup>:** The product was purified by silica gel column chromatography, using petroleum ether/EA = 60/1 (v/v) as an eluent.

**<sup>1</sup>H NMR** (400 MHz, Chloroform-*d*)  $\delta$  7.29 – 7.11 (m, 5H), 6.31 (d,  $J$  = 8.0 Hz, 1H), 6.09 (dd,  $J$  = 15.6, 6.4 Hz, 1H), 3.96 – 3.91 (m, 2H), 3.42 – 3.36 (m, 2H), 2.36 – 2.26 (m, 1H), 1.66 - 1.60 (m, 2H), 1.55-1.45 (m, 4H).

**<sup>13</sup>C NMR (101 MHz, CDCl<sub>3</sub>)**  $\delta$  137.51, 134.57, 128.50, 128.24, 127.06, 126.00, 67.71, 38.35, 32.61.

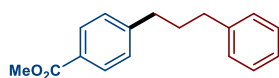

**methyl 4-(3-phenylpropyl)benzoate<sup>[12]</sup>:** The product was purified by silica gel column chromatography, using petroleum ether/EA = 30/1 (v/v) as an eluent.

**<sup>1</sup>H NMR** (400 MHz, Chloroform-*d*)  $\delta$  8.02 (d,  $J$  = 8.2 Hz, 2H), 7.36 – 7.22 (m, 5H), 7.23 (d,  $J$  = 8.1 Hz, 2H), 3.95 (s, 3H), 2.73 (dt,  $J$  = 18.7, 7.7 Hz, 4H), 2.03 (p,  $J$  = 7.7 Hz, 2H).

**<sup>13</sup>C NMR (101 MHz, CDCl<sub>3</sub>)**  $\delta$  167.07, 147.76, 141.83, 129.62, 128.40, 128.35, 128.30, 127.74, 125.80, 51.89, 35.35, 35.29, 32.52.

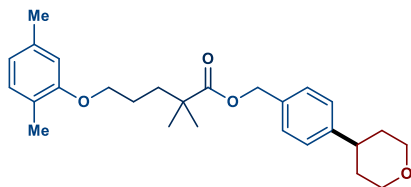

**4-(tetrahydro-2H-pyran-4-yl)benzyl 5-(2,5-dimethylphenoxy)-2-methylpentanoate:** The product was purified by silica gel column chromatography, using petroleum ether/EA = 60/1 (v/v) as an eluent.

**<sup>1</sup>H NMR** (400 MHz, Chloroform-*d*)  $\delta$  7.36 (d,  $J$  = 7.9 Hz, 2H), 7.26 (d,  $J$  = 7.9 Hz, 2H), 7.06 (d,  $J$  = 7.4 Hz, 1H), 6.72 (d,  $J$  = 7.5 Hz, 1H), 6.65 (s, 1H), 5.16 (s, 2H), 4.17 – 4.12 (m, 2H), 3.94 (t,  $J$  = 5.1 Hz, 2H), 3.58 (td,  $J$  = 11.5, 2.7 Hz, 2H), 2.79 (td,  $J$  = 11.5, 5.7 Hz, 1H), 2.37 (s, 3H), 2.22 (s, 3H), 1.85 – 1.79 (m, 8H), 1.31 (s, 6H).

**<sup>13</sup>C NMR (101 MHz, CDCl<sub>3</sub>)**  $\delta$  177.49, 156.85, 145.65, 136.31, 134.25, 130.19, 128.03, 126.78, 123.45, 120.59, 111.82, 68.24, 67.79, 65.86, 42.07, 41.21, 37.03, 33.80, 29.62, 25.07, 21.33, 15.69.

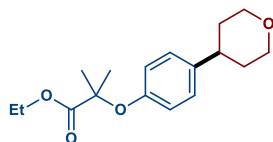

ethyl 2-methyl-2-(4-(tetrahydro-2H-pyran-4-yl)phenoxy)propanoate: White solid (59% yield.). The product was purified by silica gel column chromatography, using petroleum ether/EA = 60/1 (v/v) as an eluent.

**<sup>1</sup>H NMR** (400 MHz, Chloroform-*d*)  $\delta$  7.10 (d,  $J$  = 8.6 Hz, 2H), 6.81 (d,  $J$  = 8.6 Hz, 2H), 4.25 (q,  $J$  = 7.1 Hz, 2H), 4.10 – 4.06 (m, 2H), 3.56 – 3.49 (m, 2H), 2.70 (tt,  $J$  = 10.5, 5.5 Hz, 1H), 1.80 – 1.74 (m, 4H), 1.60 (s, 6H), 1.28 (d,  $J$  = 7.1 Hz, 3H).

**<sup>13</sup>C NMR** (101 MHz, CDCl<sub>3</sub>)  $\delta$  174.33, 153.75, 139.60, 127.25, 119.28, 68.40, 61.34, 40.73, 34.10, 28.90, 25.38, 14.07.

m/z: [M + H]<sup>+</sup> Calcd for C<sub>17</sub>H<sub>25</sub>O<sub>4</sub><sup>+</sup> 293.1747; Found 293.1729.

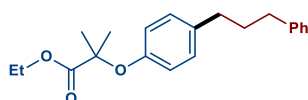

ethyl 2-methyl-2-(4-(3-phenylpropyl)phenoxy)propanoate: Yellow oil (81% yield.). The product was purified by silica gel column chromatography, using petroleum ether/EA = 60/1 (v/v) as an eluent.

**<sup>1</sup>H NMR** (400 MHz, Chloroform-*d*)  $\delta$  7.32 – 7.29 (m, 2H), 7.21 (dd,  $J$  = 7.6, 5.5 Hz, 3H), 7.08 (d,  $J$  = 8.3 Hz, 2H), 6.81 (d,  $J$  = 8.3 Hz, 2H), 4.30-4.25 (m, 2H), 2.64 (dt,  $J$  = 18.0, 7.7 Hz, 4H), 2.00-1.92 (m, 2H), 1.61 (d,  $J$  = 1.0 Hz, 6H), 1.31 – 1.27 (m, 3H).

**<sup>13</sup>C NMR** (101 MHz, CDCl<sub>3</sub>)  $\delta$  174.44, 153.40, 142.33, 136.06, 128.99, 128.43, 128.29, 125.72, 119.32, 79.10, 61.35, 35.41, 34.59, 33.05, 25.38, 14.10.

m/z: [M + Na]<sup>+</sup> Calcd for C<sub>21</sub>H<sub>26</sub>NaO<sub>3</sub><sup>+</sup> 349.1774; Found 349.1770.

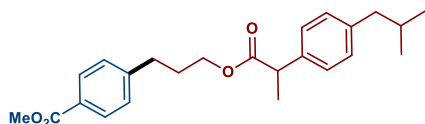

methyl 4-(3-((2-(4-isobutylphenyl)propanoyl)oxy)propyl)benzoate: White solid (81% yield.). The product was purified by silica gel column chromatography, using petroleum ether/EA = 60/1 (v/v) as an eluent.

**<sup>1</sup>H NMR** (600 MHz, Chloroform-*d*) δ 7.93 (d, *J* = 8.2 Hz, 2H), 7.28 – 7.24 (m, 2H), 7.14 – 7.12 (m, 4H), 4.13 – 4.03 (m, 2H), 3.92 (s, 3H), 3.72 (q, *J* = 7.2 Hz, 1H), 2.60 (t, *J* = 7.7 Hz, 2H), 2.47 (d, *J* = 7.2 Hz, 2H), 1.97 – 1.81 (m, 3H), 1.52 (d, *J* = 7.2 Hz, 3H), 0.90 (d, *J* = 6.6 Hz, 6H).

**<sup>13</sup>C NMR** (151 MHz, CDCl<sub>3</sub>) δ 174.63, 167.03, 146.64, 140.59, 137.81, 129.71, 129.32, 128.41, 127.97, 127.16, 63.47, 51.95, 45.16, 45.00, 31.95, 30.16, 29.82, 22.33, 18.25.

*m/z*: [M + Na]<sup>+</sup> Calcd for C<sub>24</sub>H<sub>30</sub>NaO<sub>4</sub><sup>+</sup> 405.2036; Found 405.2059.

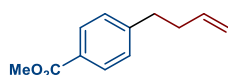

**methyl 4-(but-3-en-1-yl)benzoate**<sup>[8]</sup>: Yellow oil (81% yield.). The product was purified by silica gel column chromatography, using petroleum ether/EA = 60/1 (v/v) as an eluent.

**<sup>1</sup>H NMR** (400 MHz, Chloroform-*d*) δ 7.87 (d, *J* = 7.6 Hz, 2H), 7.16 (d, *J* = 7.6 Hz, 2H), 5.80 - 5.67 (m, 1H), 4.97 - 4.88 (m, 2H), 3.81 (s, 3H), 2.68 (t, *J* = 7.6 Hz, 2H), 2.30 (m, 2H).

**<sup>13</sup>C NMR** (101 MHz, CDCl<sub>3</sub>) δ 167.07, 147.27, 137.40, 129.60, 128.42, 127.80, 115.29, 51.89, 35.30, 34.99.

## 9. NMR Spectra of Products

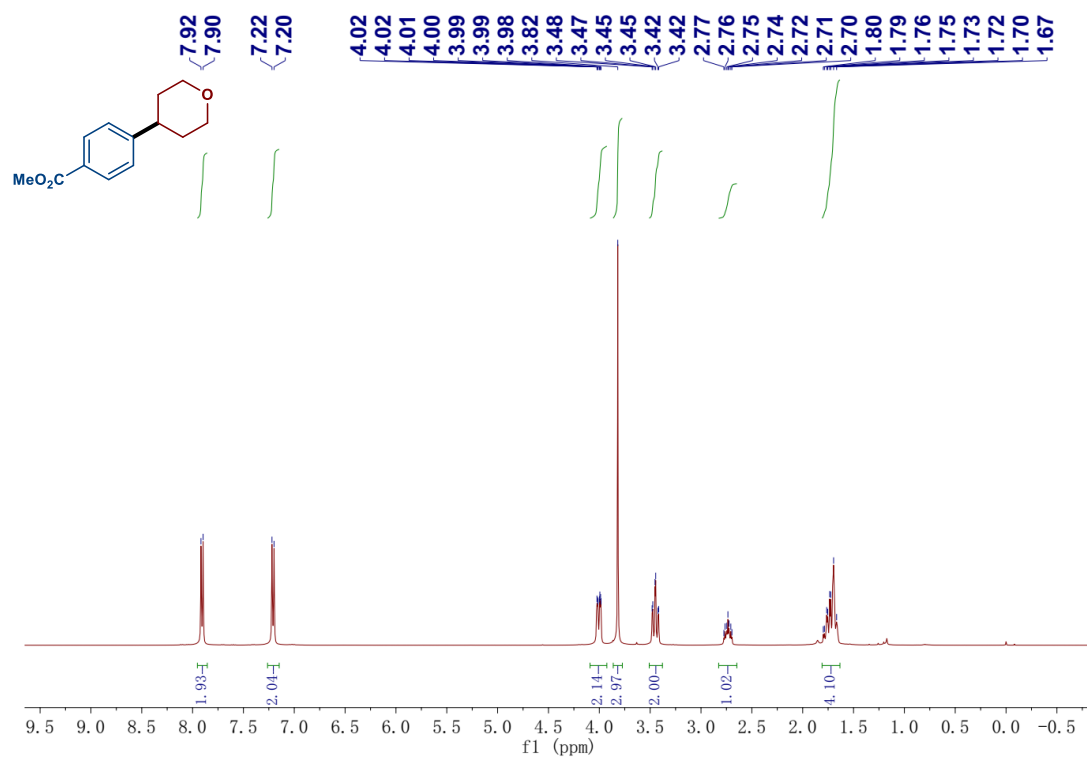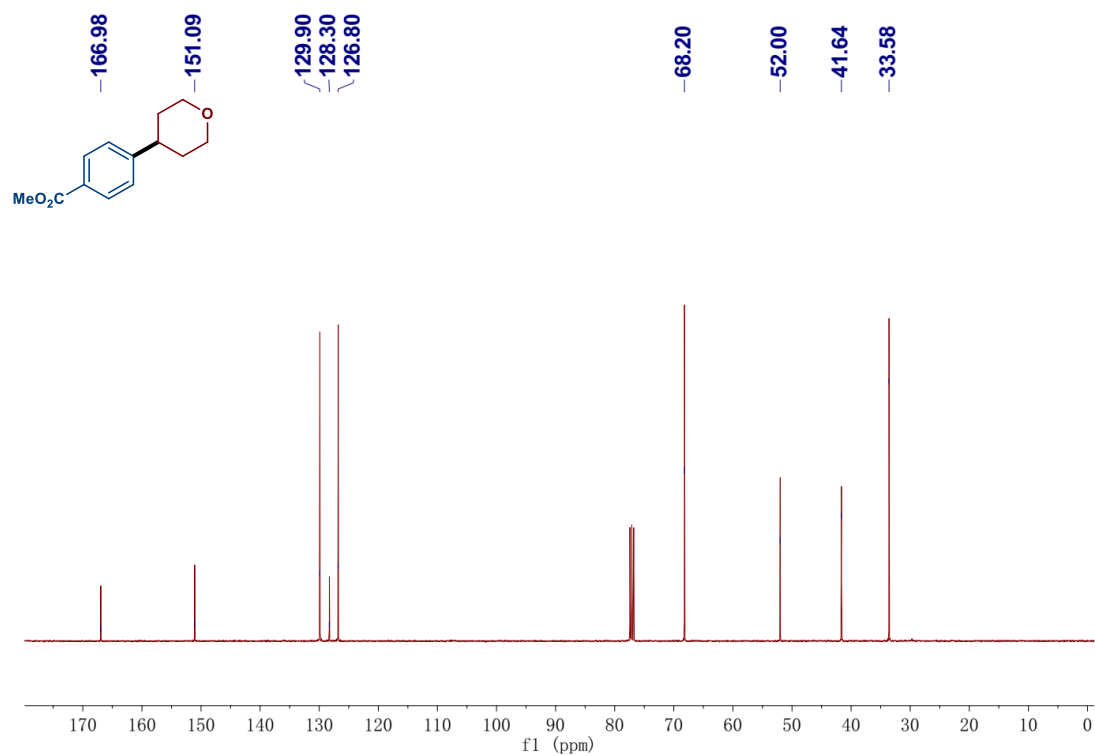

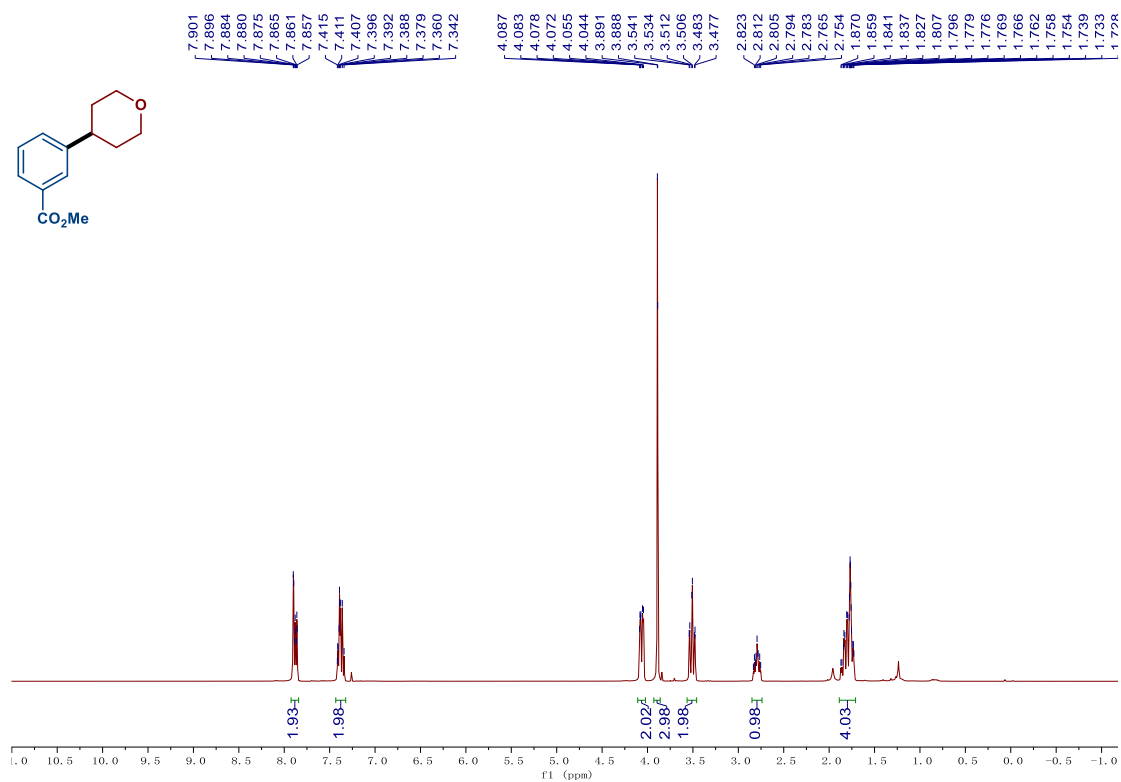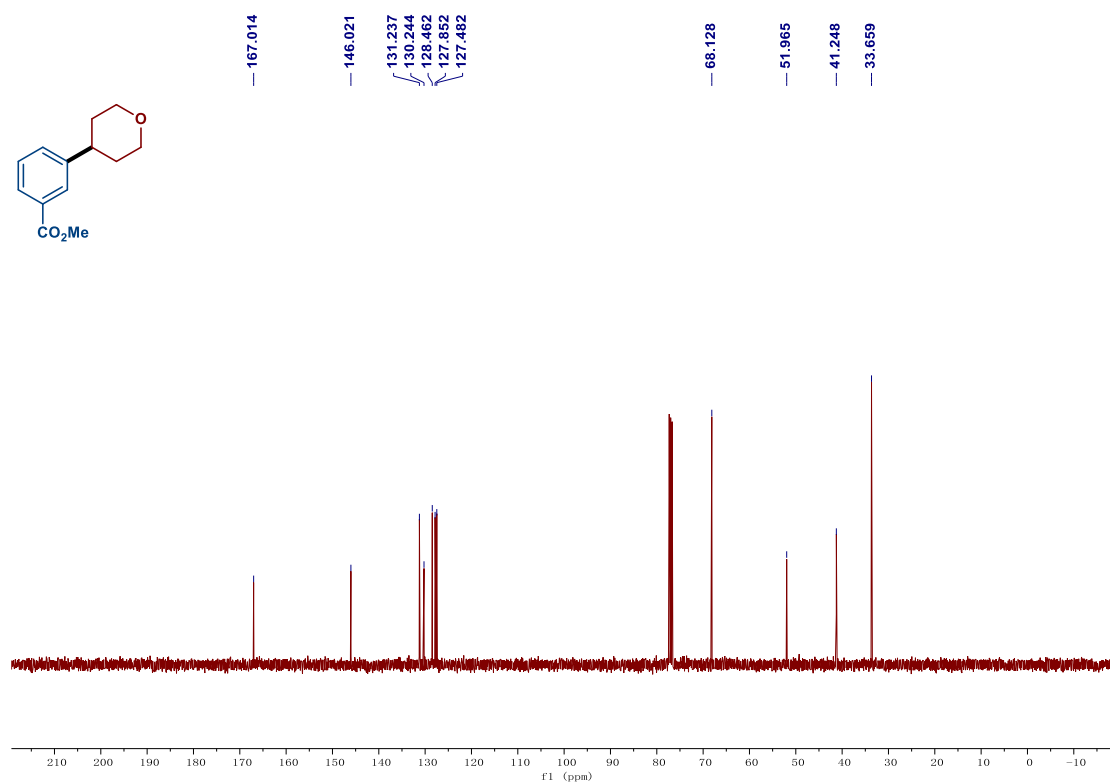



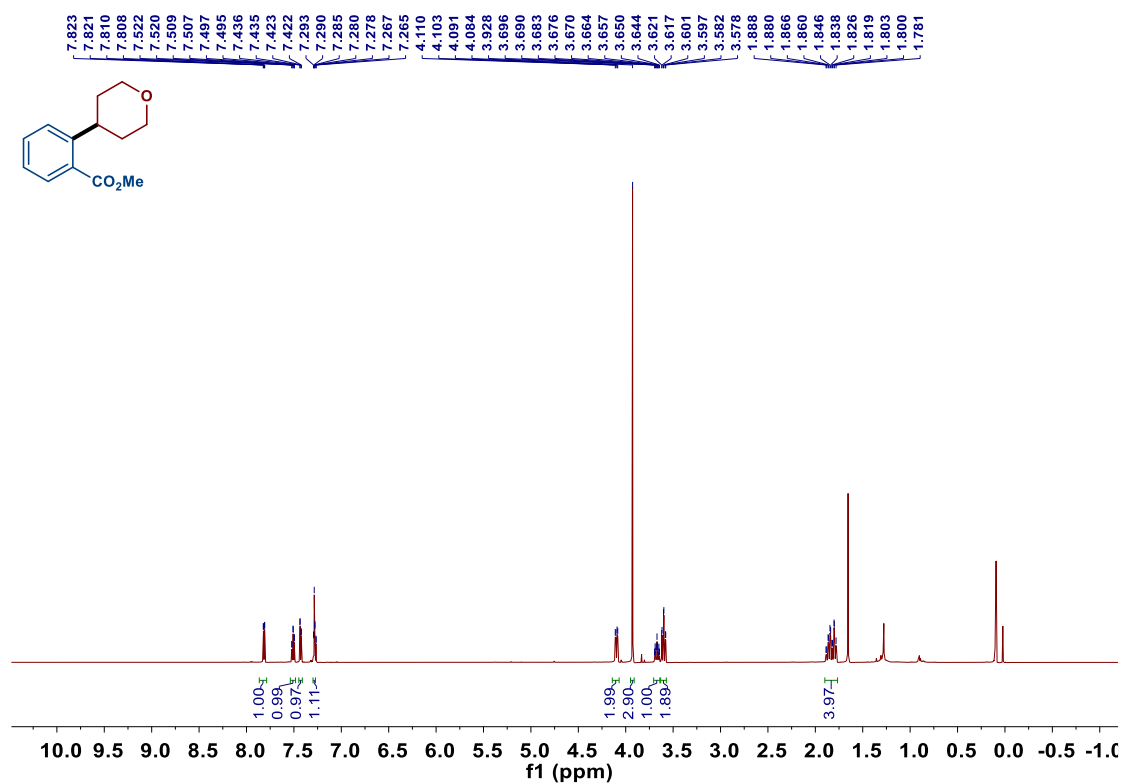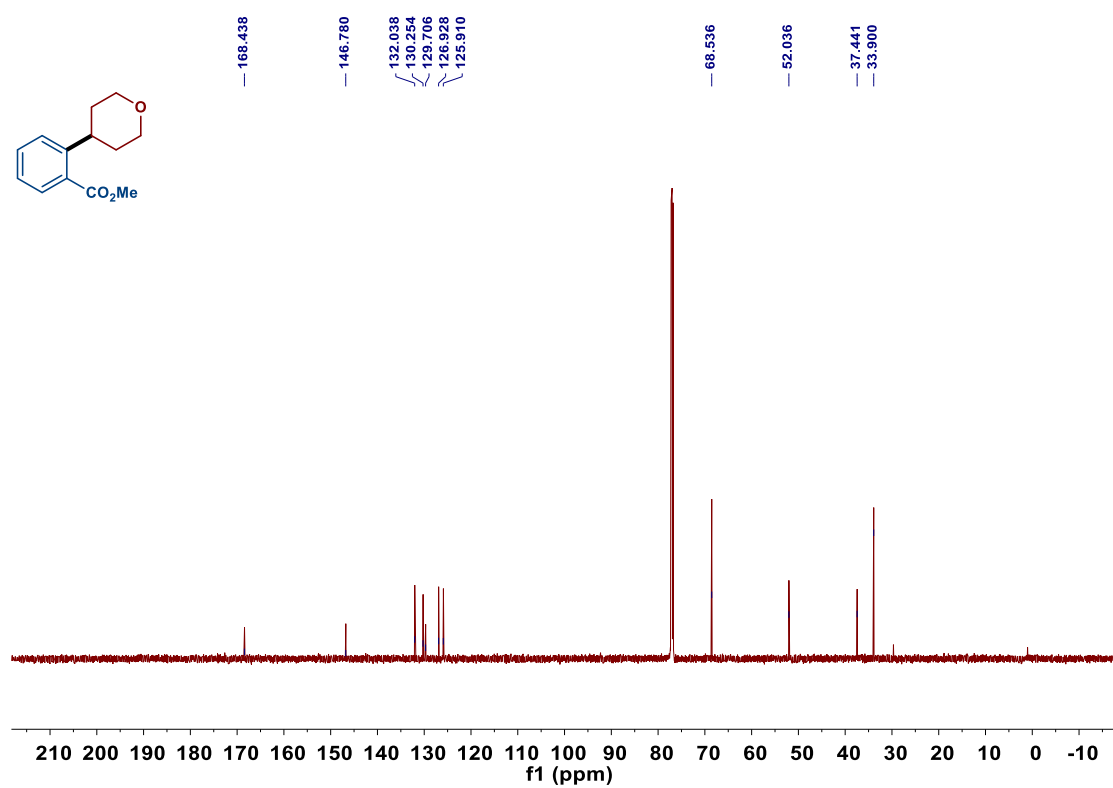

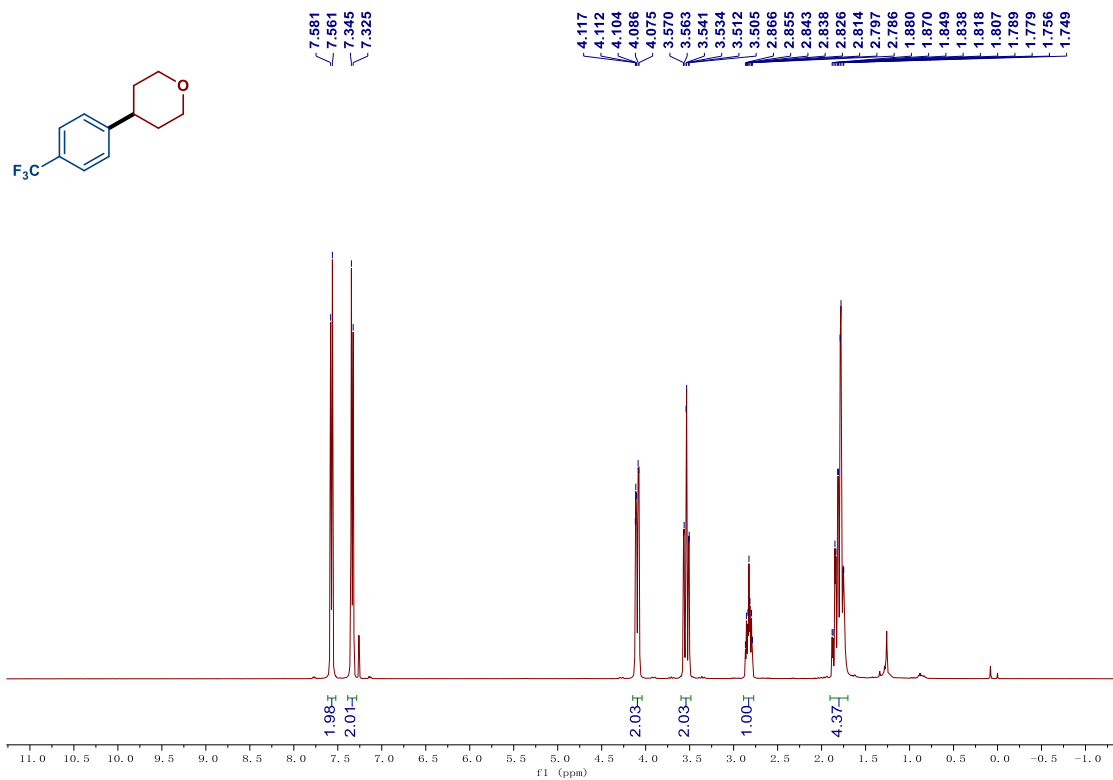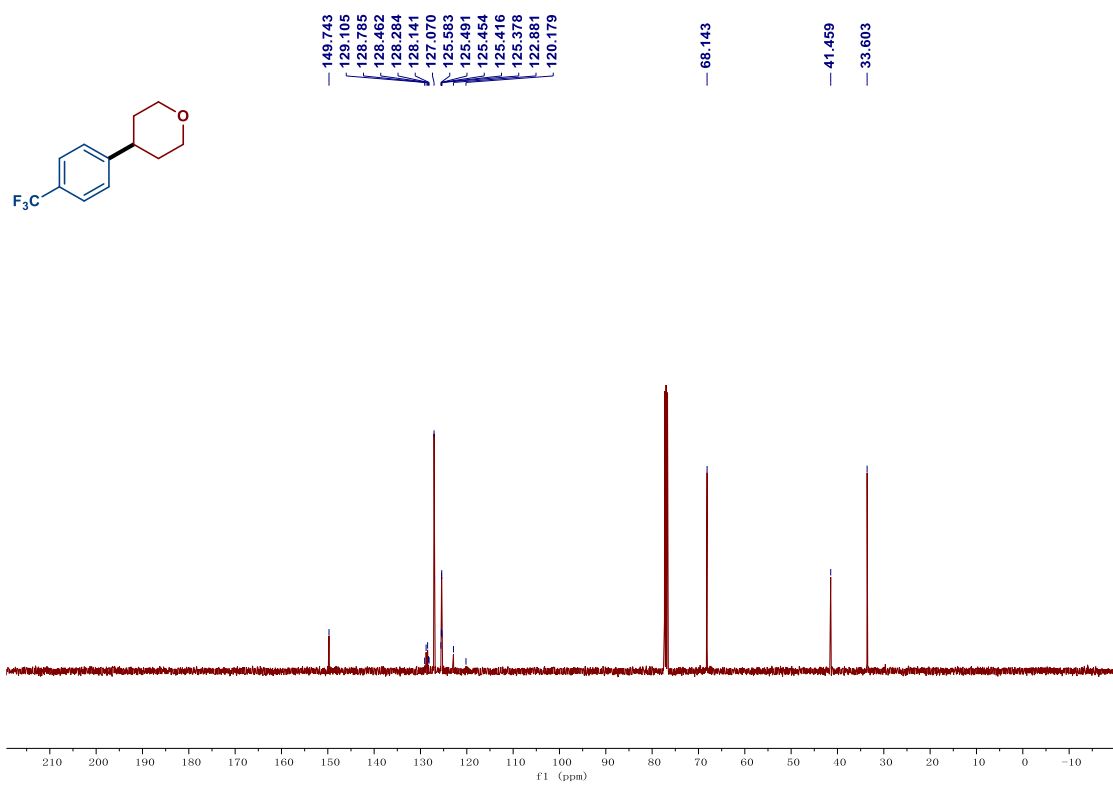

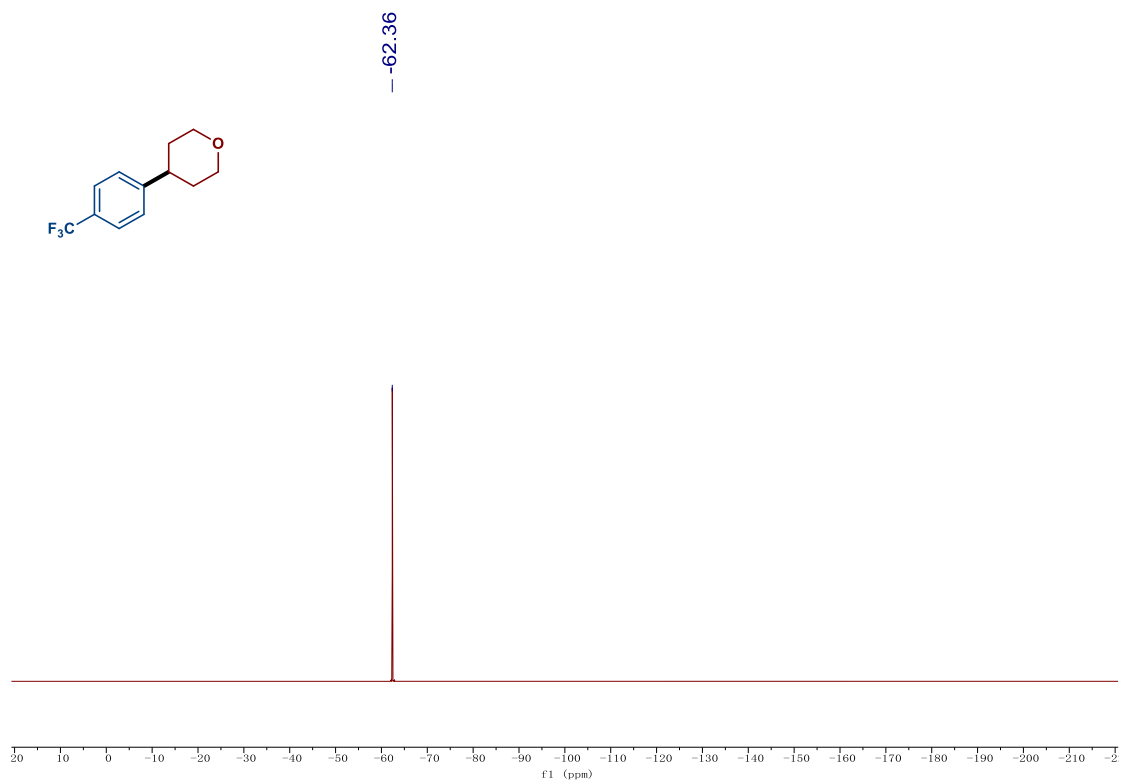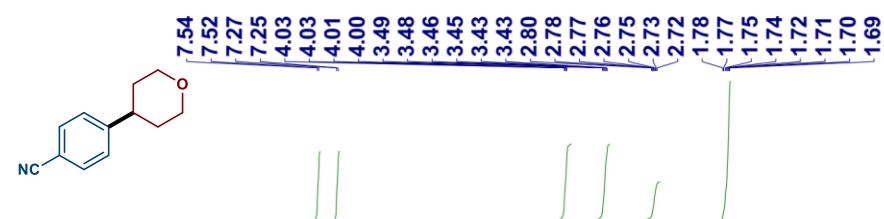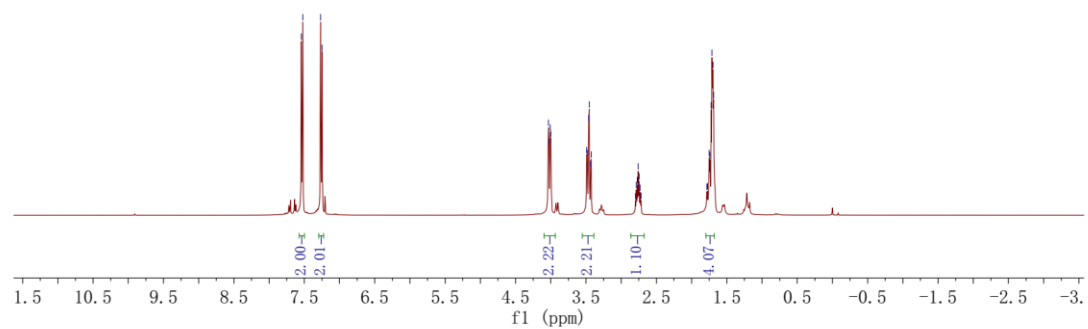

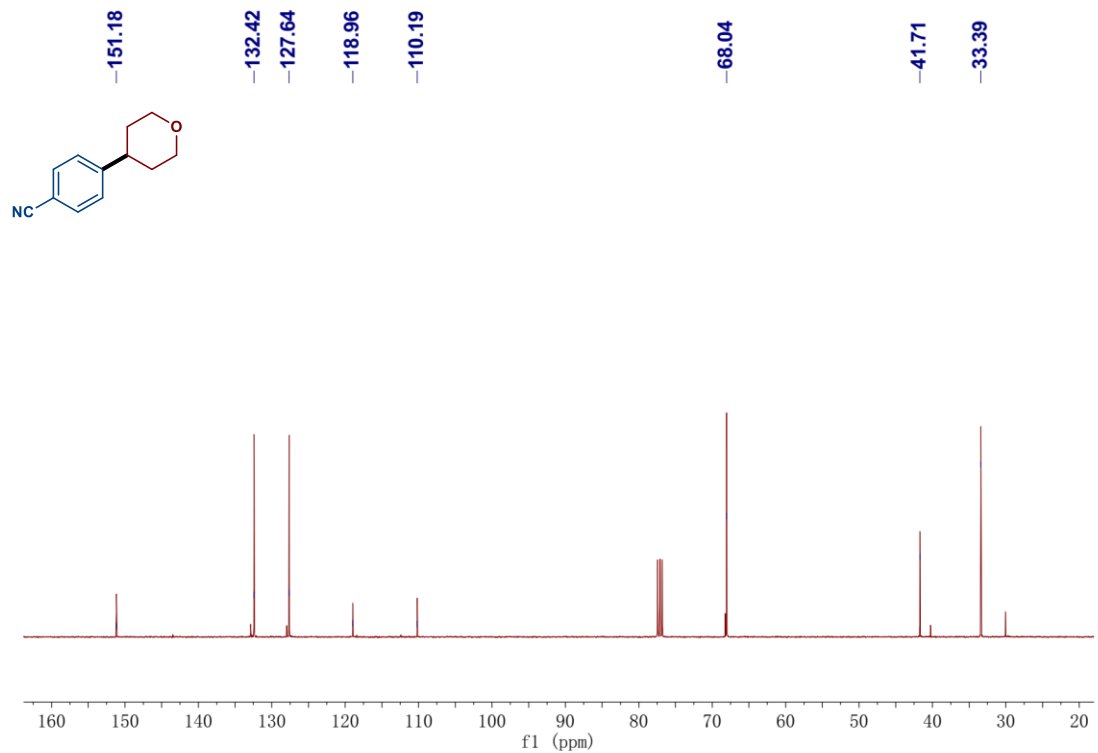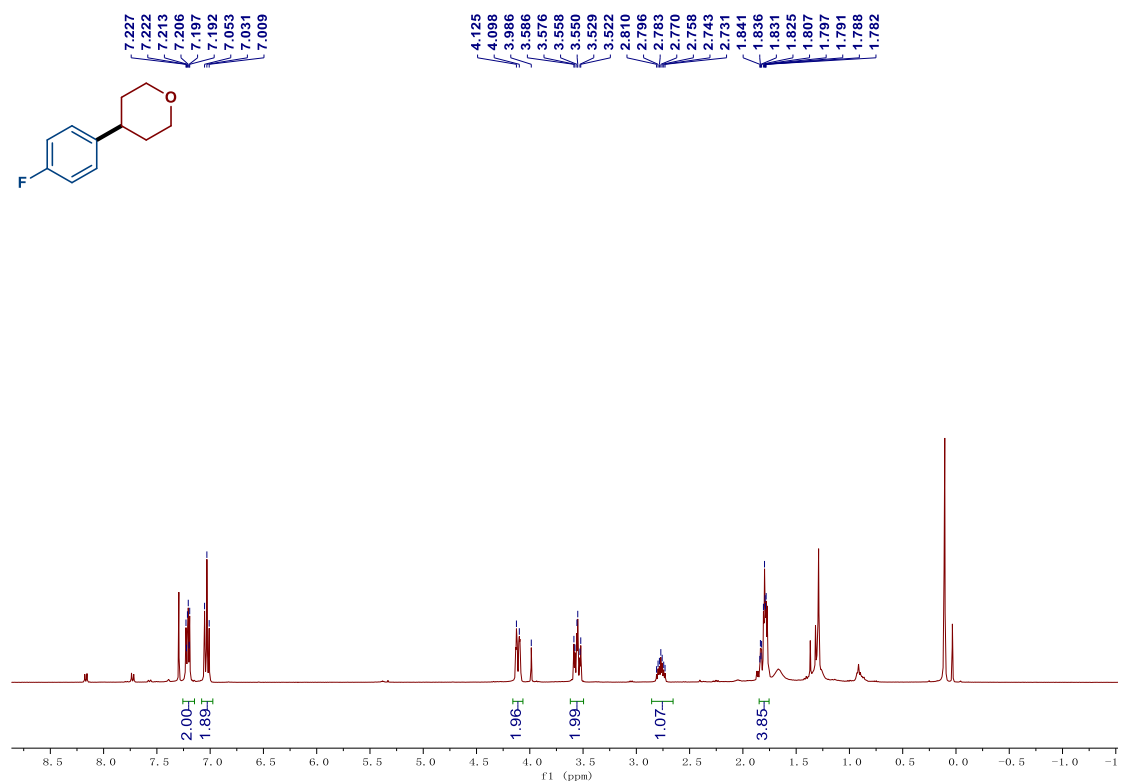

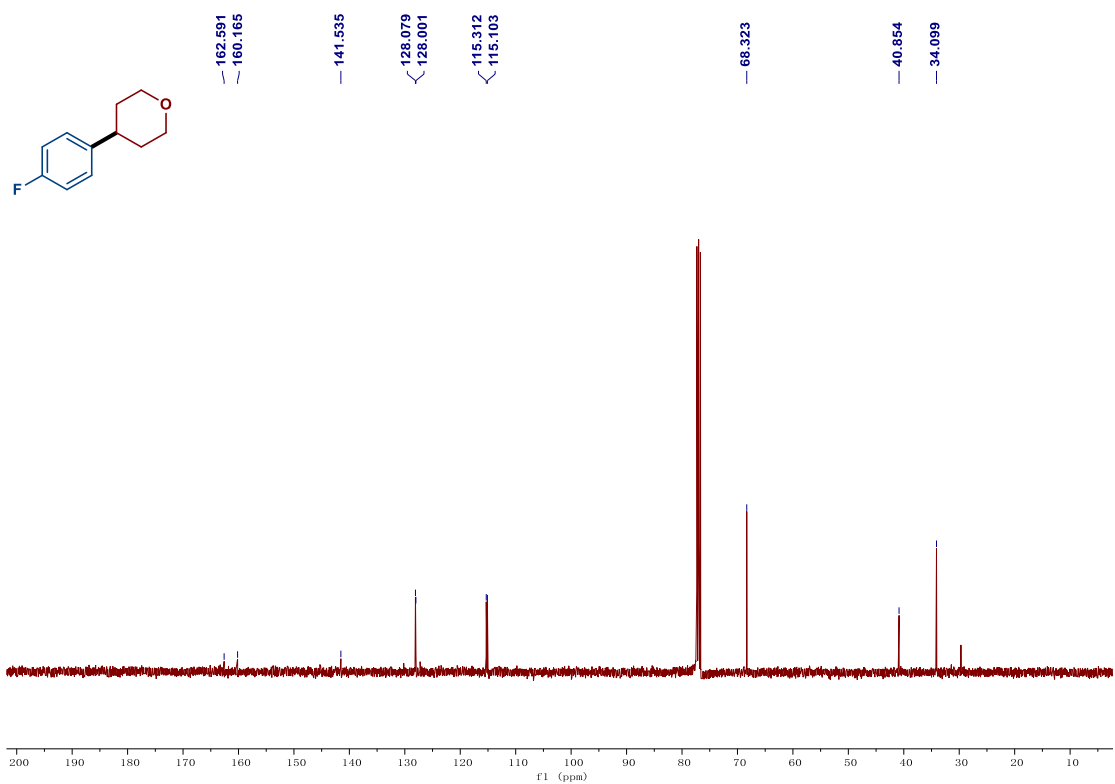

P11/3

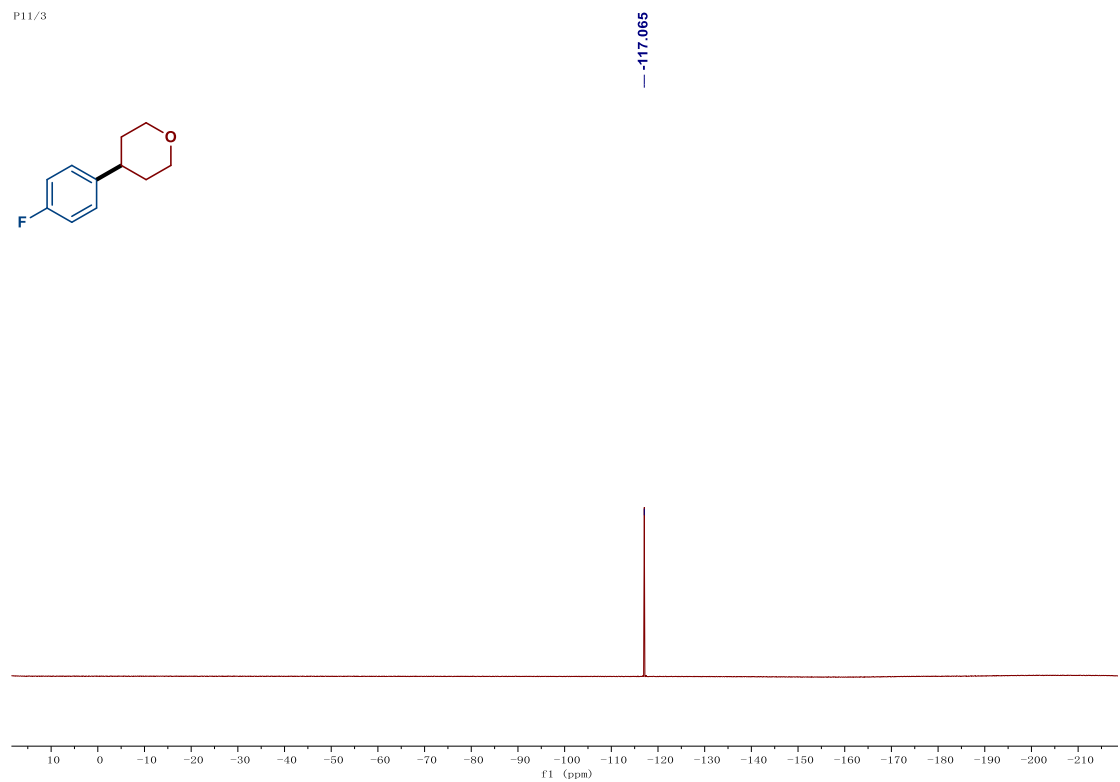

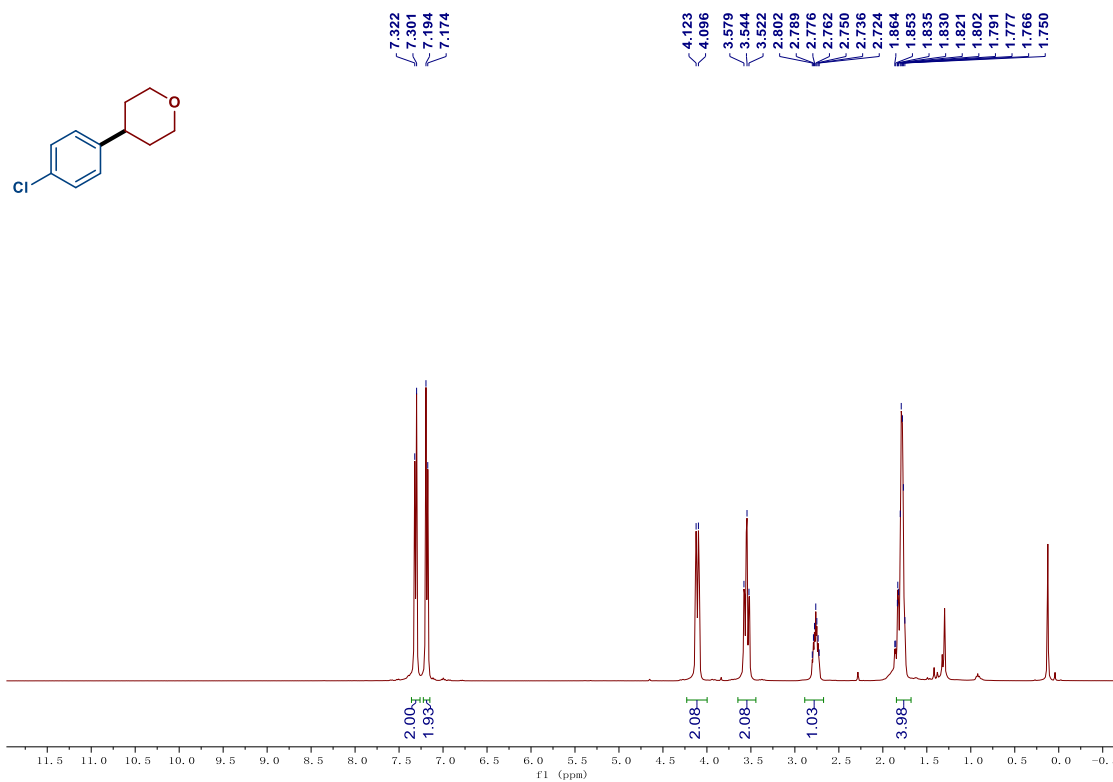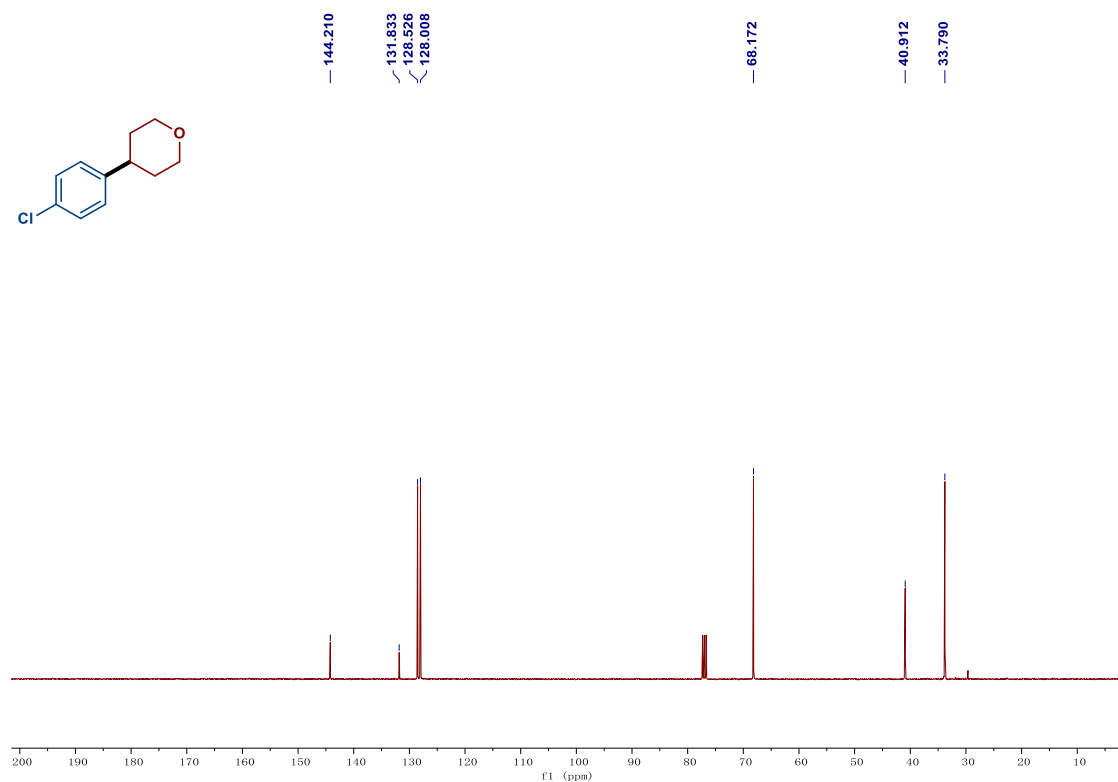

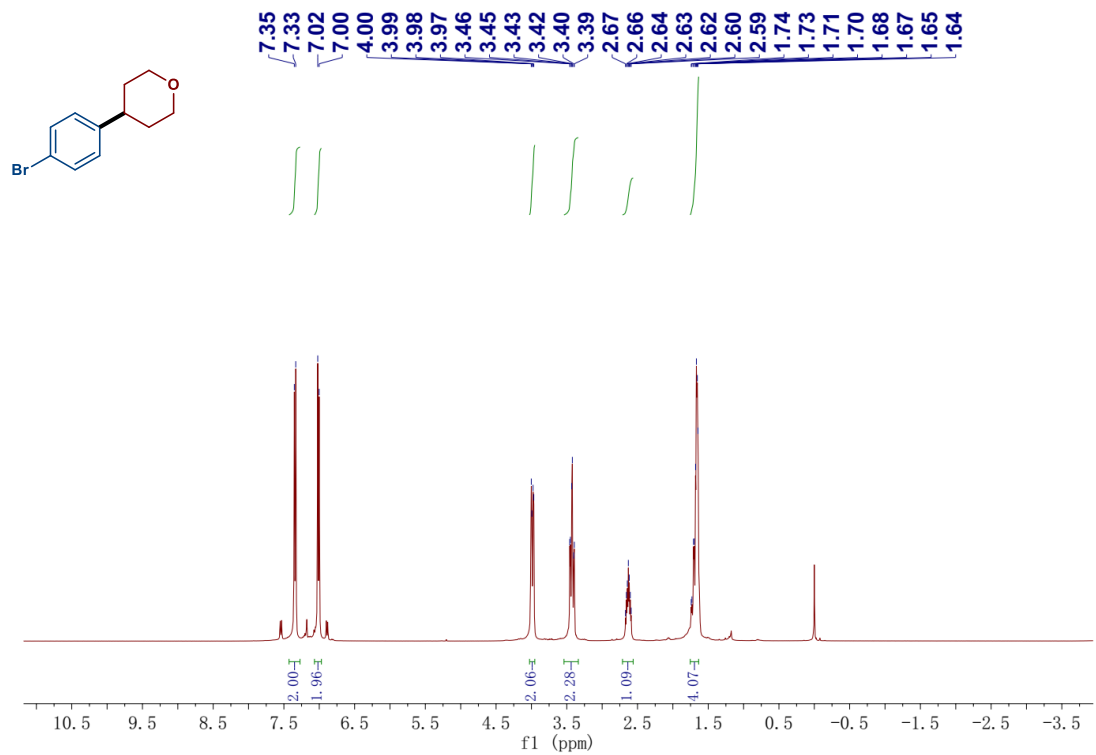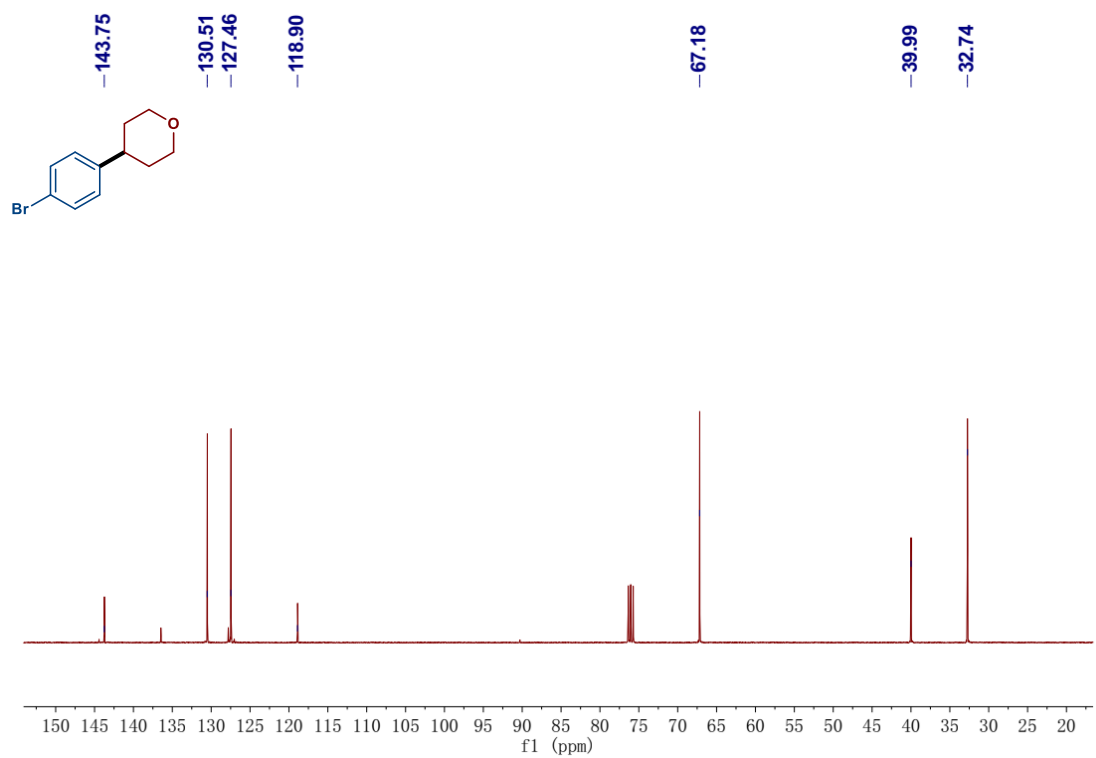

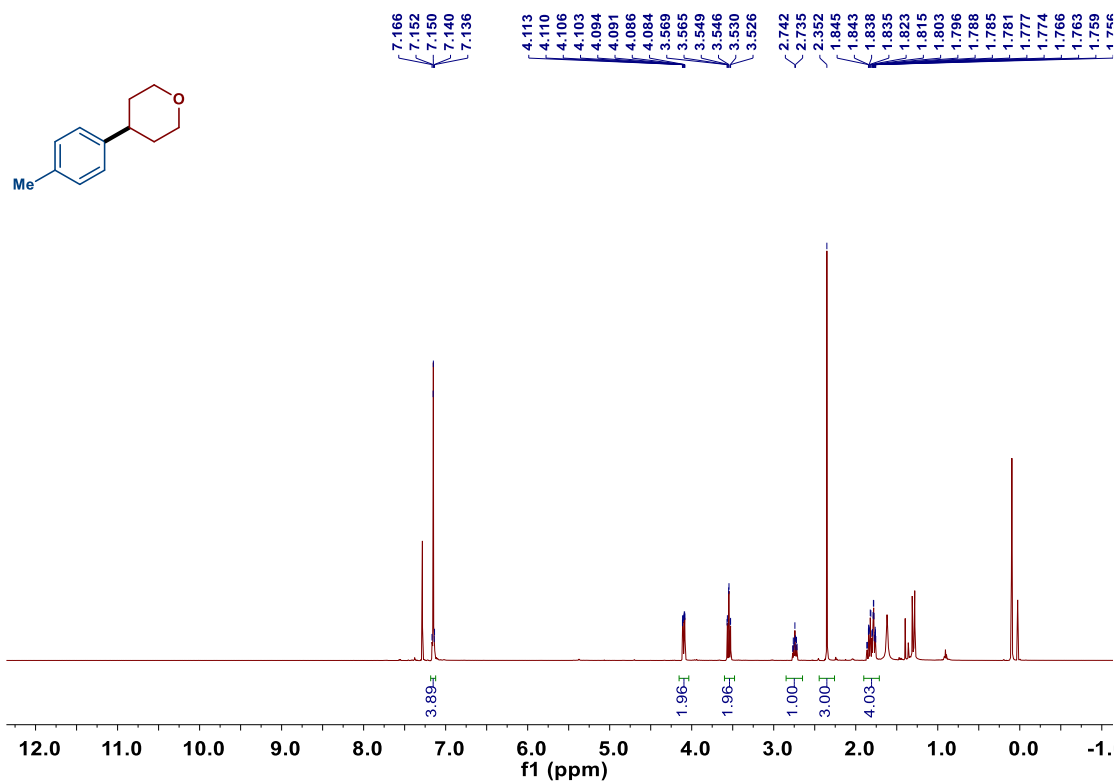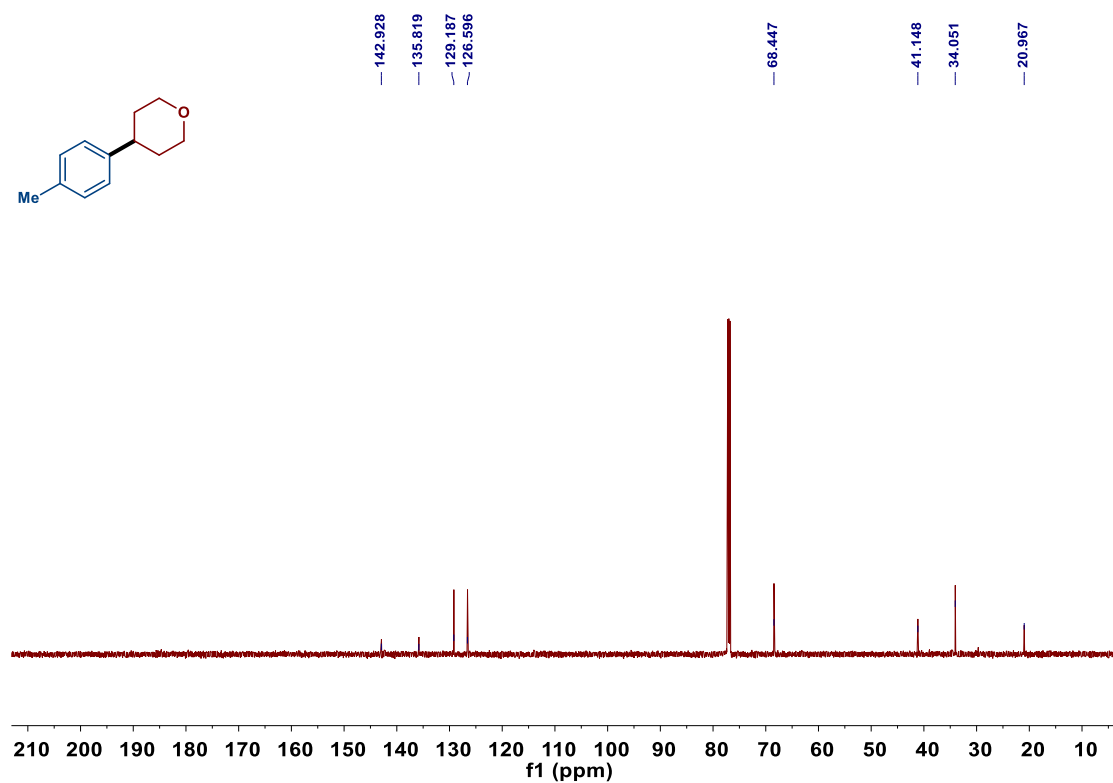



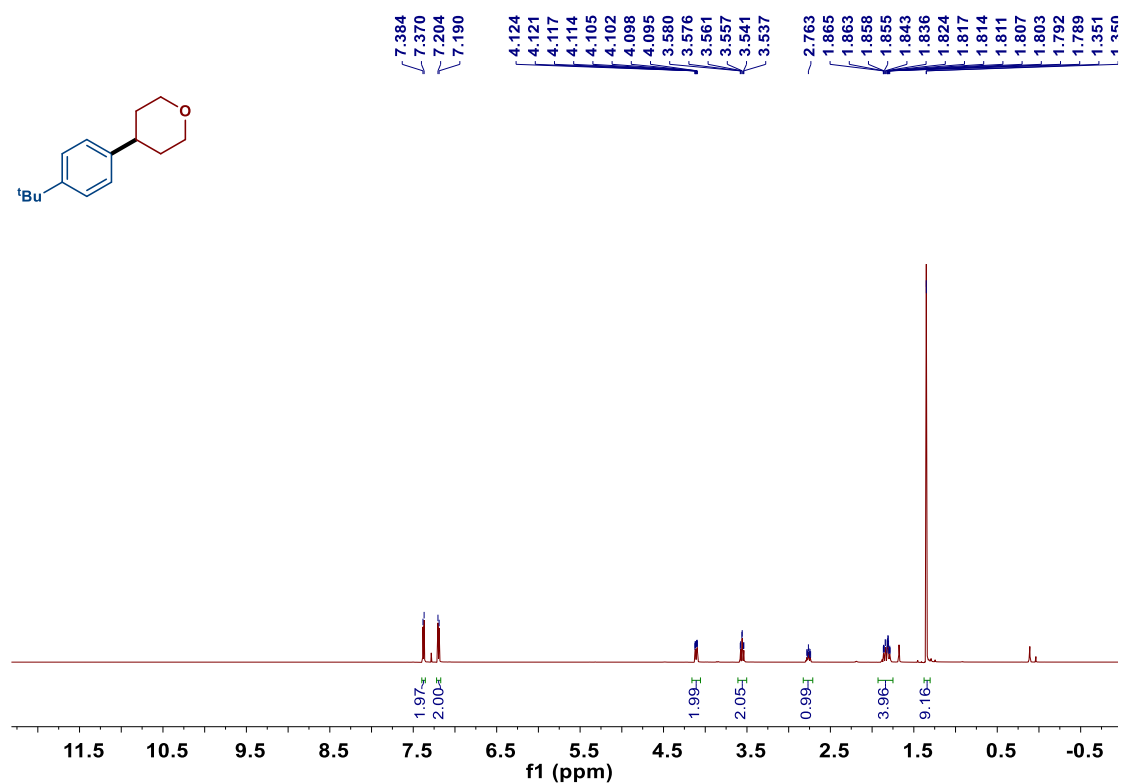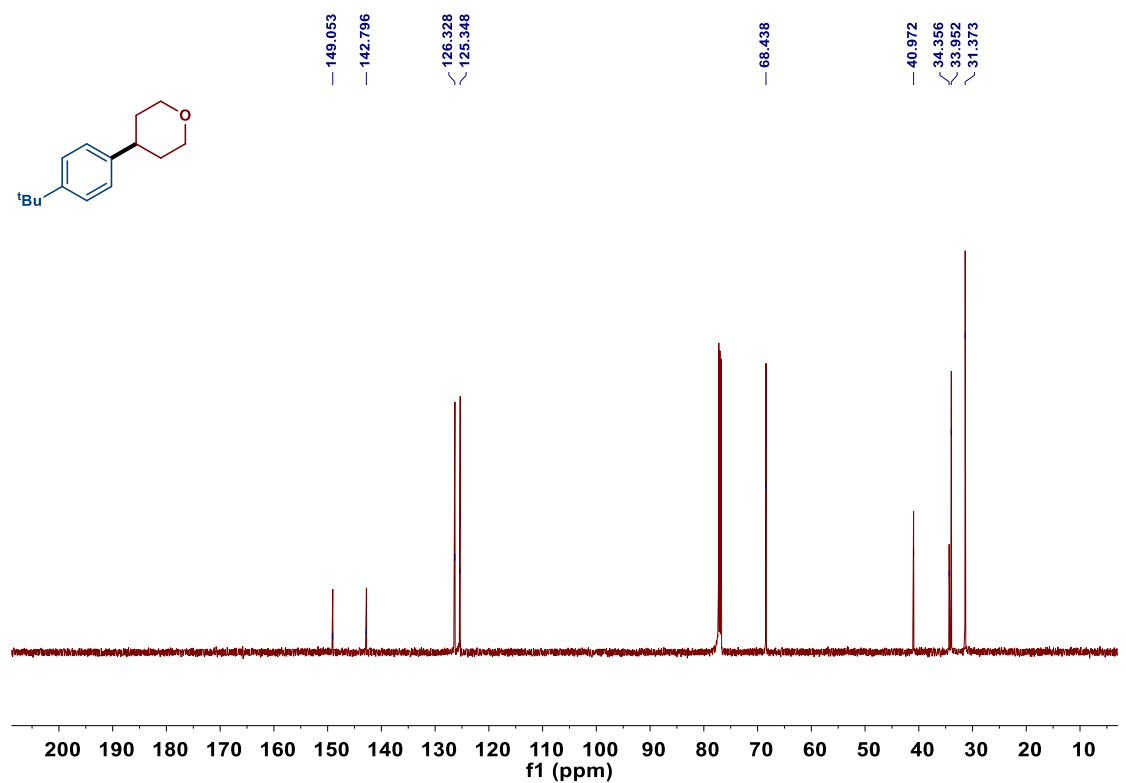

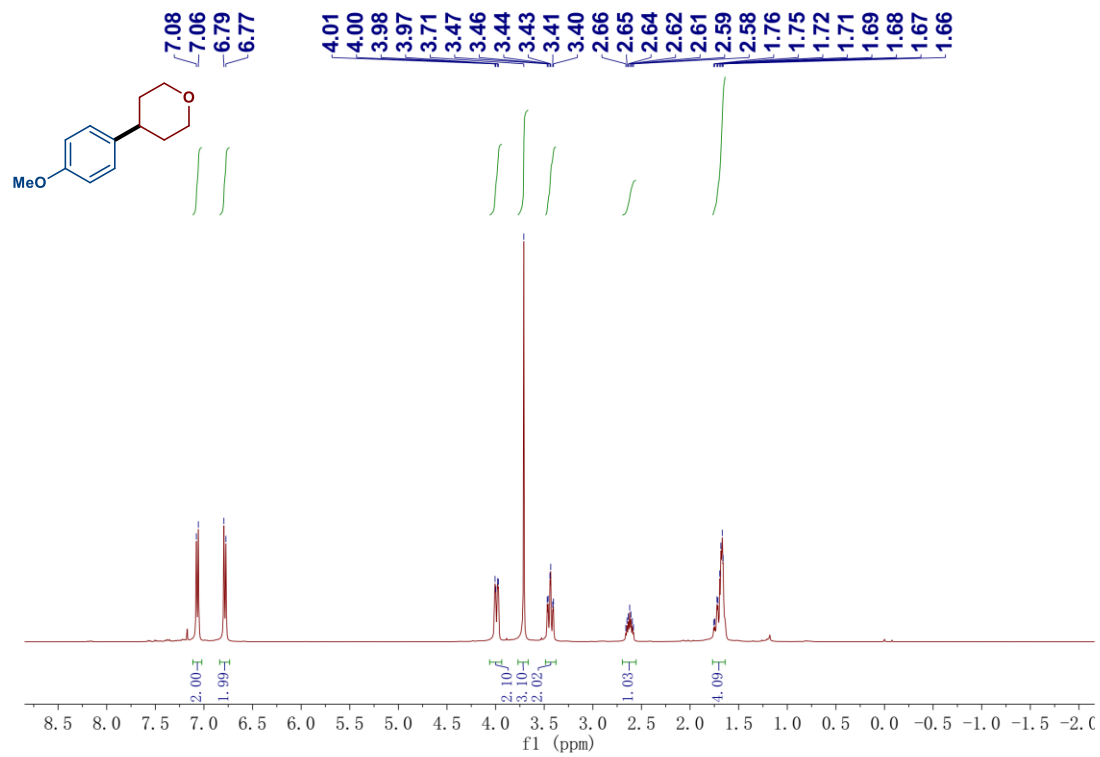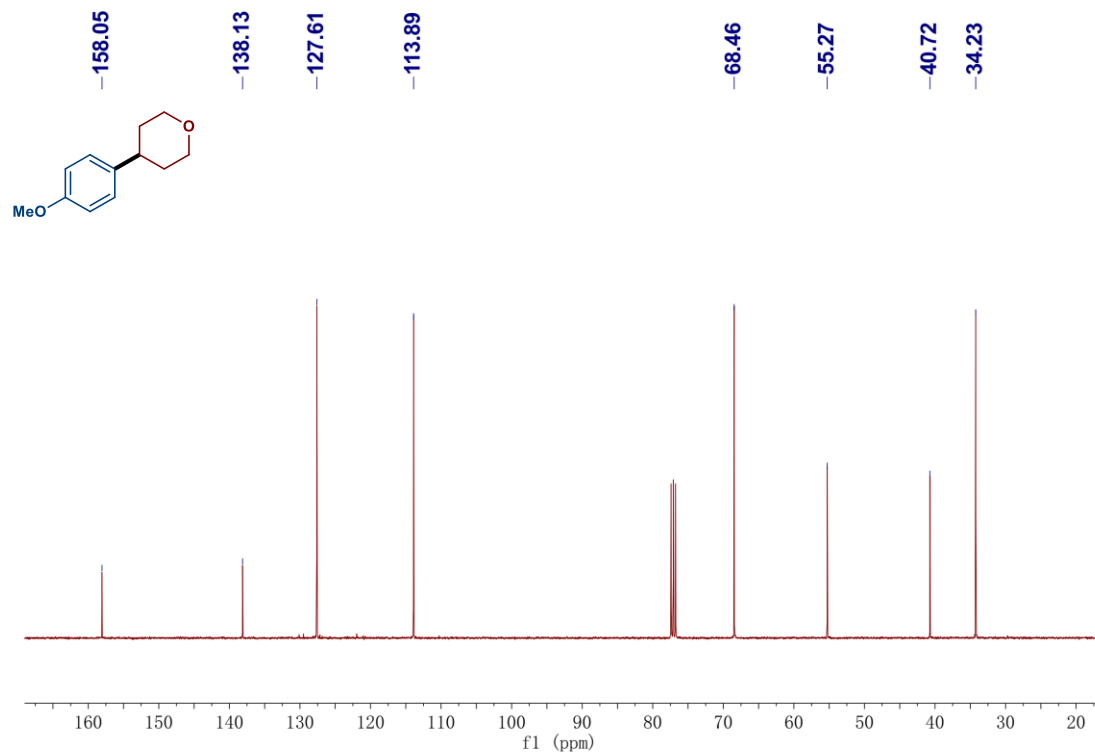

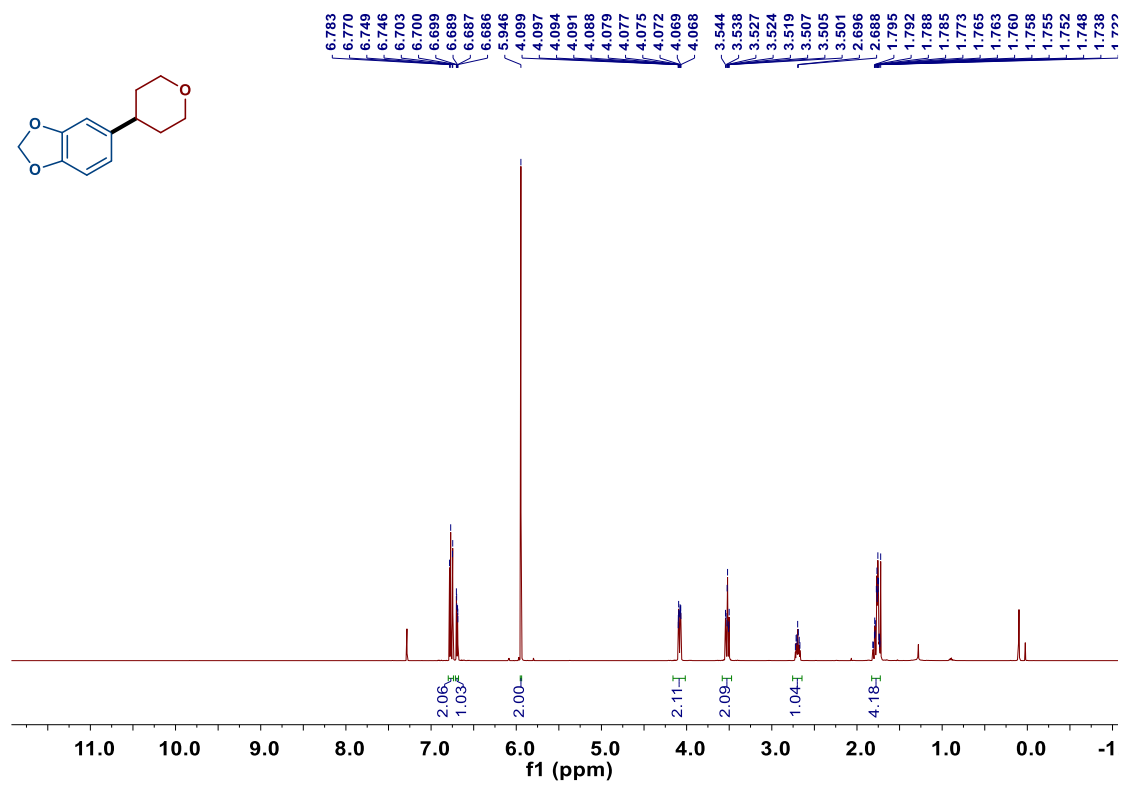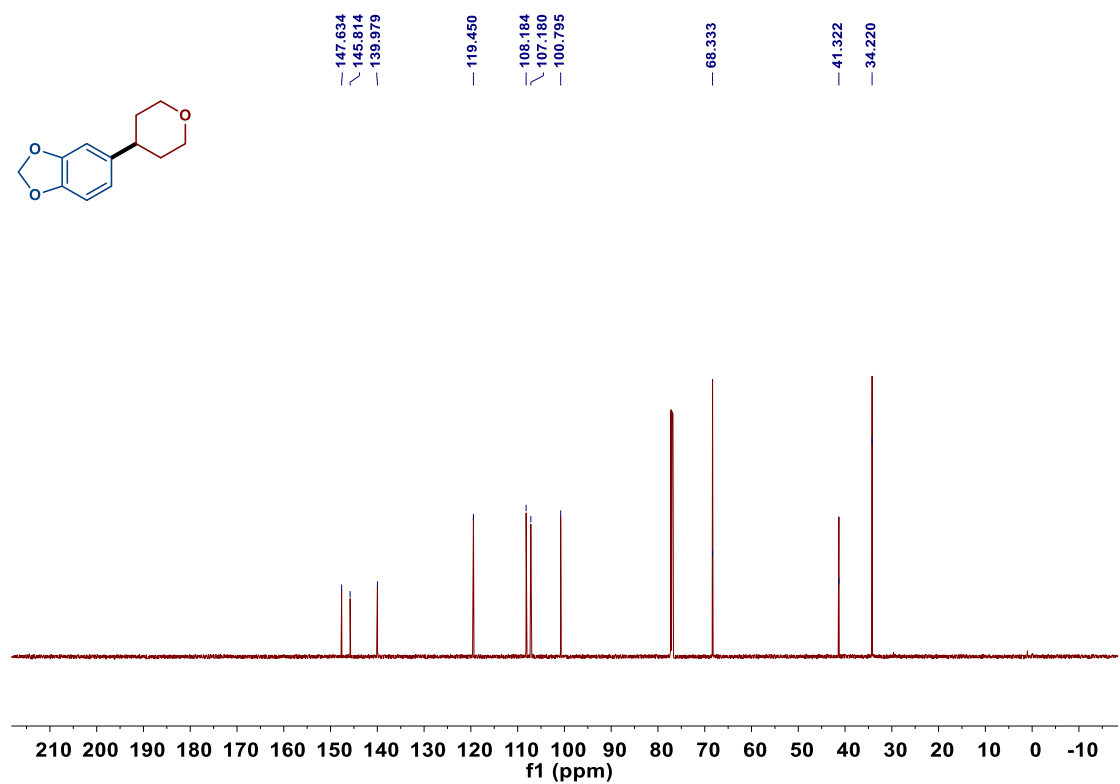

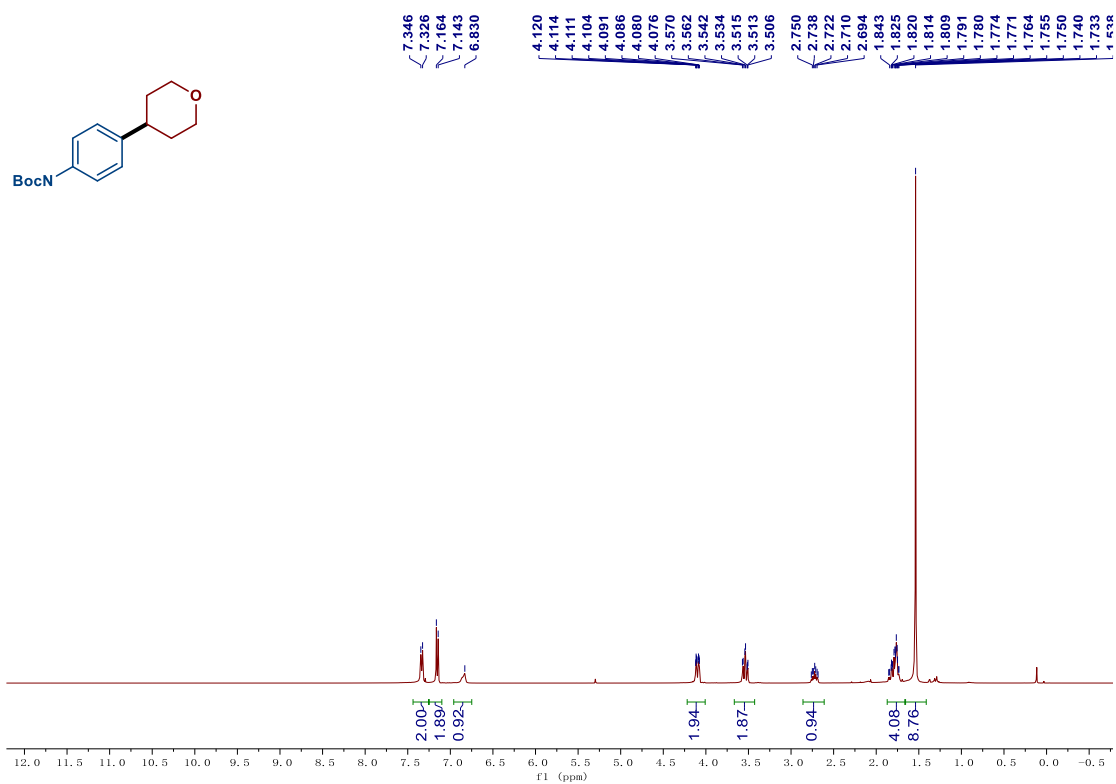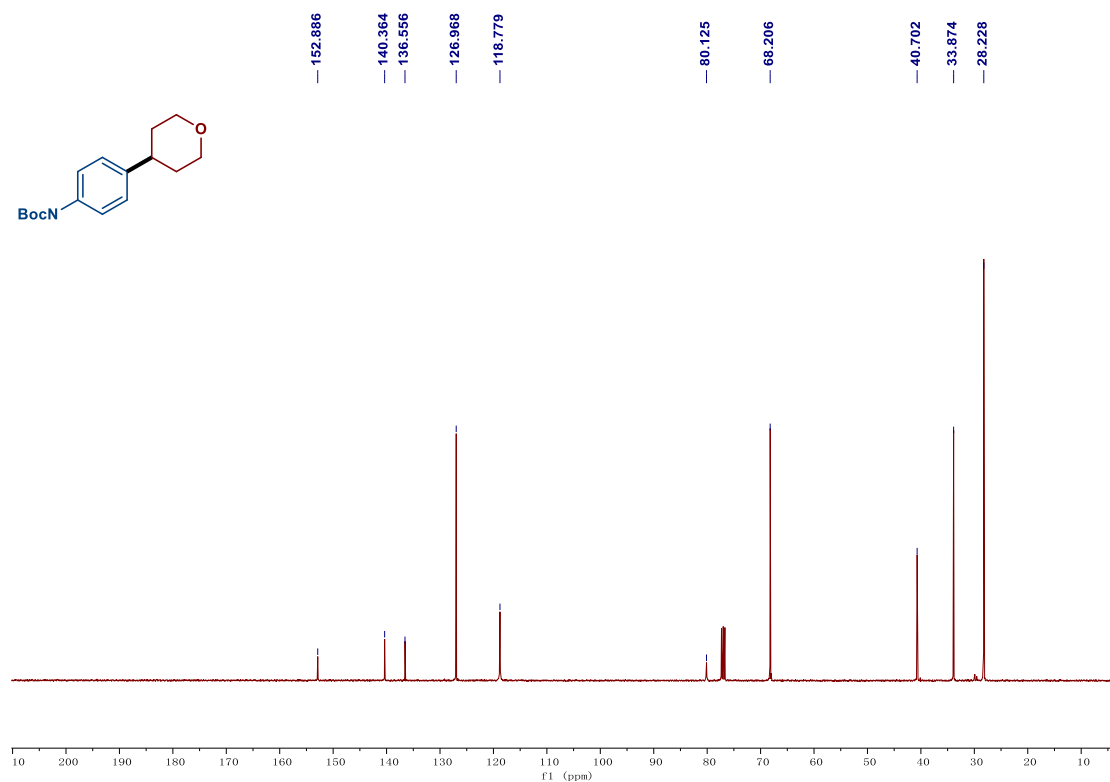

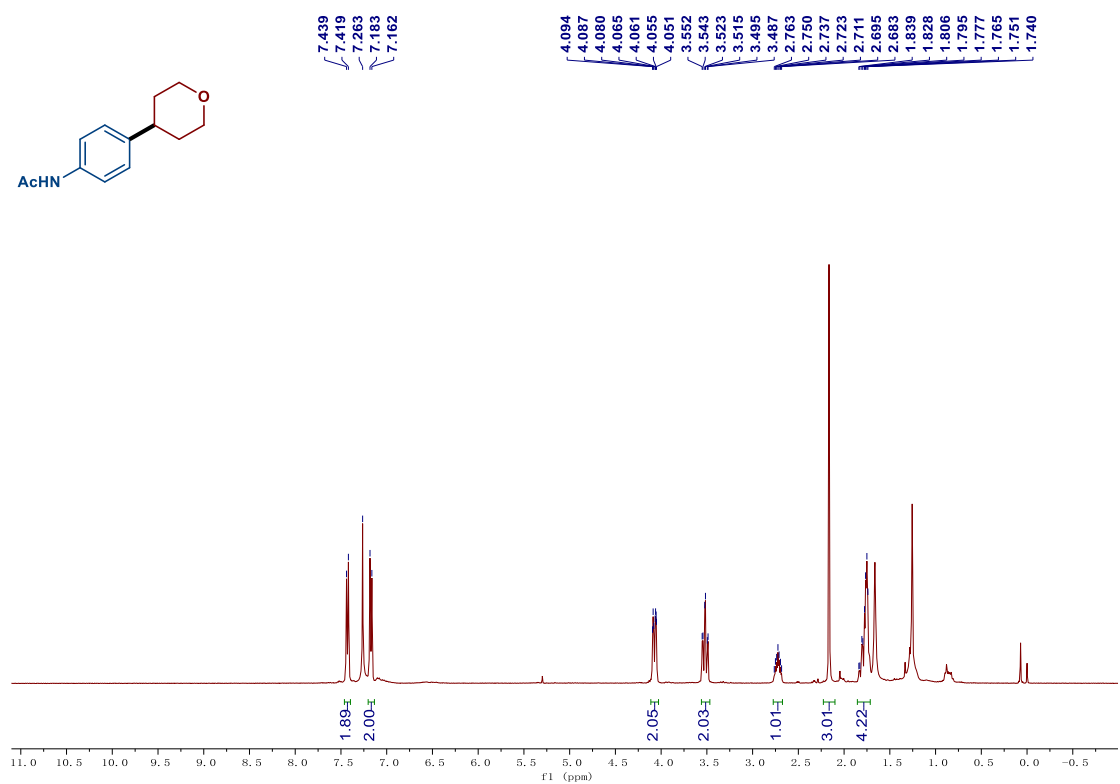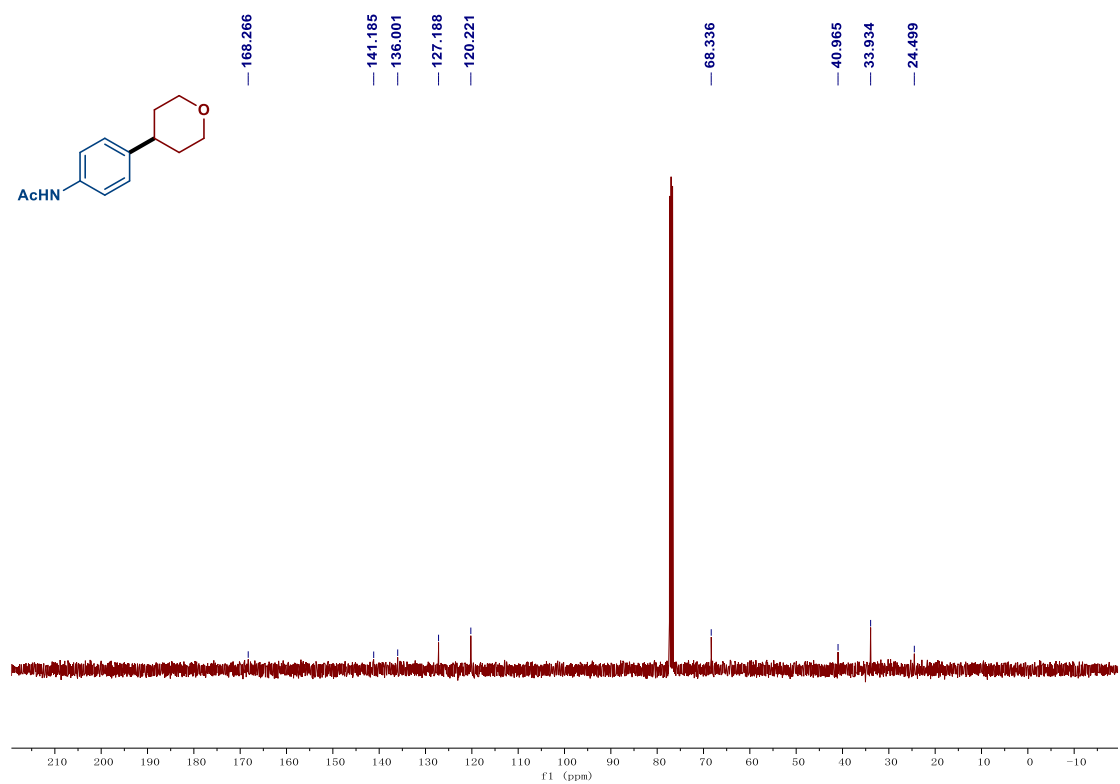

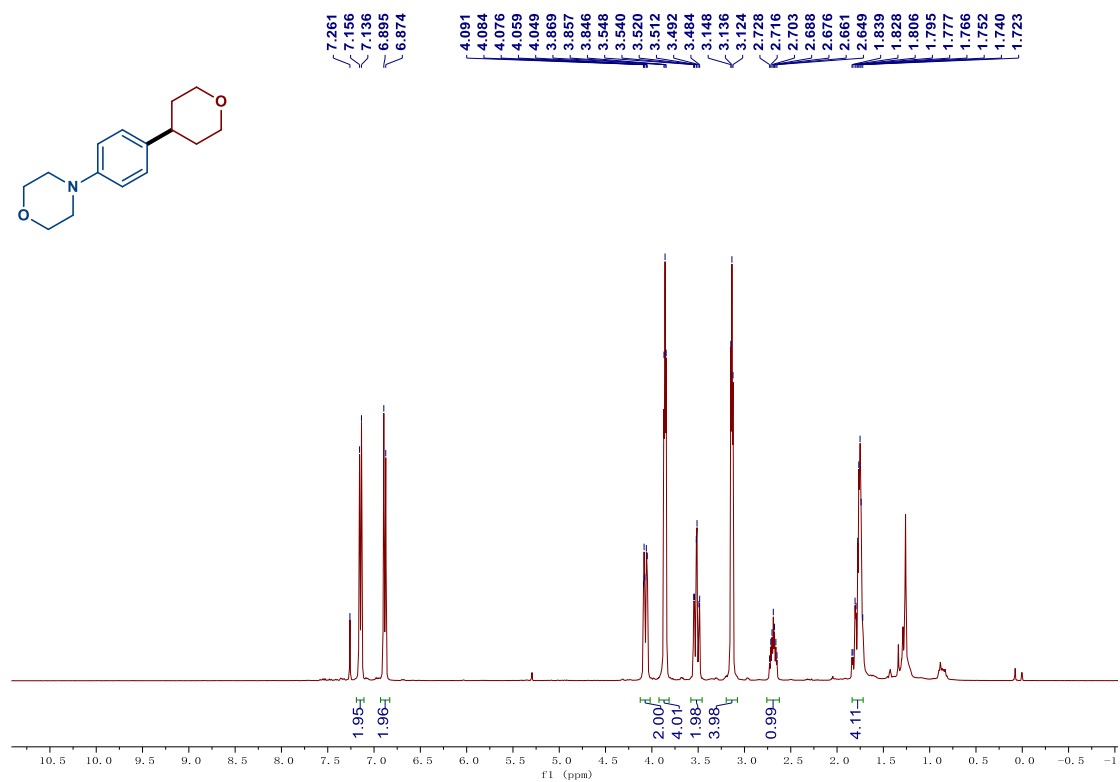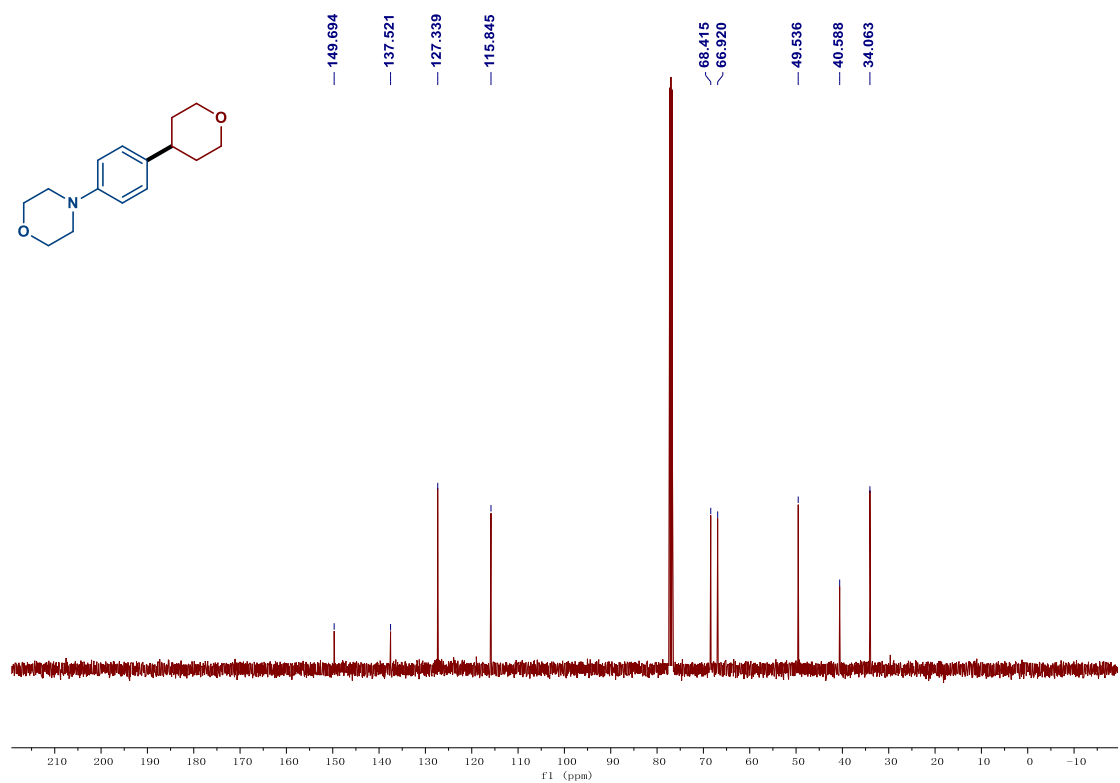

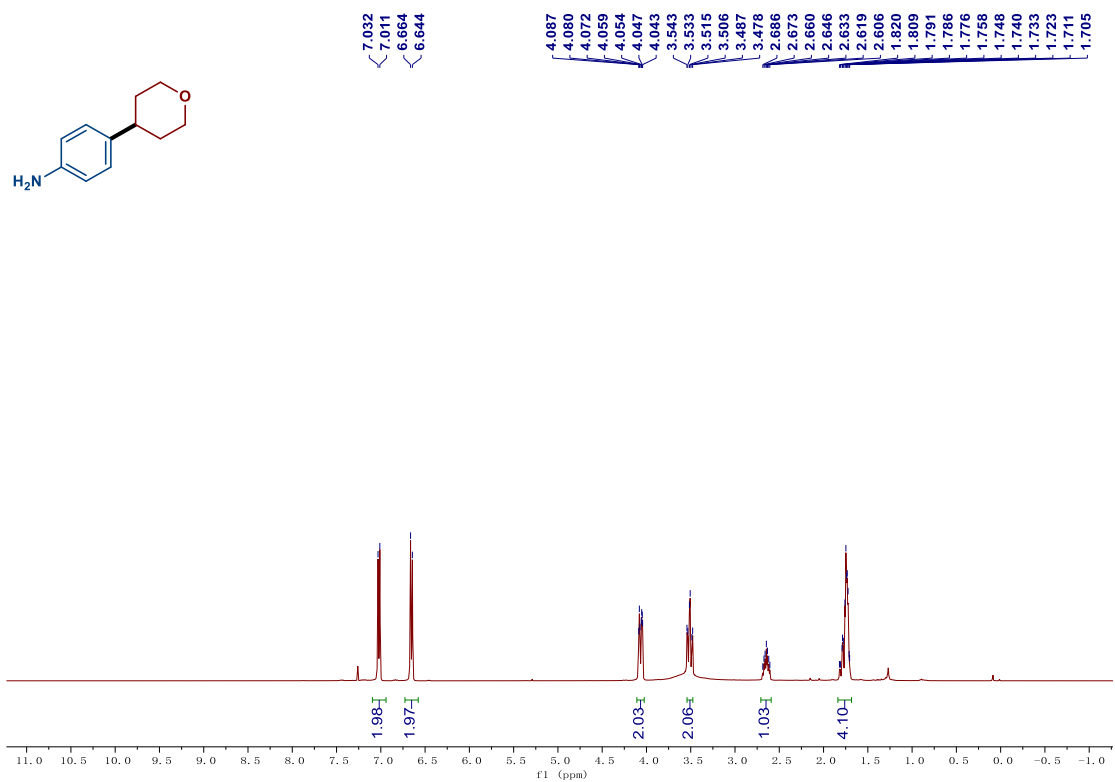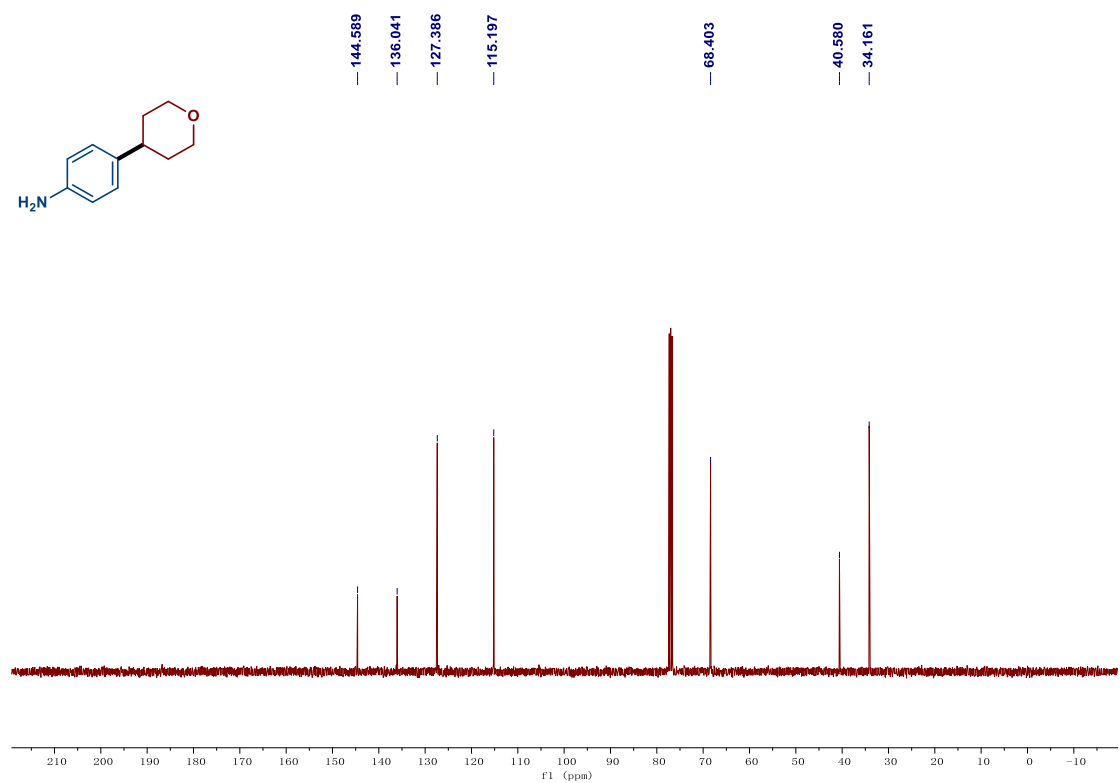

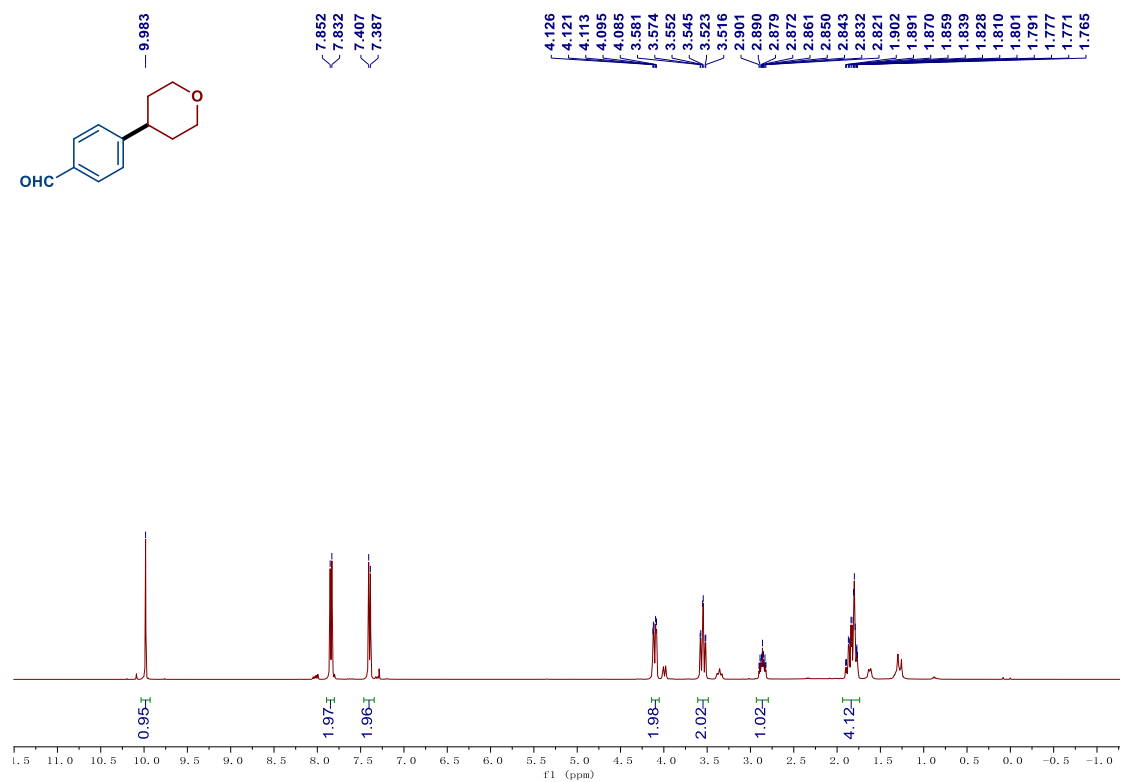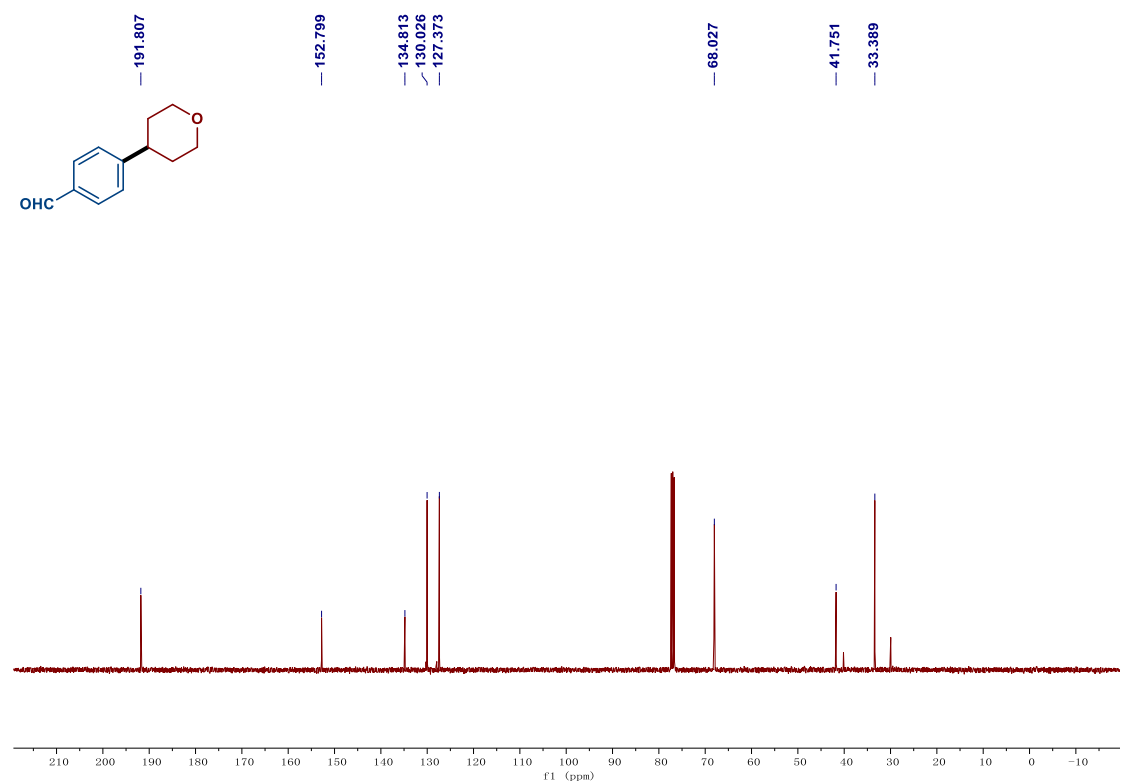



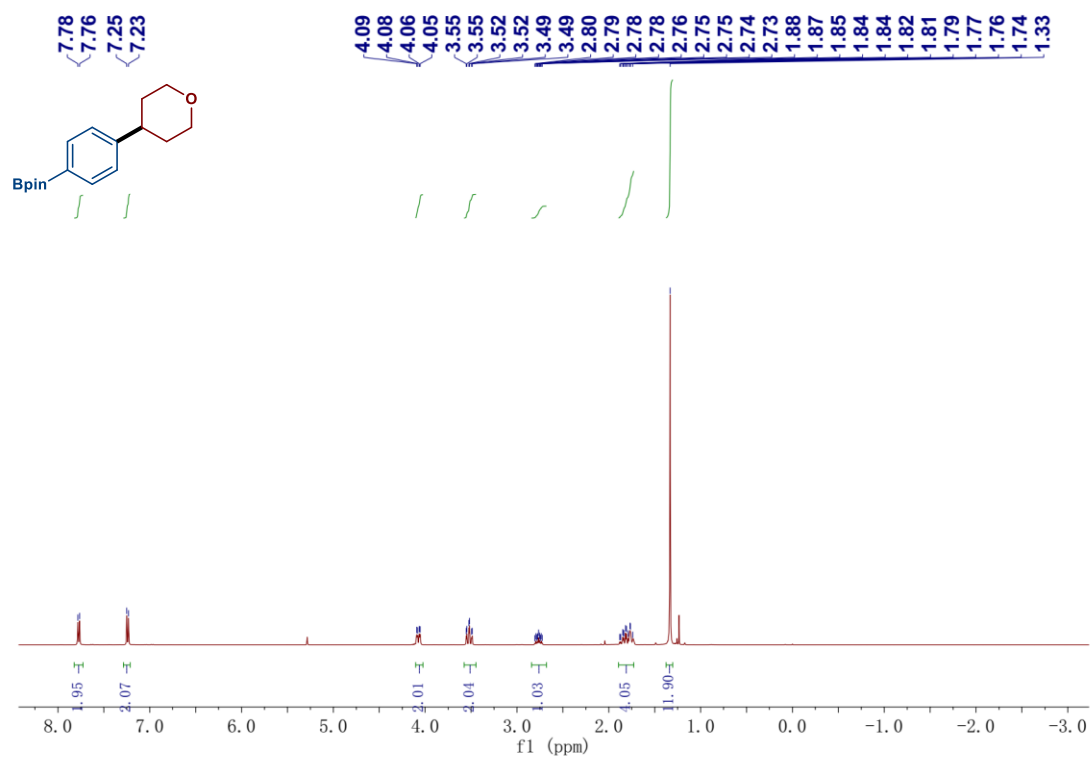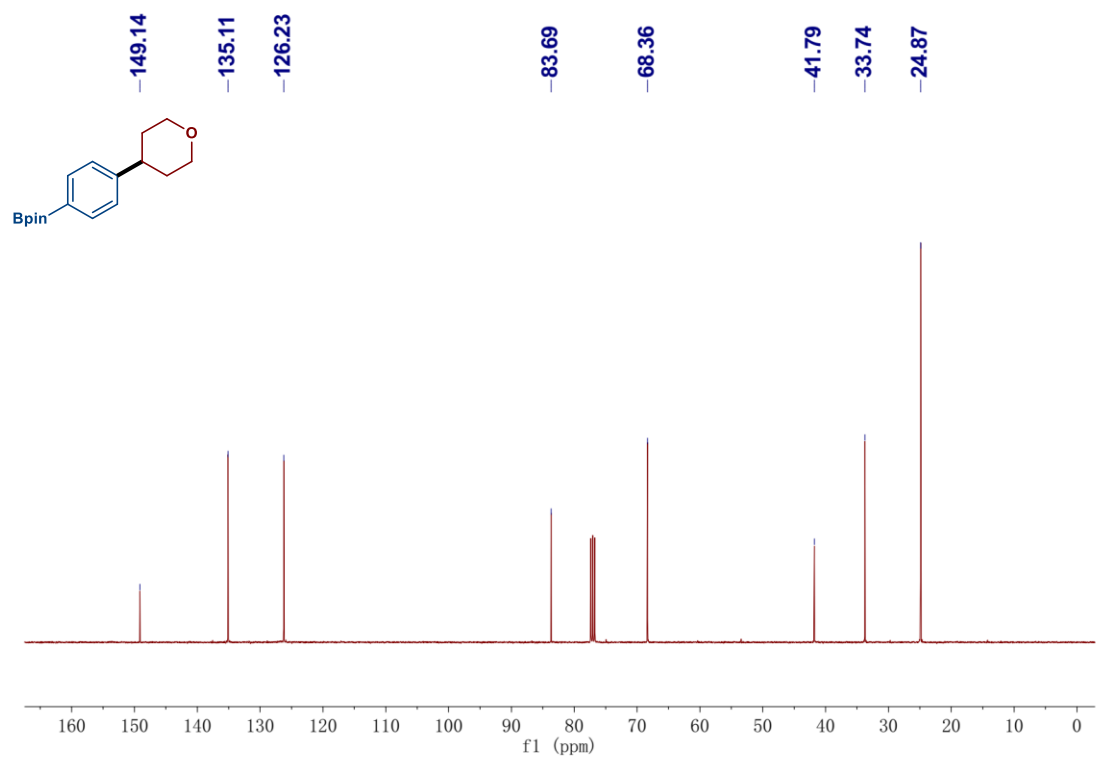

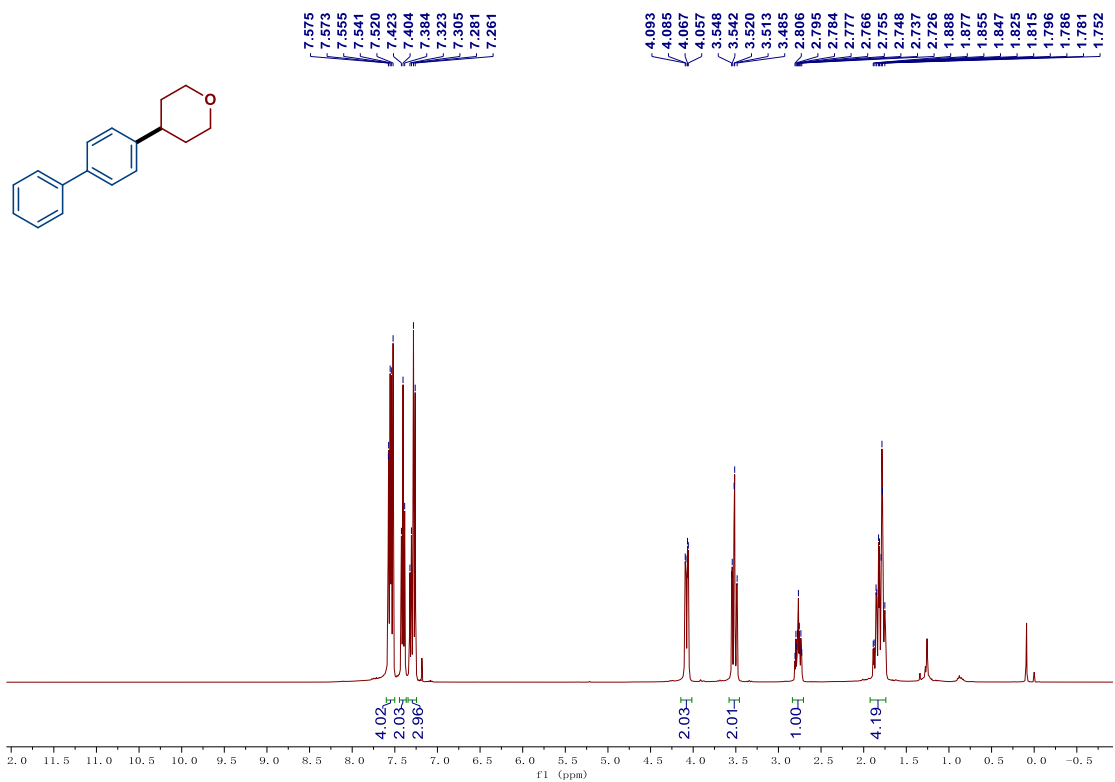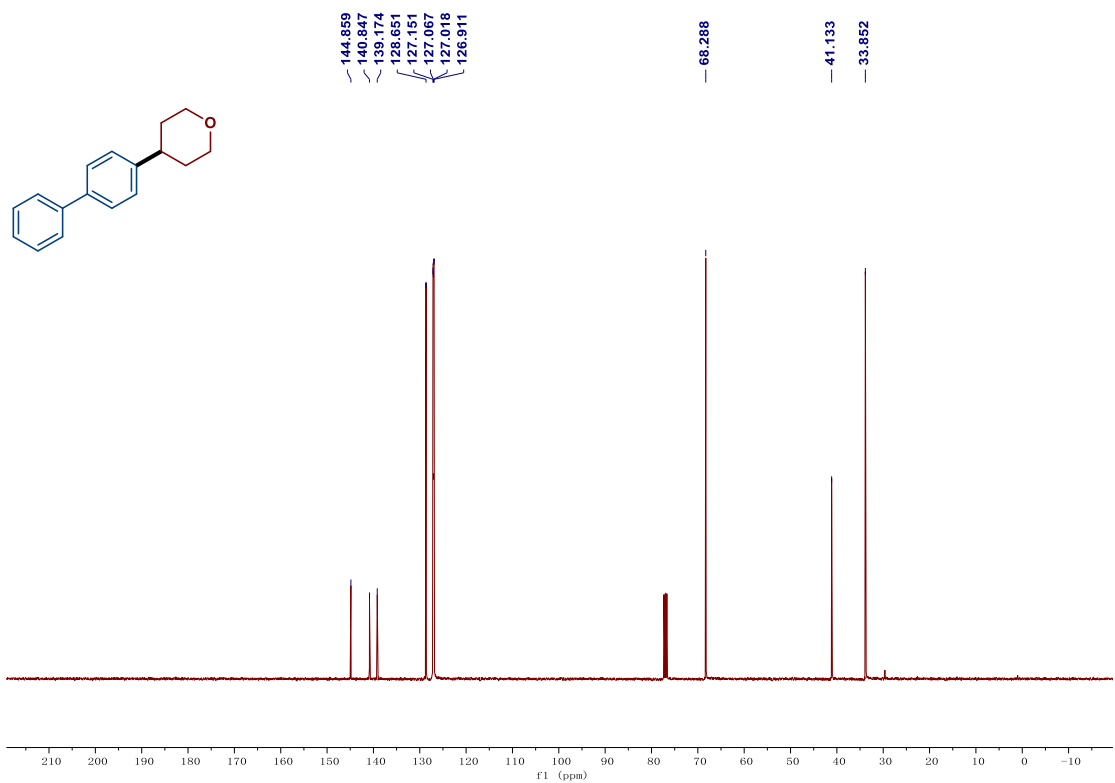

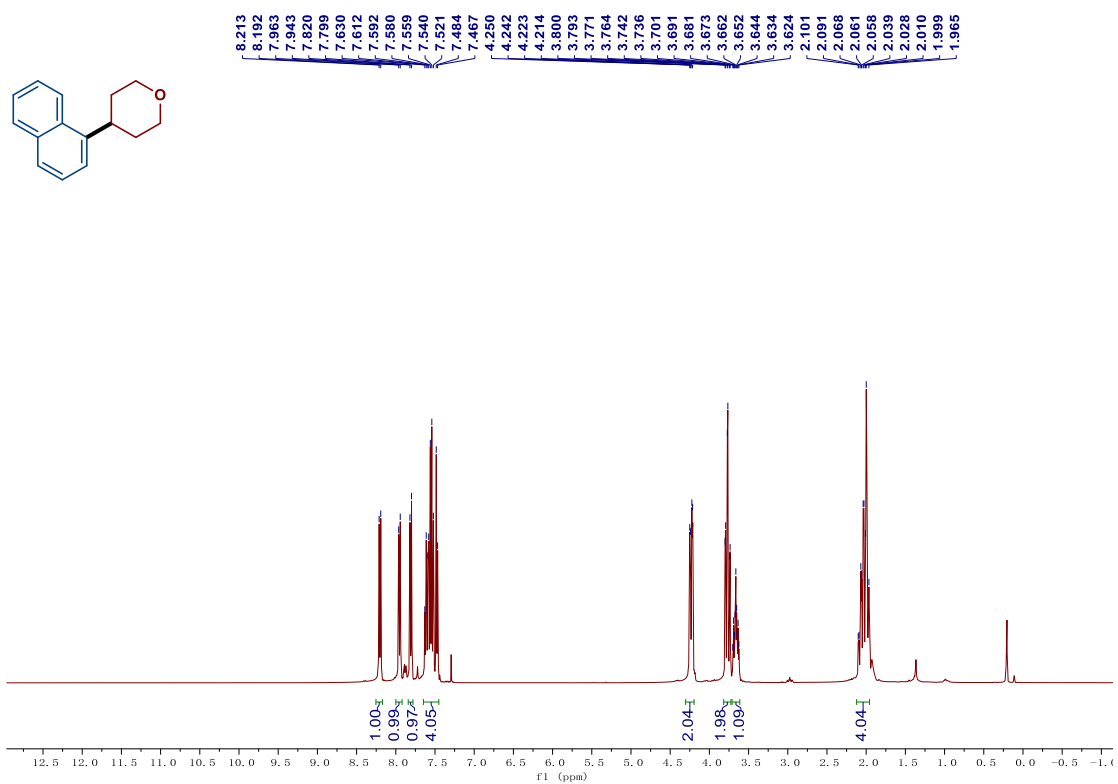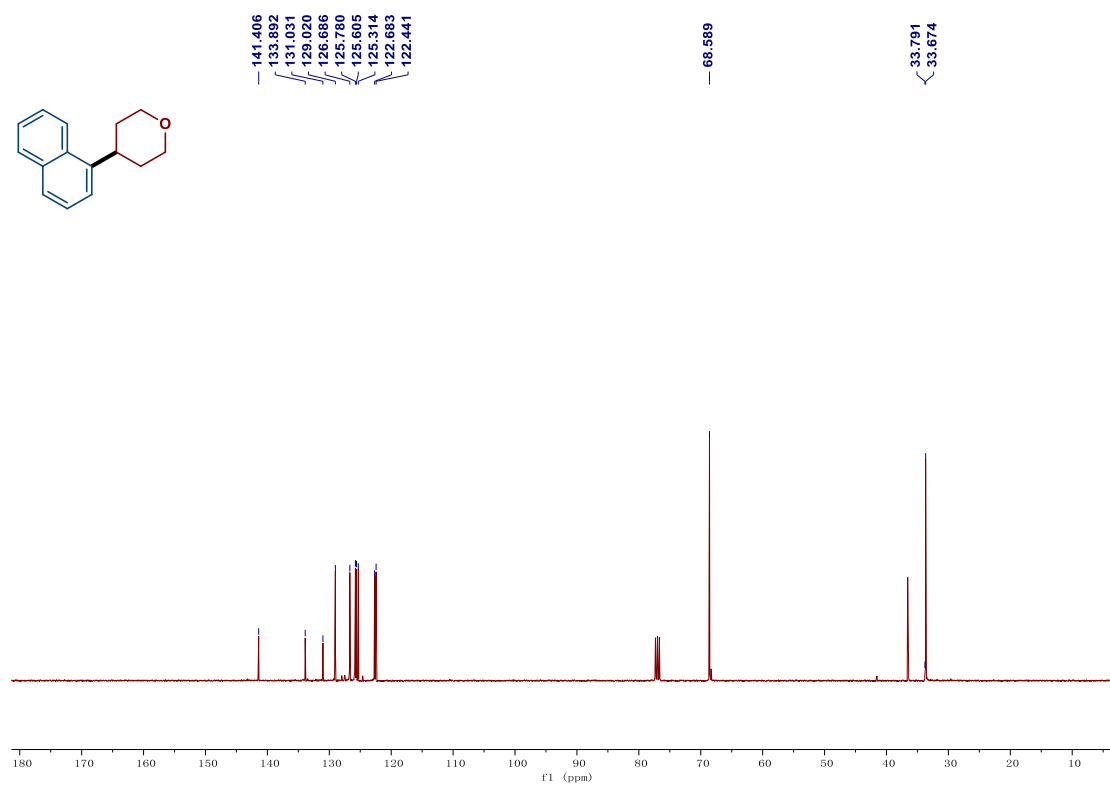

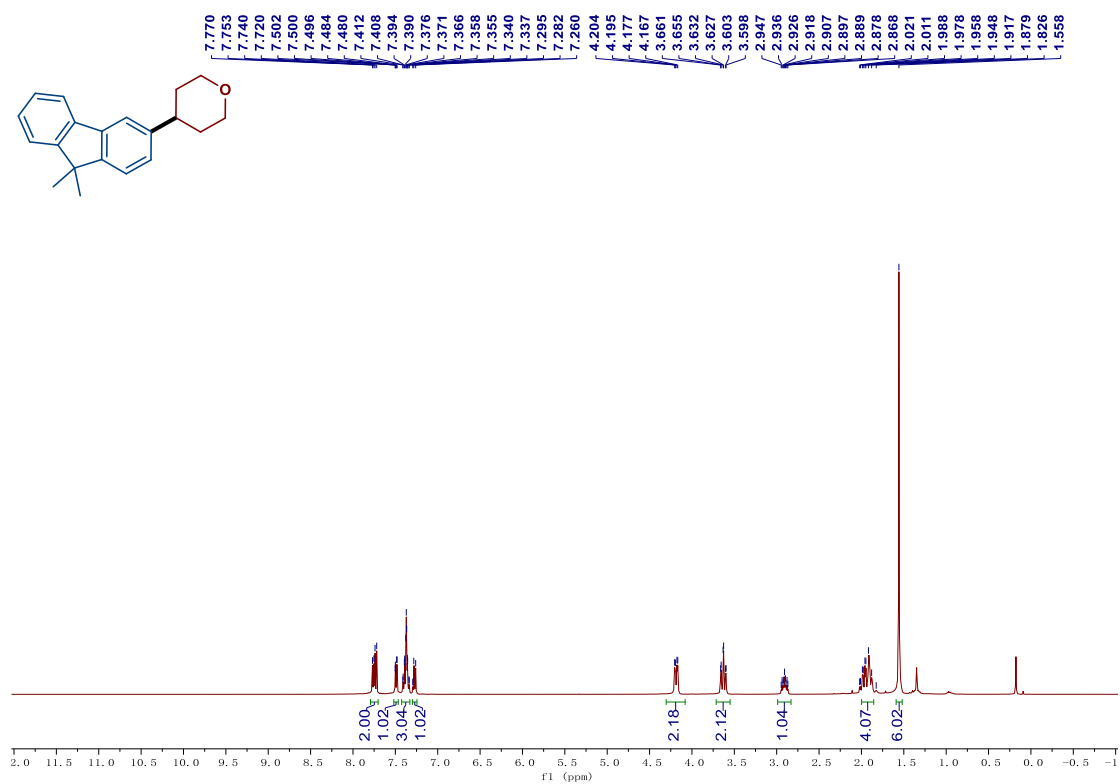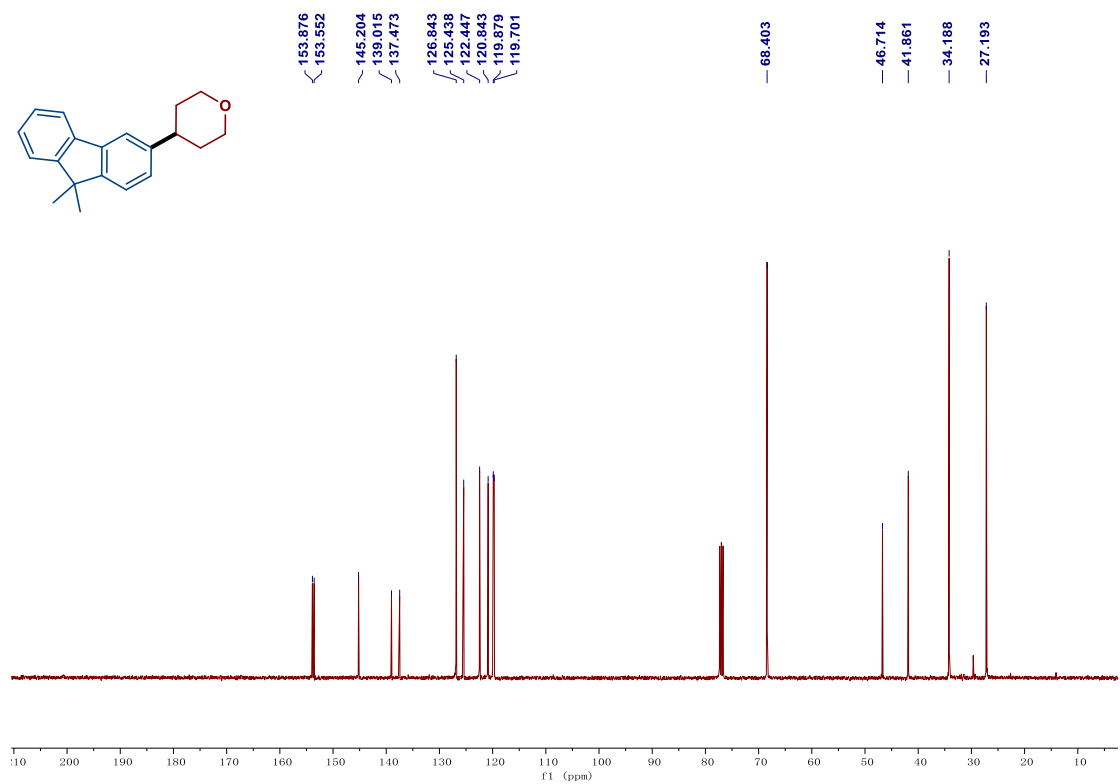

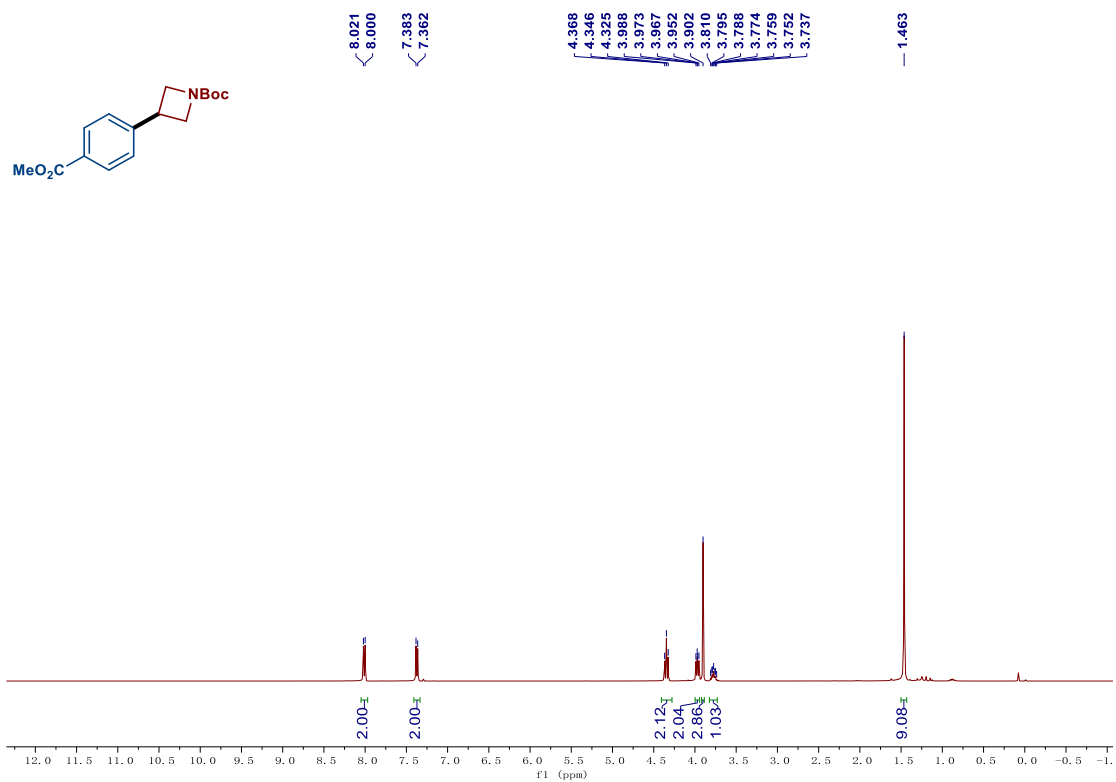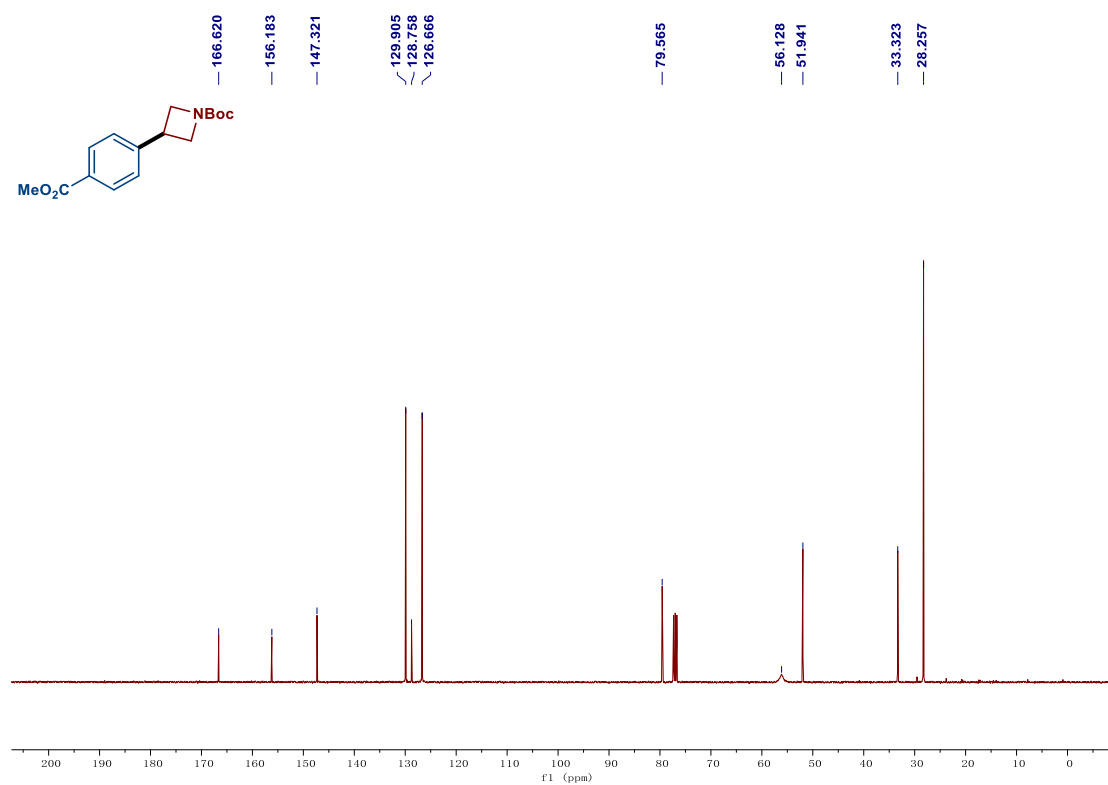

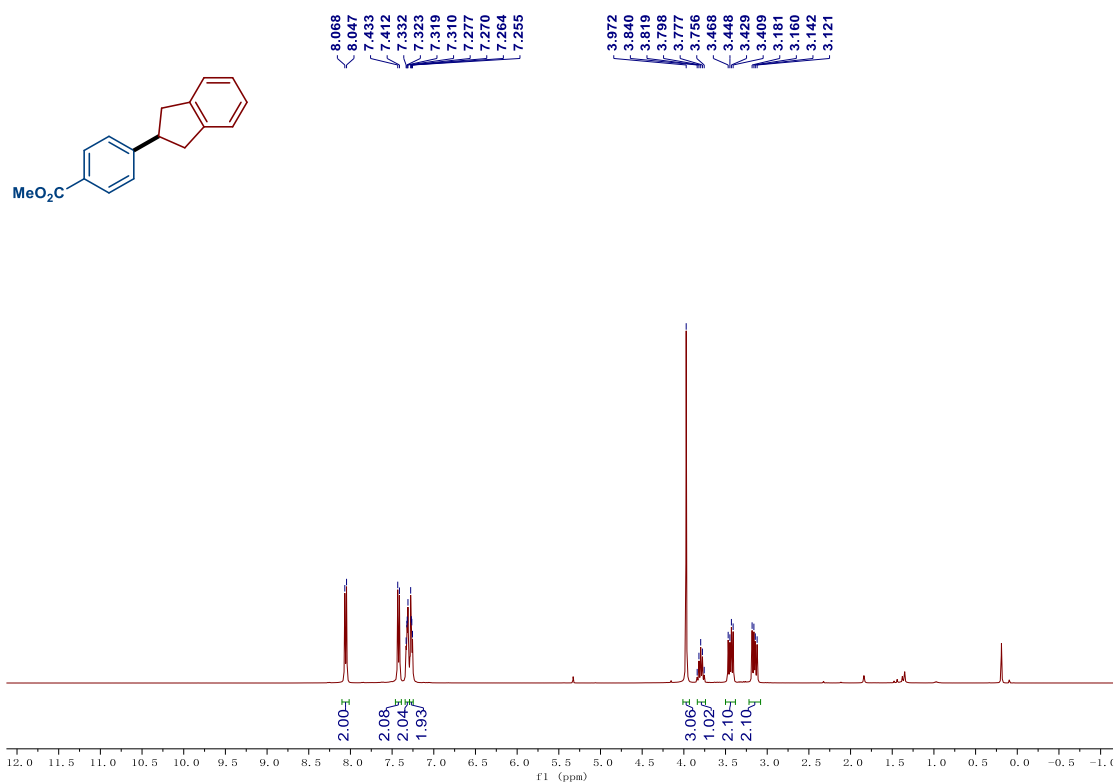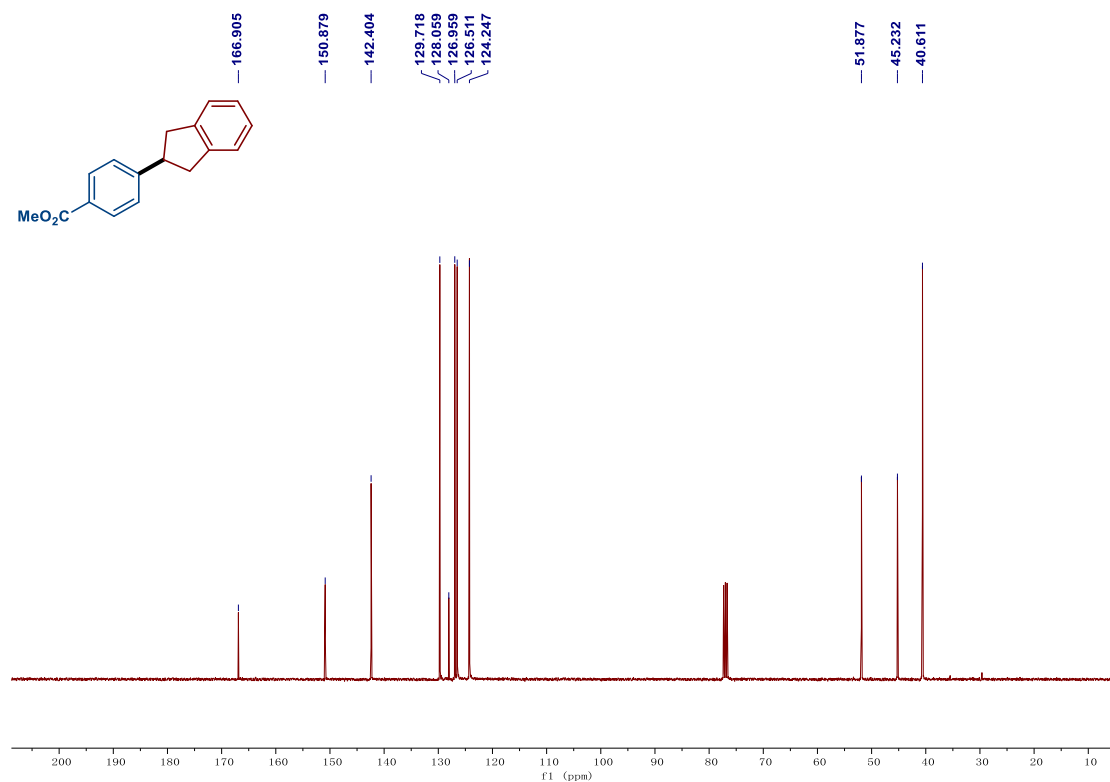

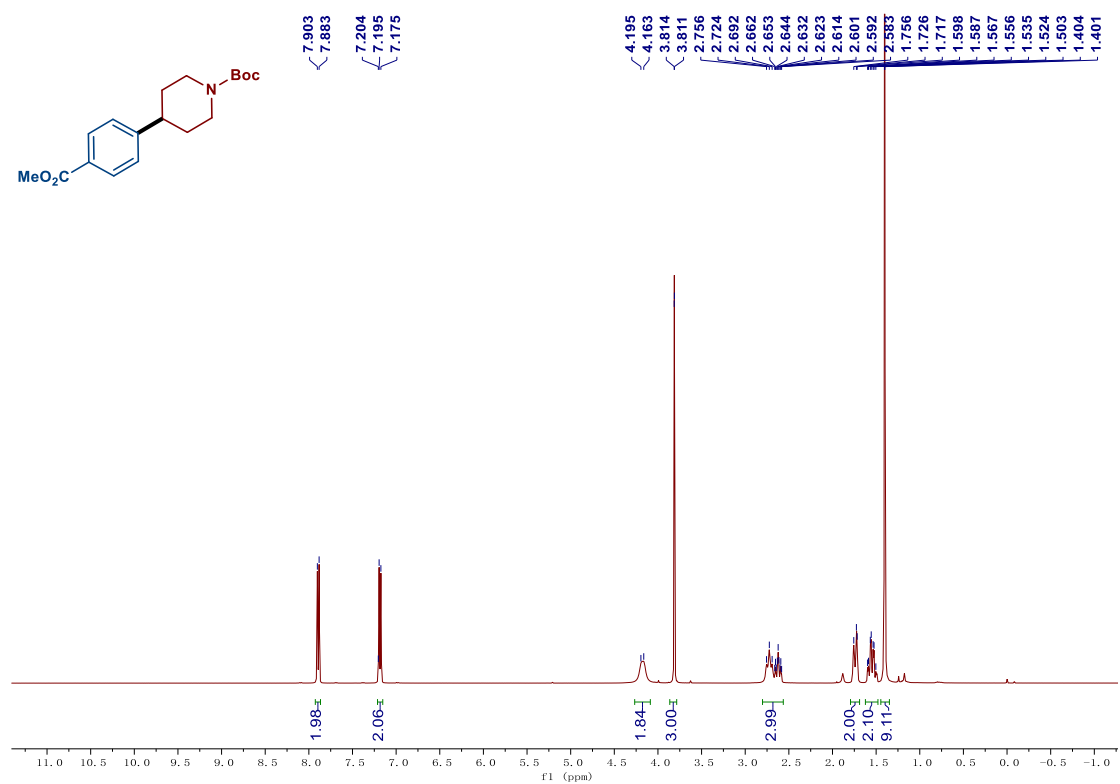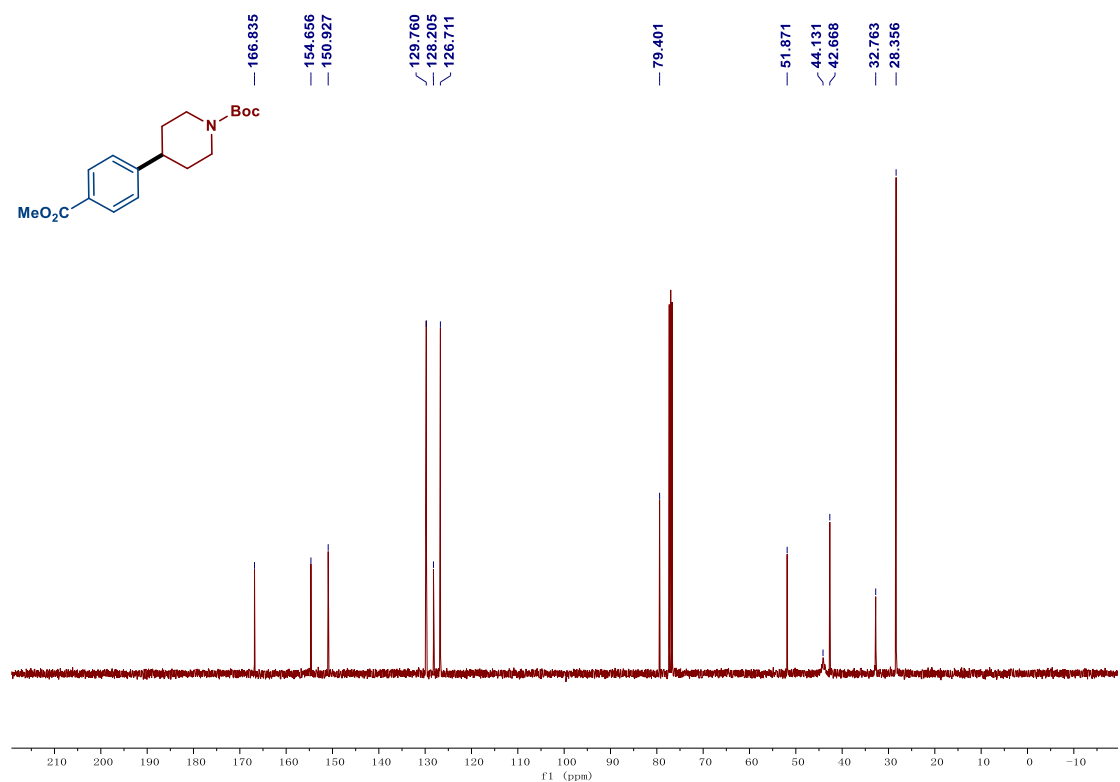





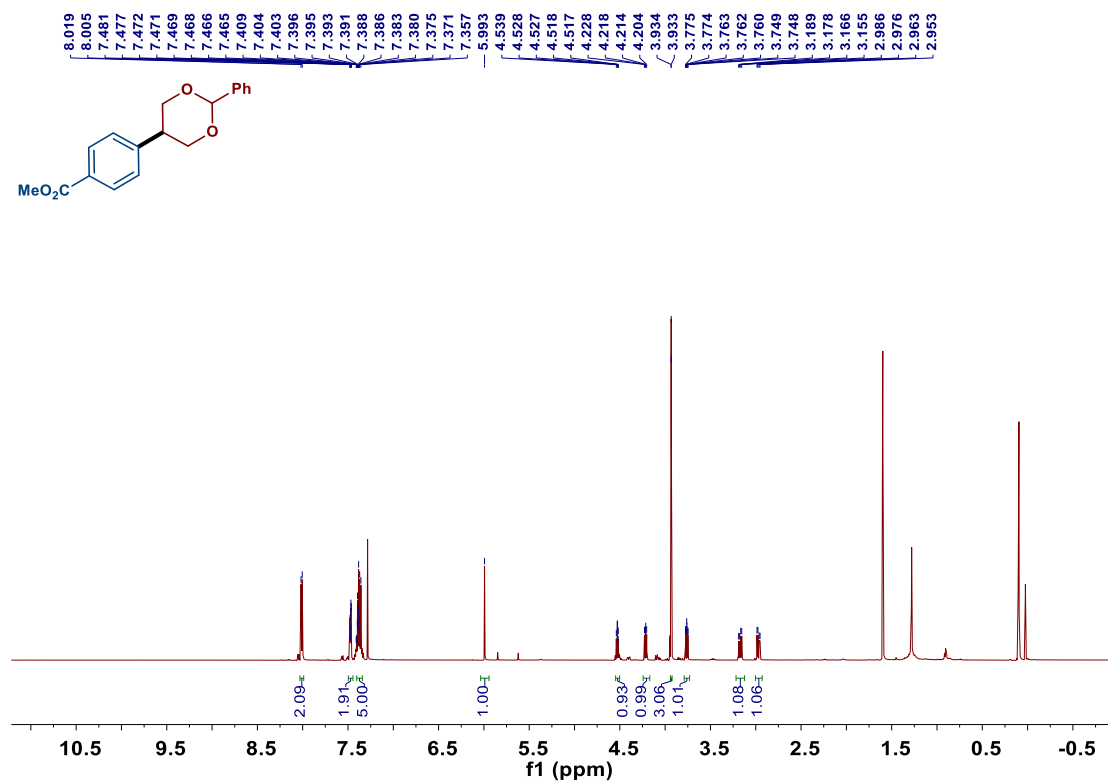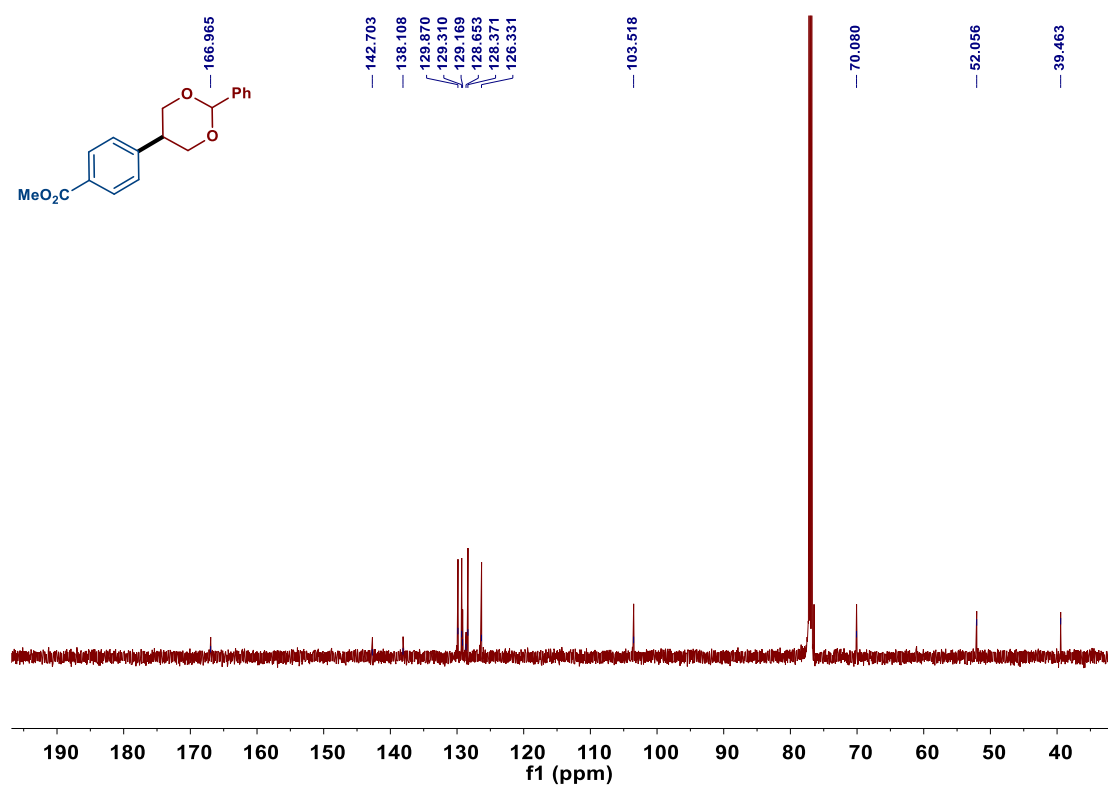

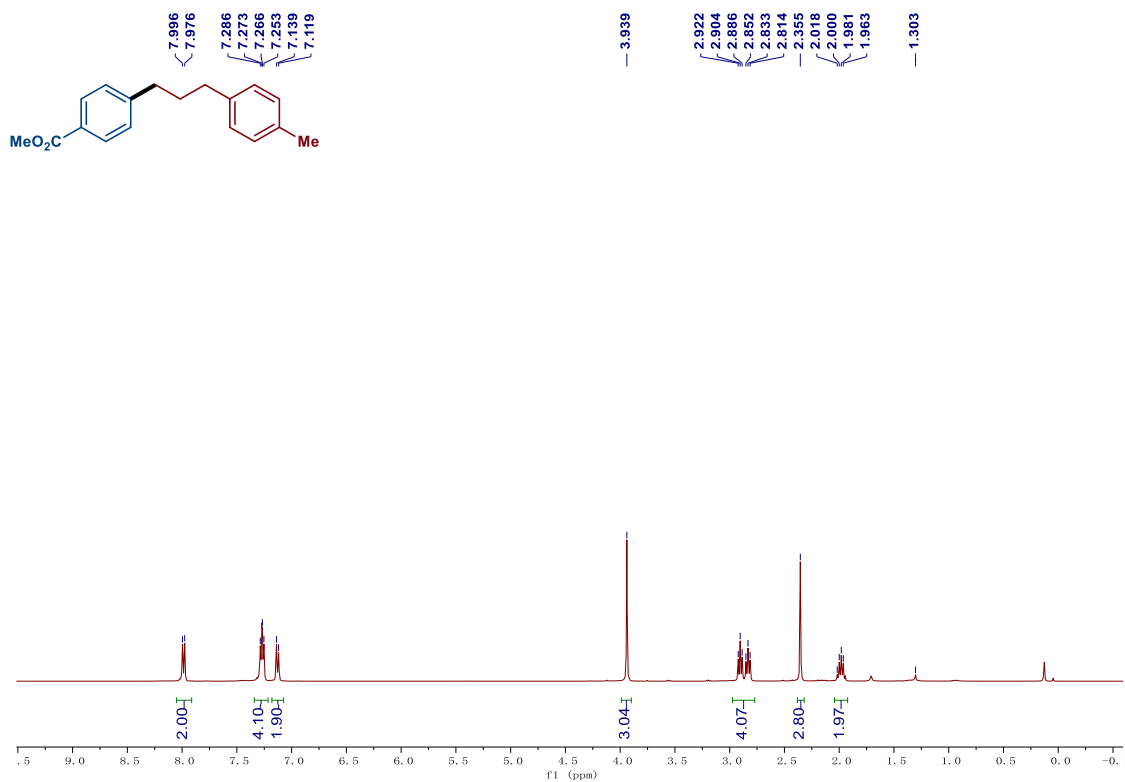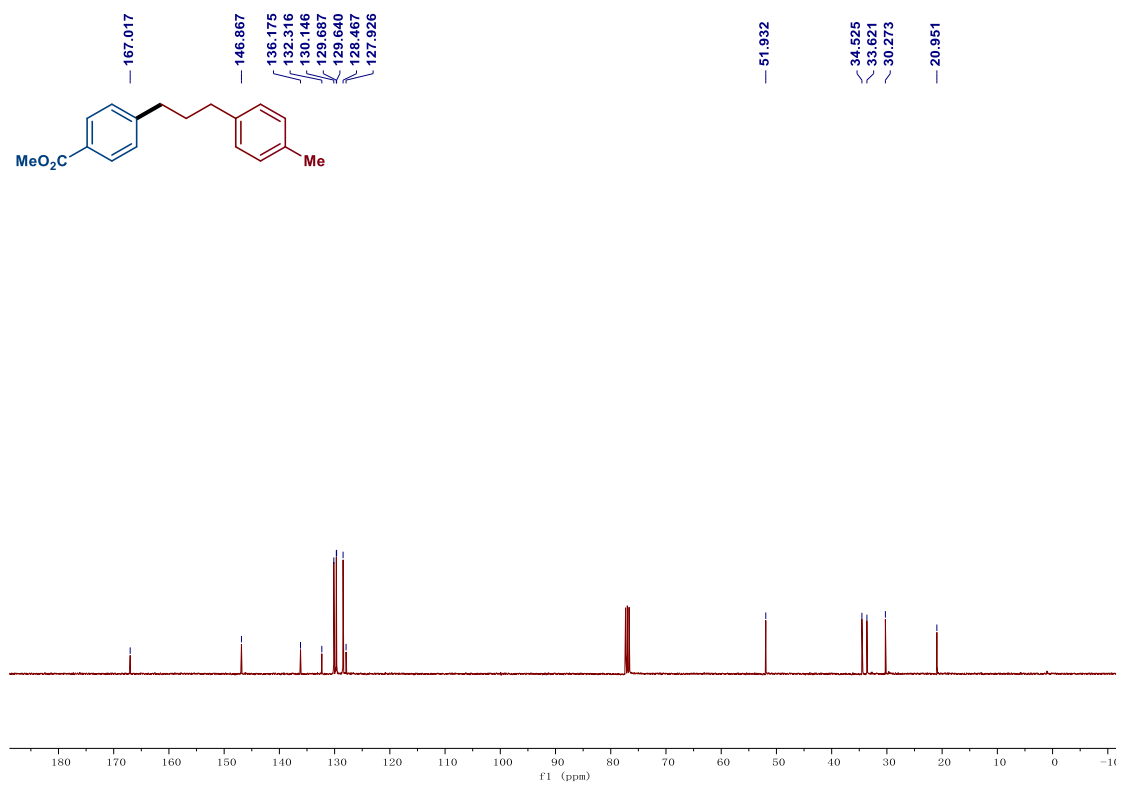

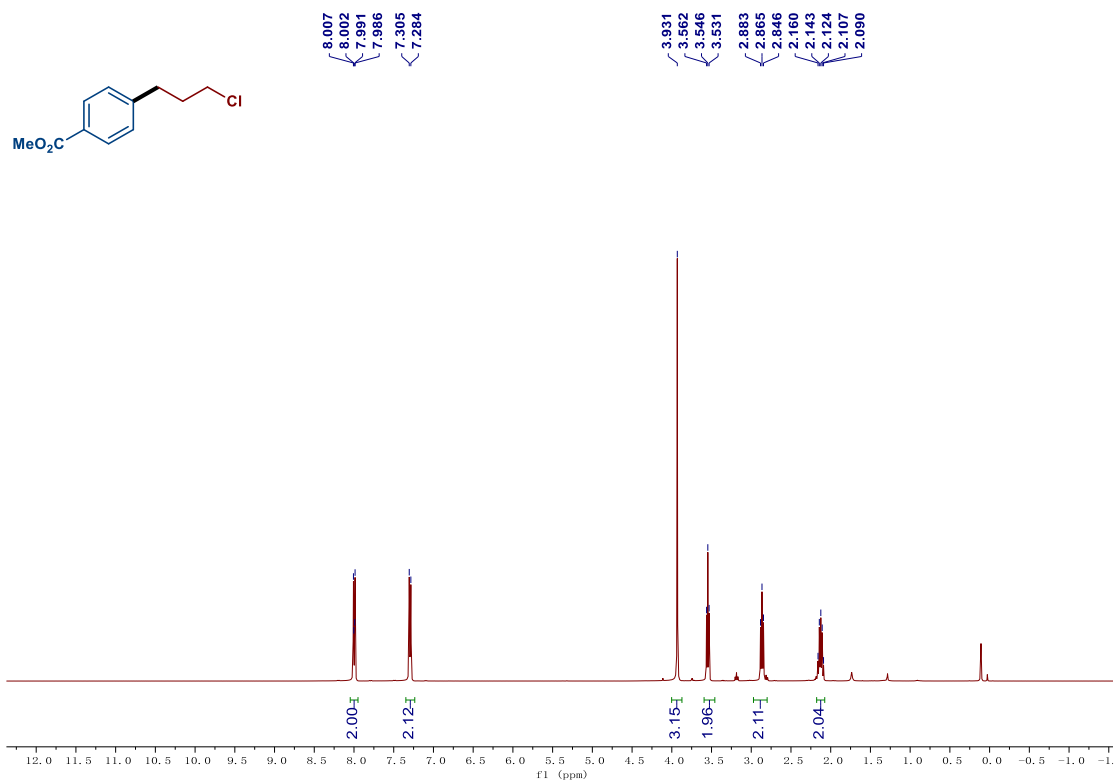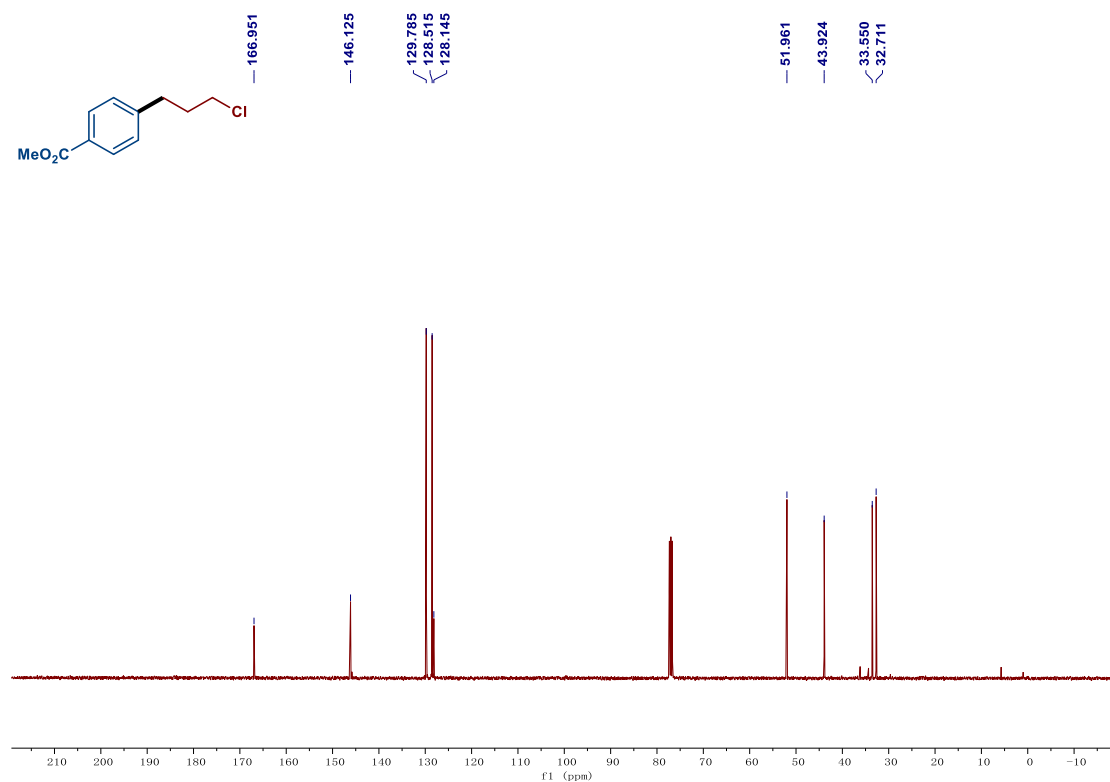

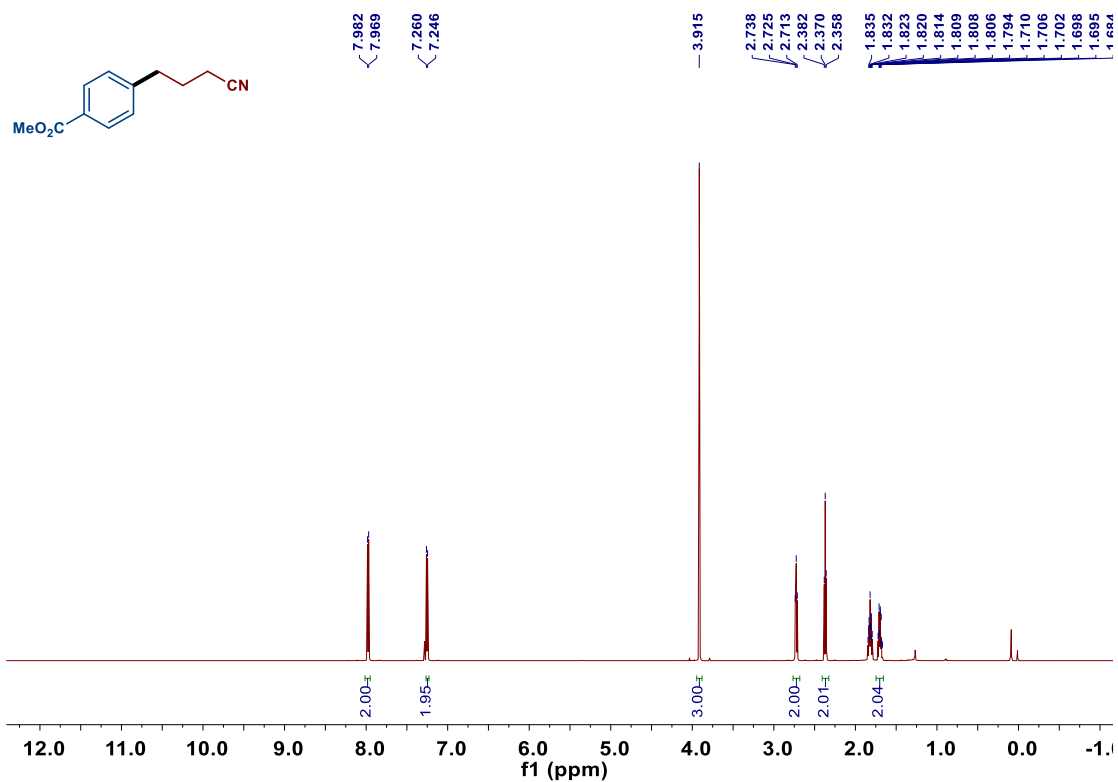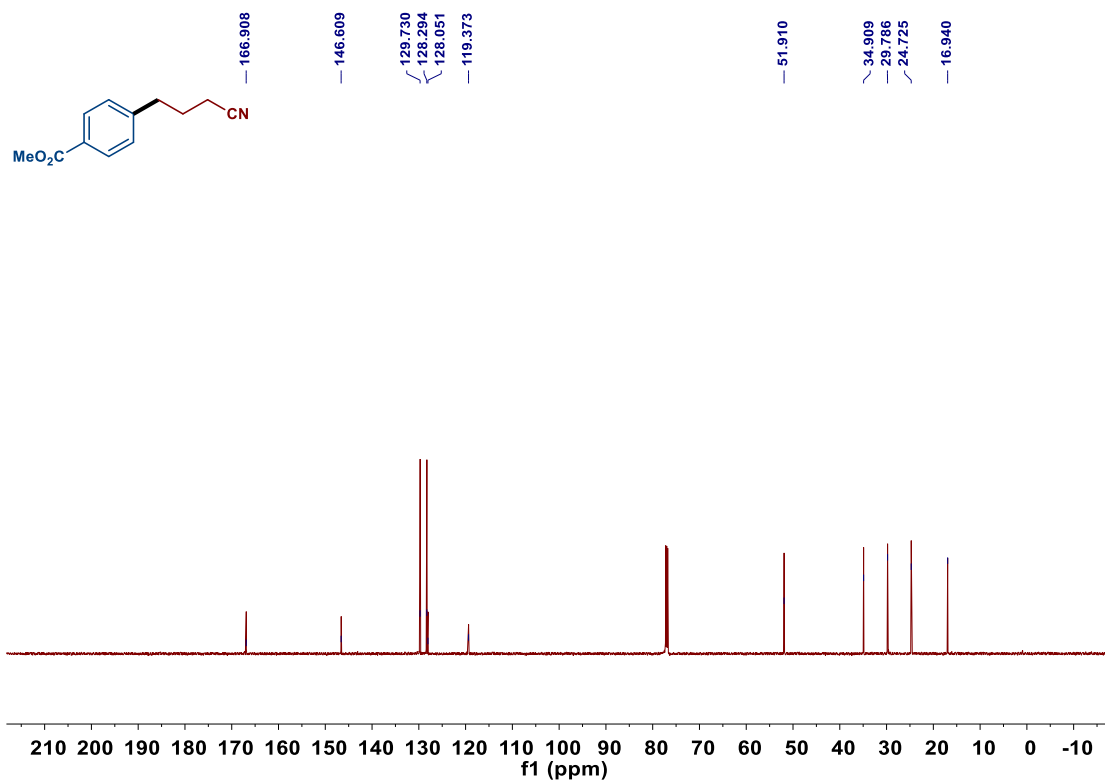

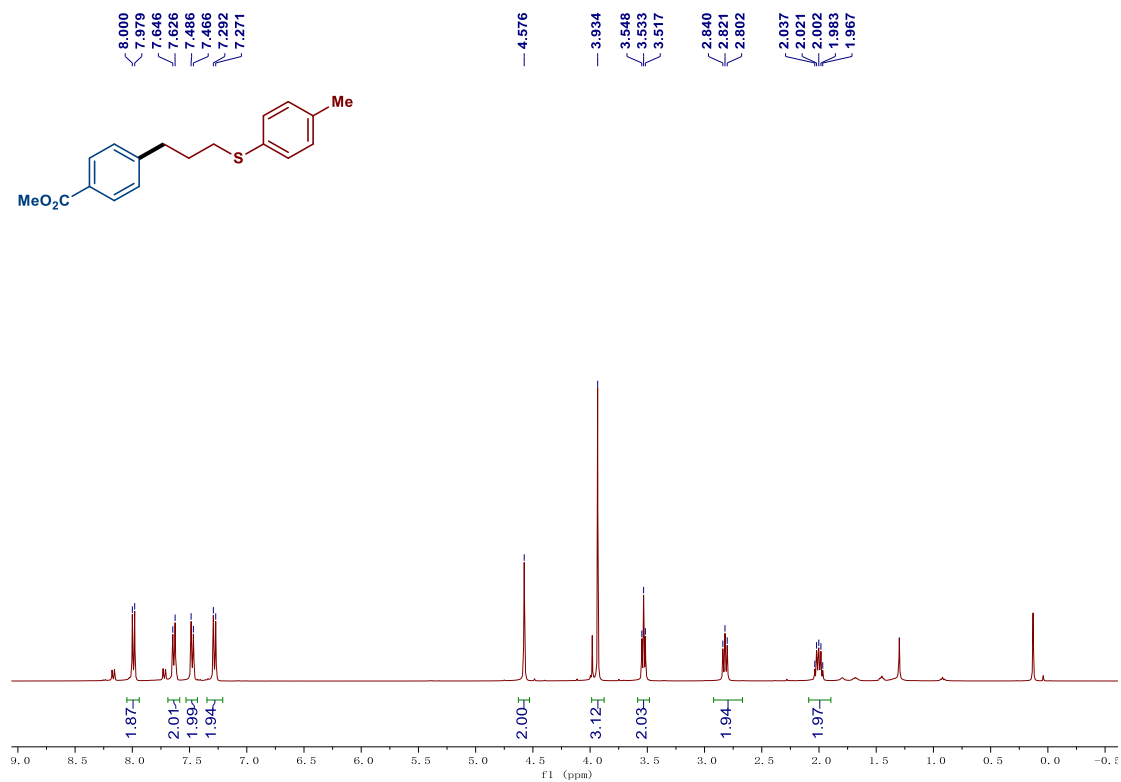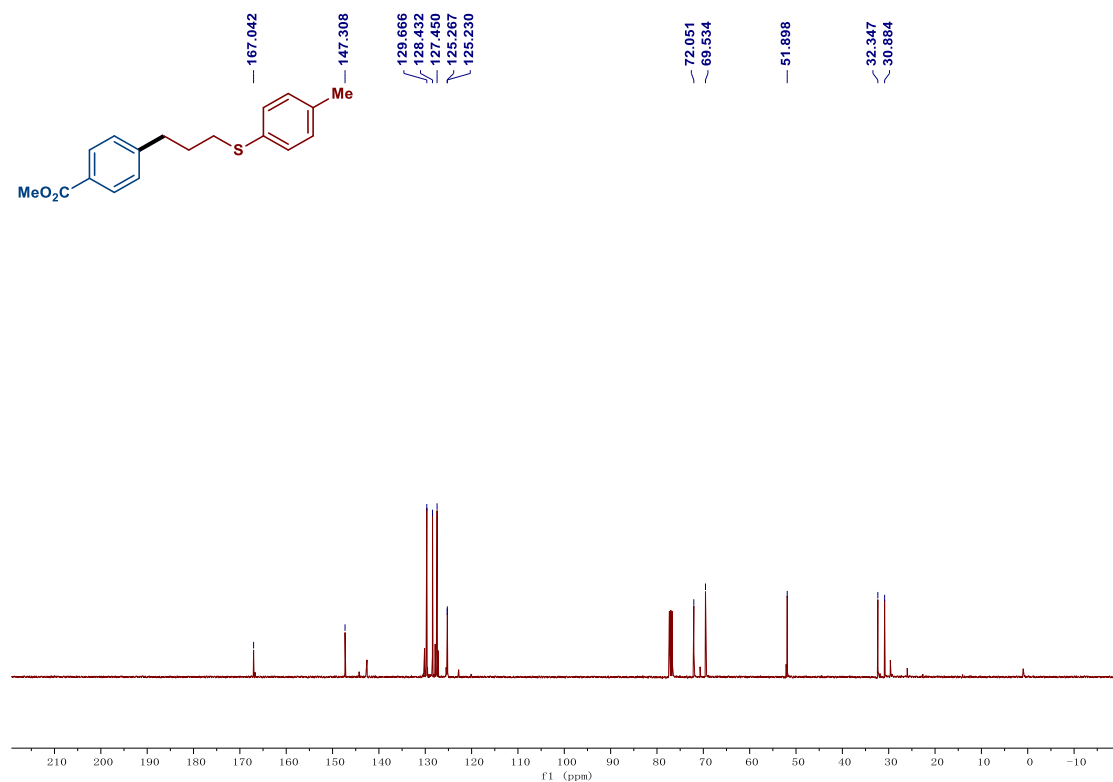

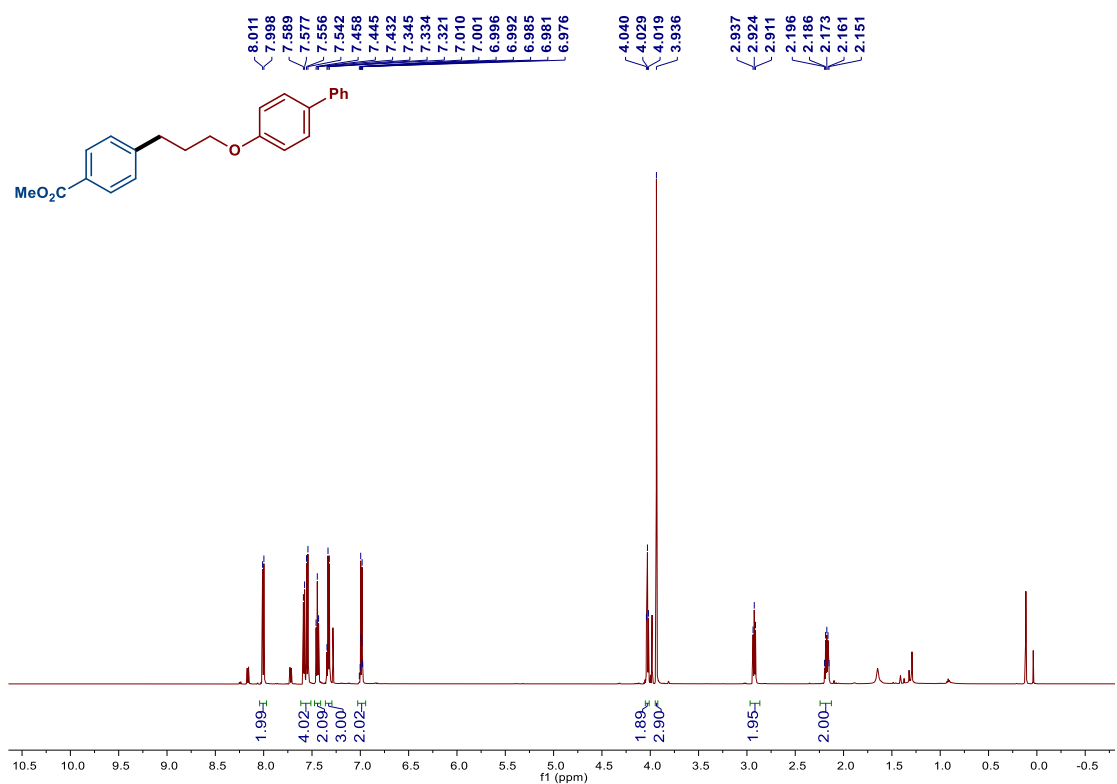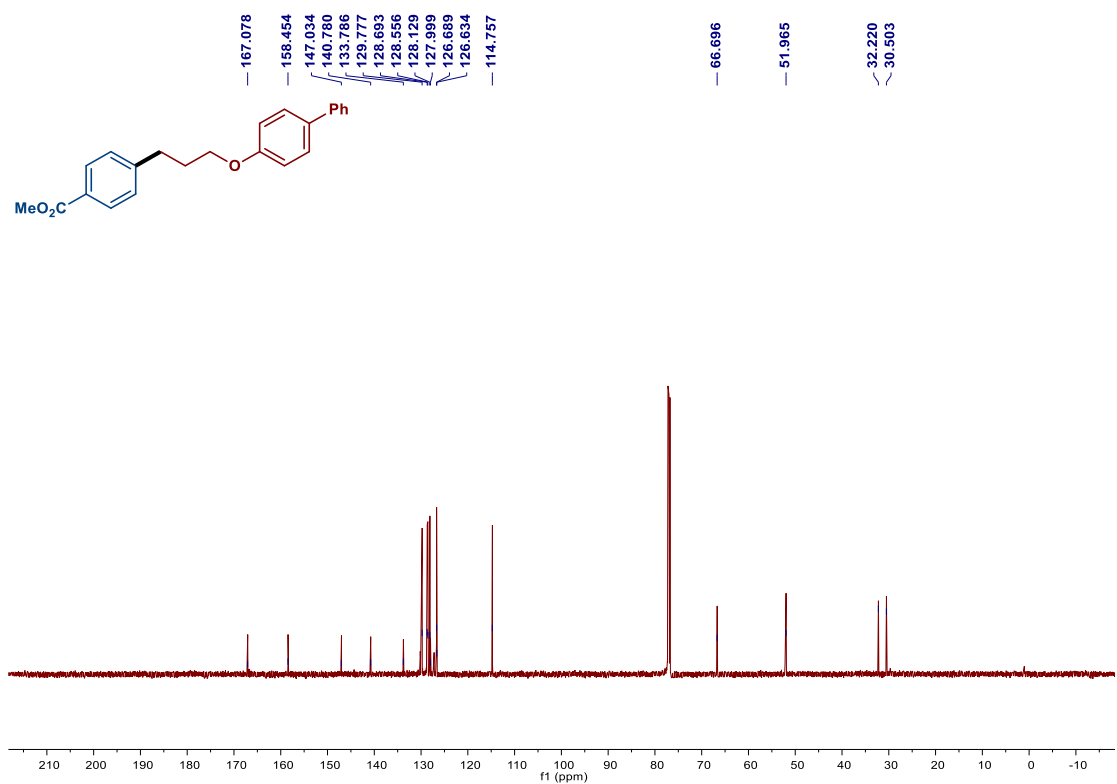

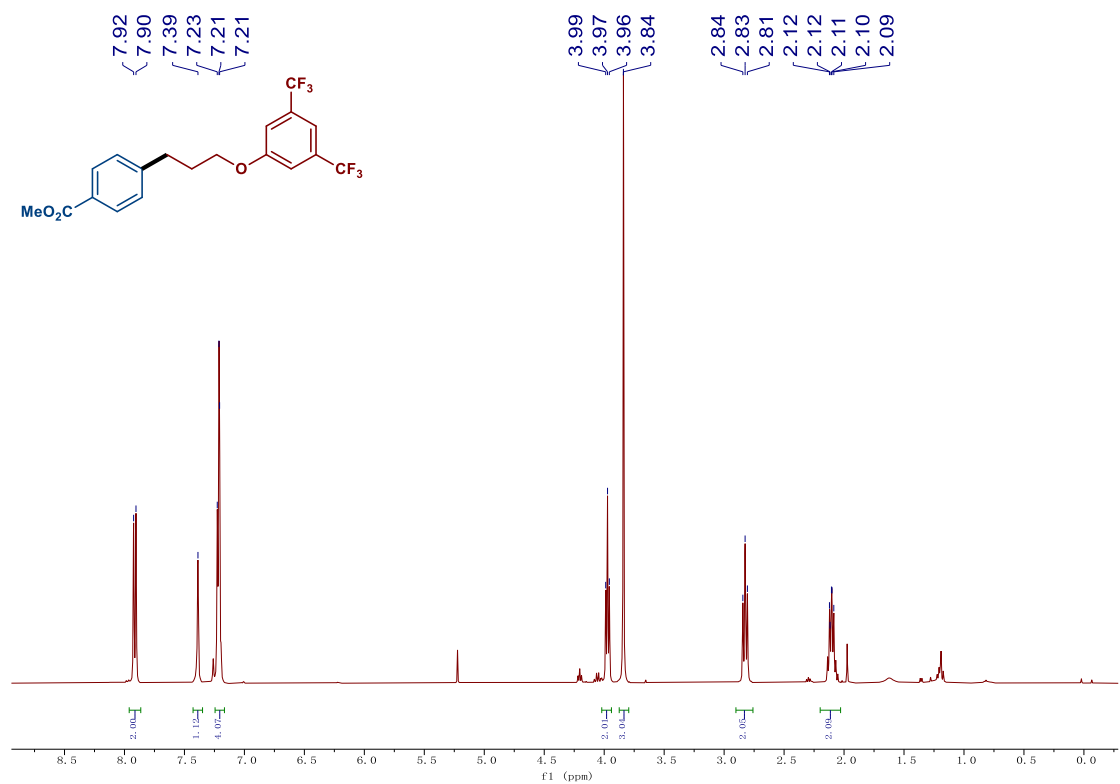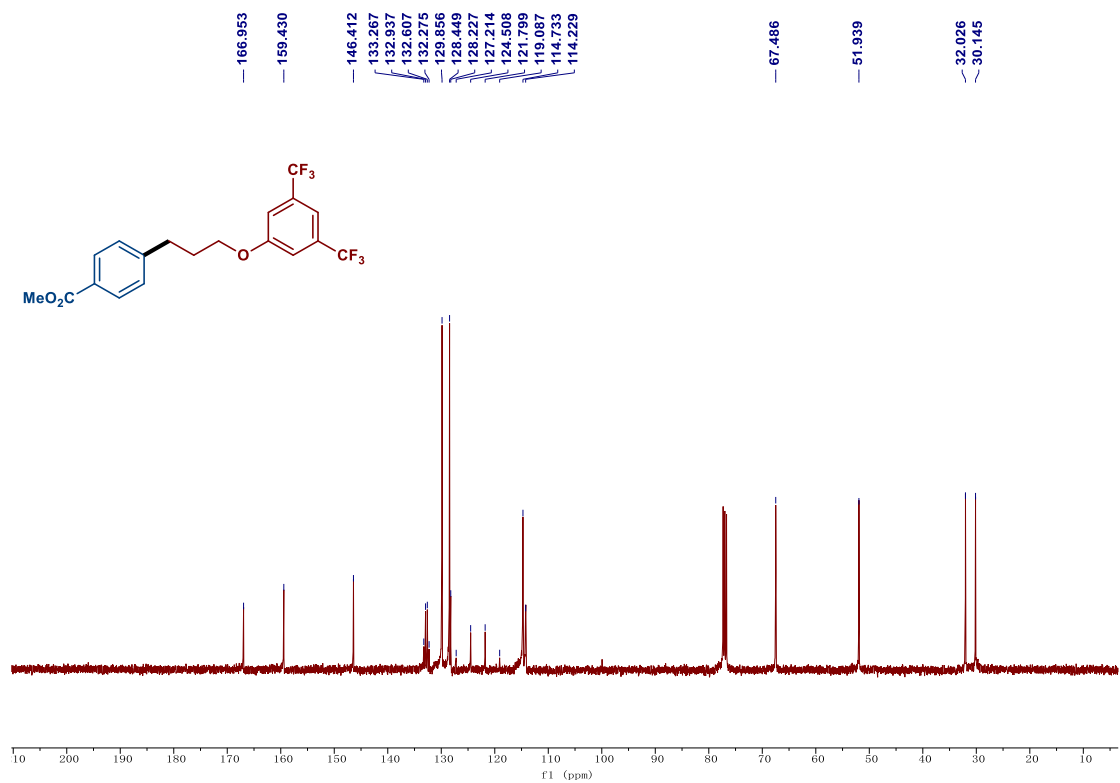

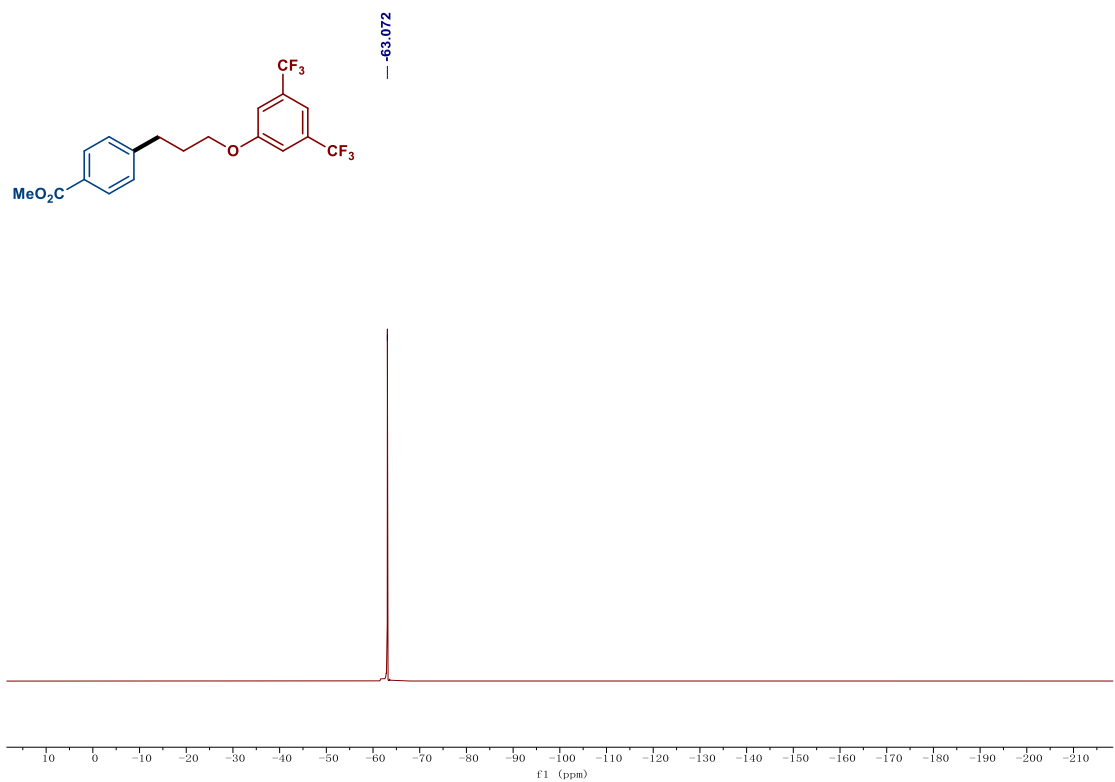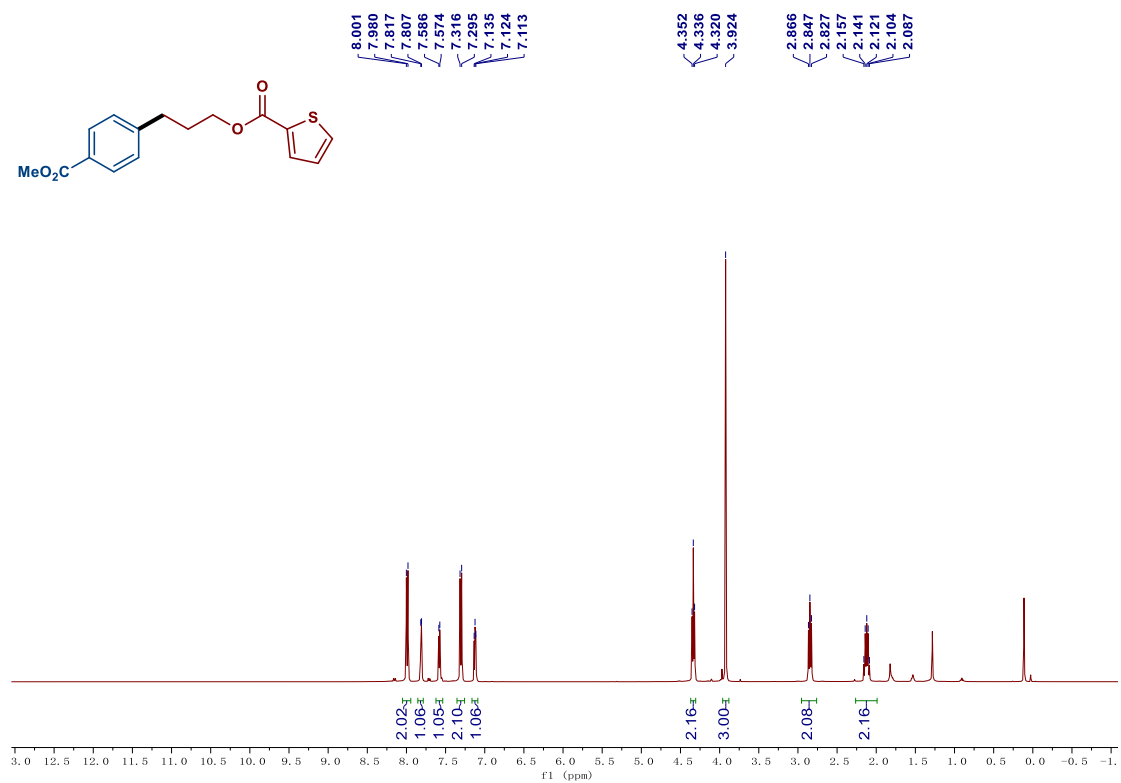



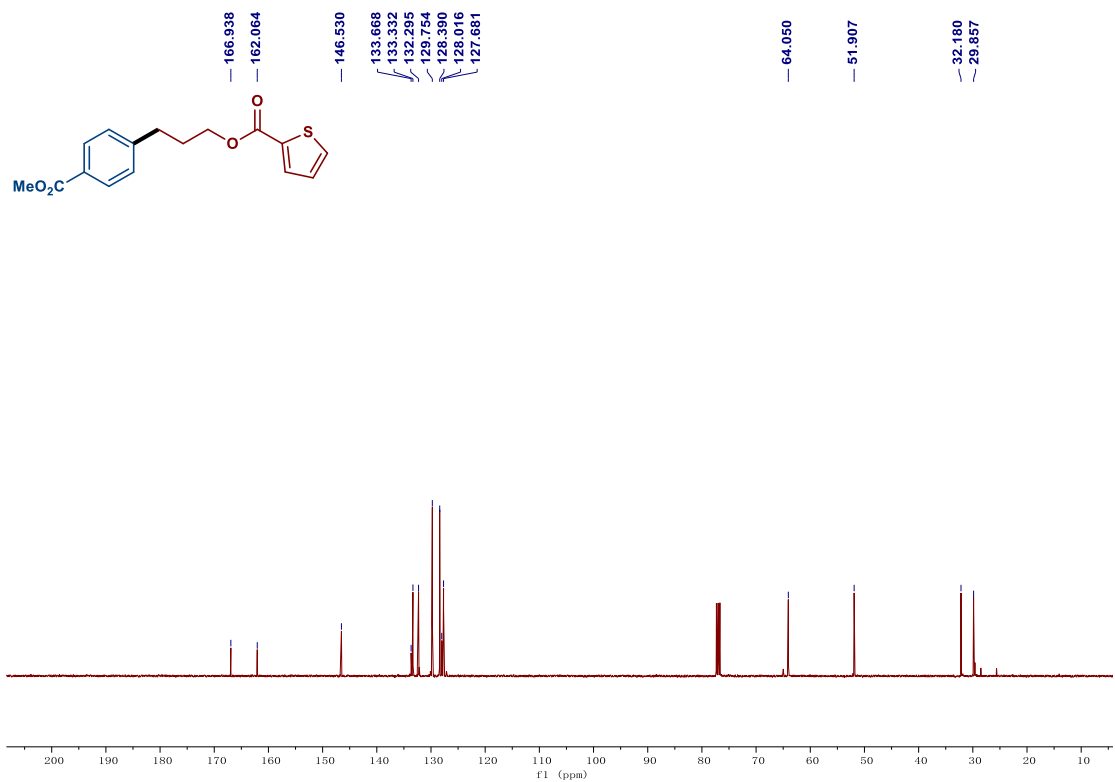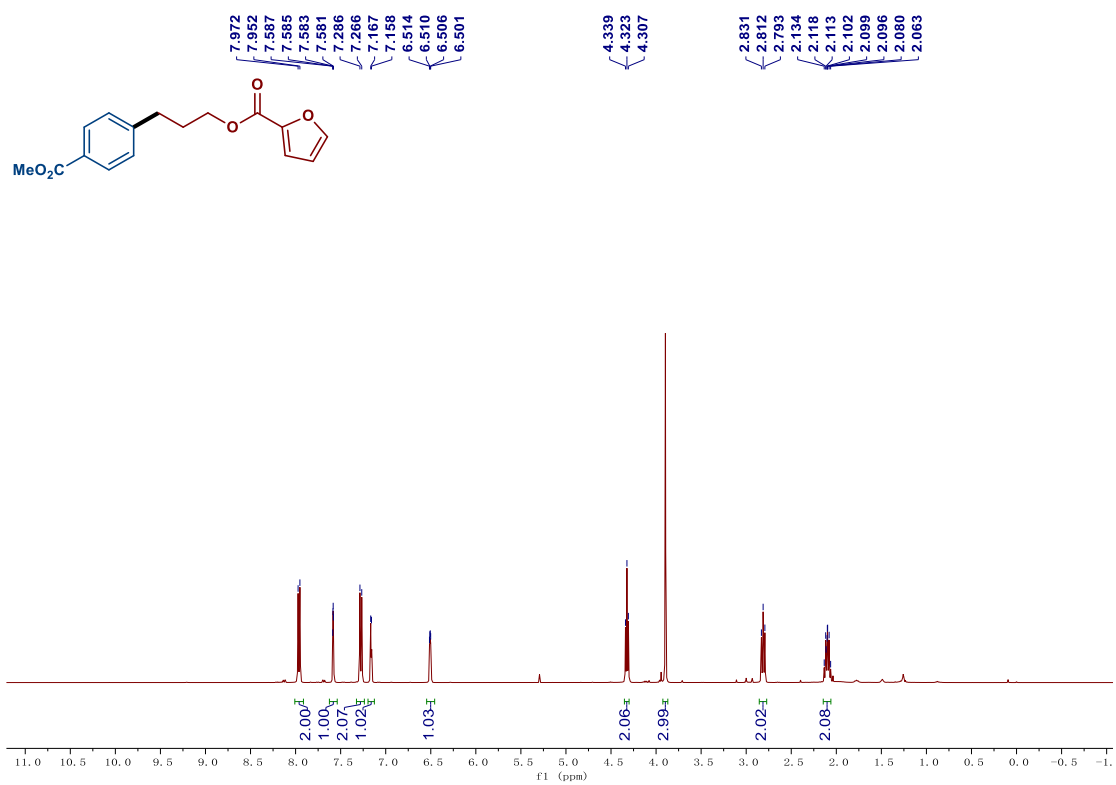

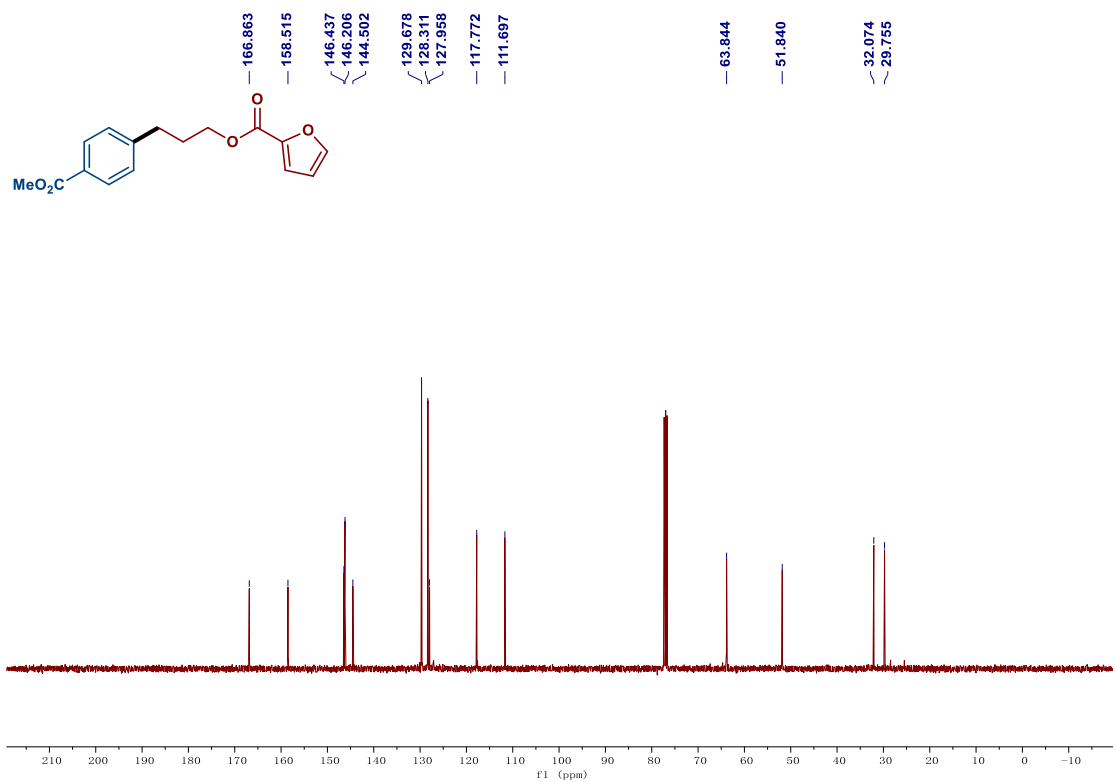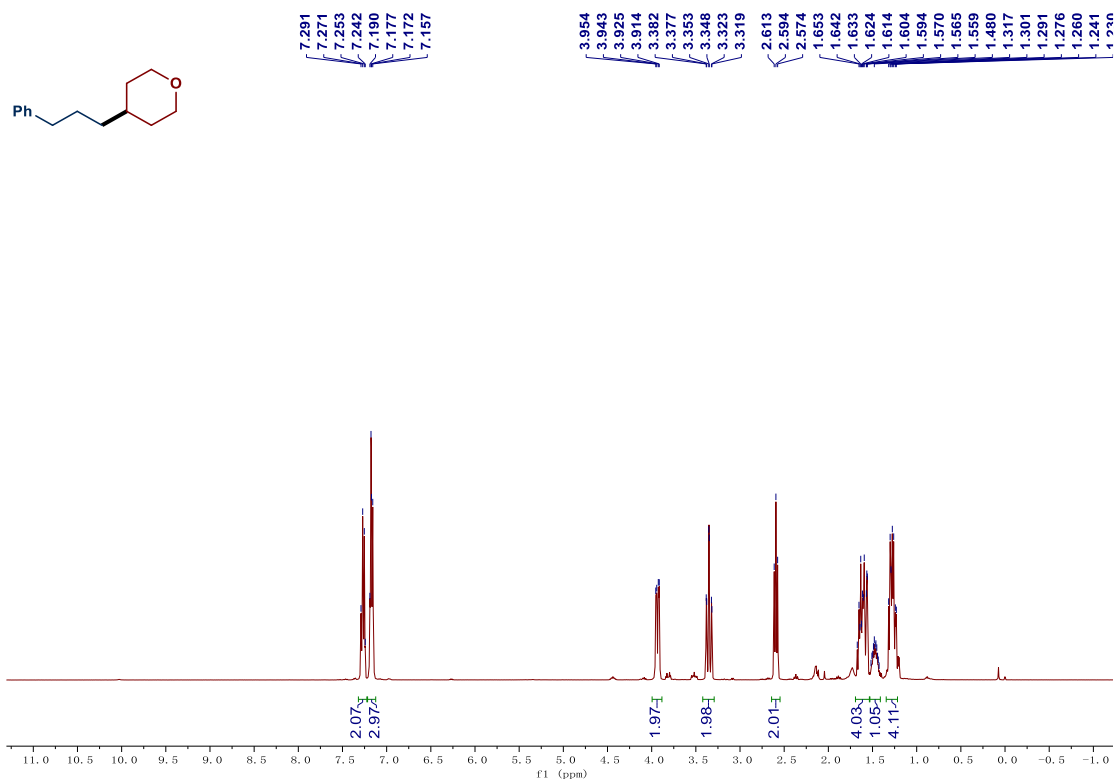

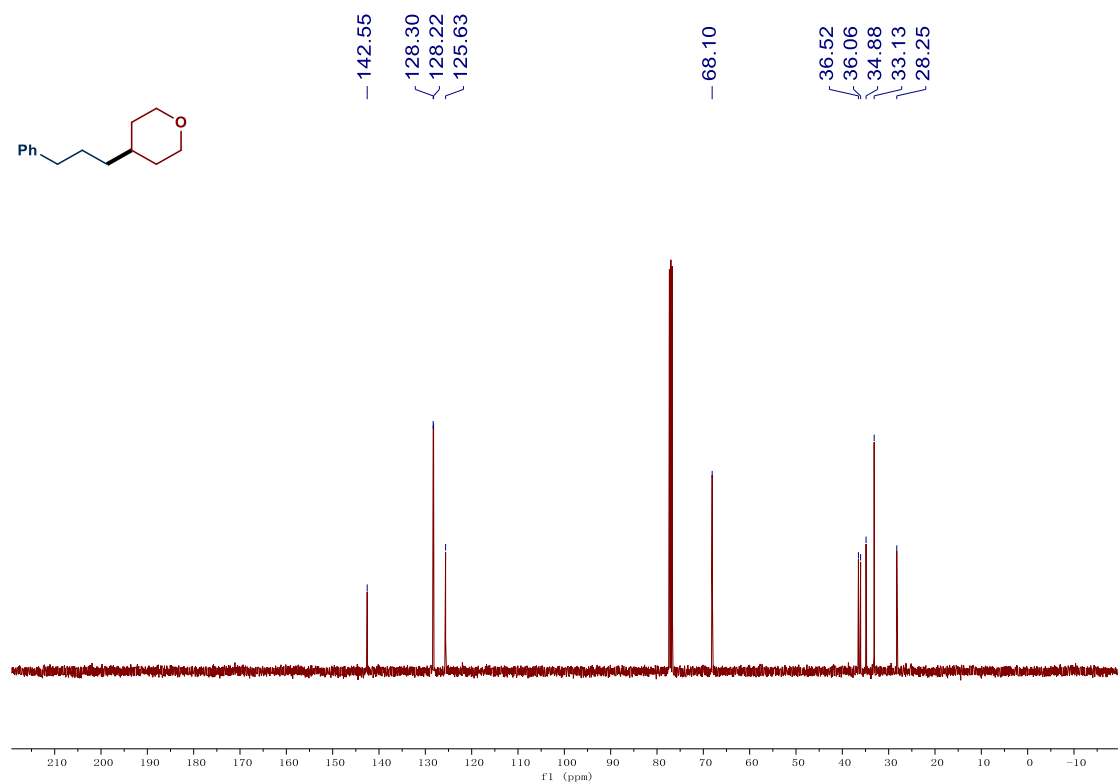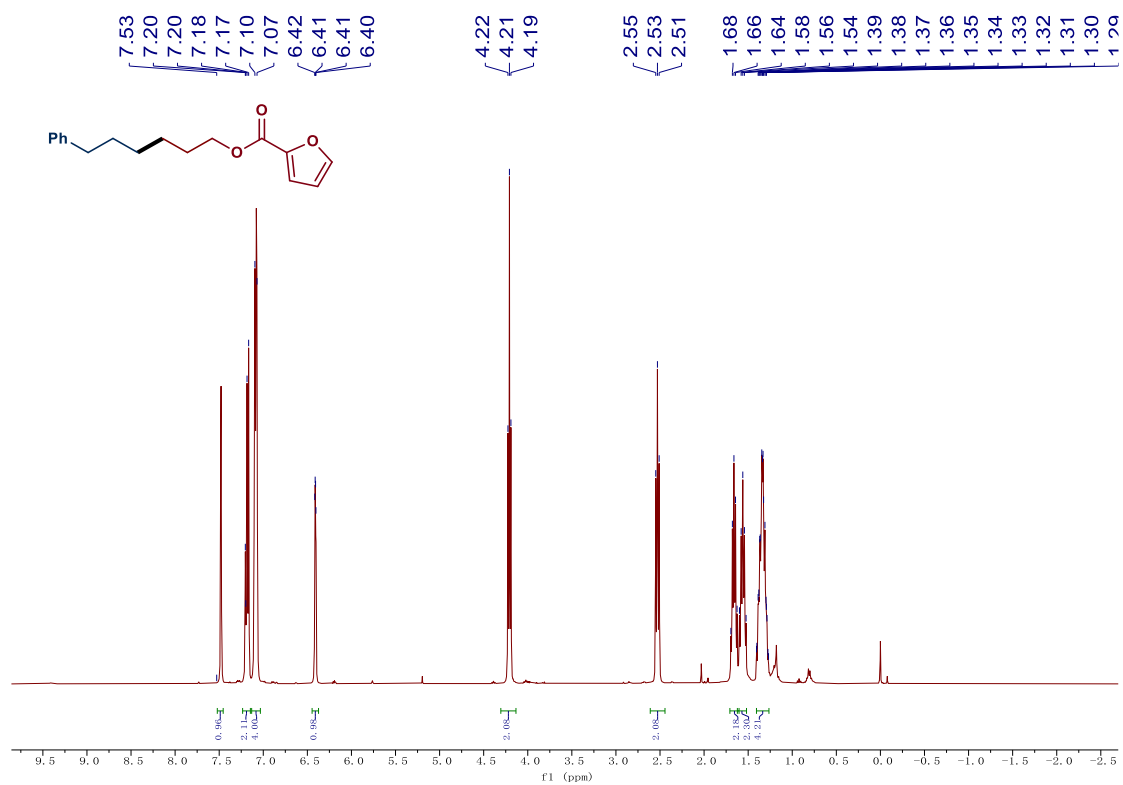

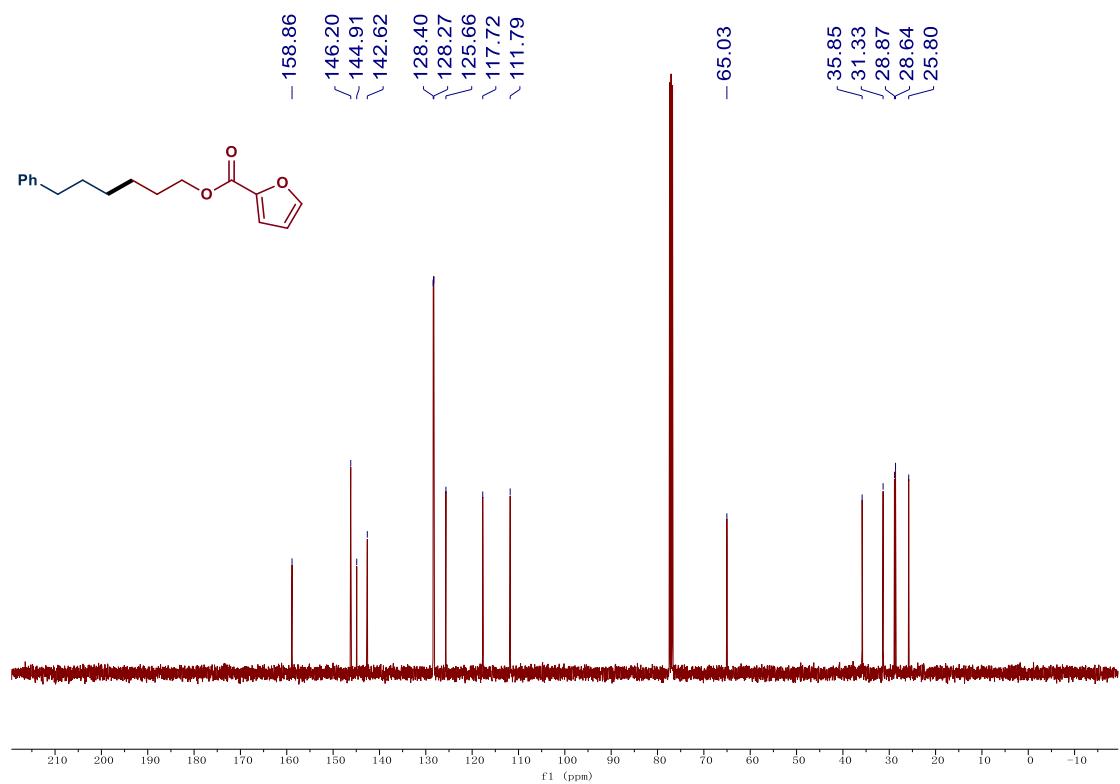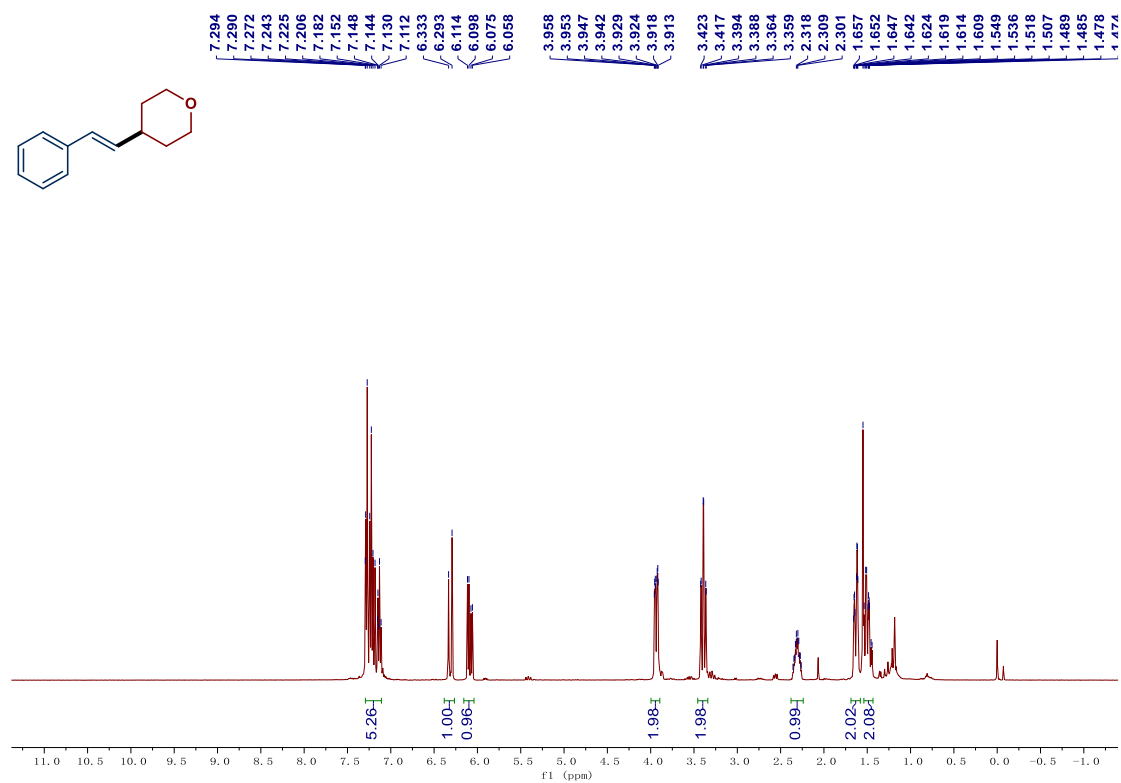

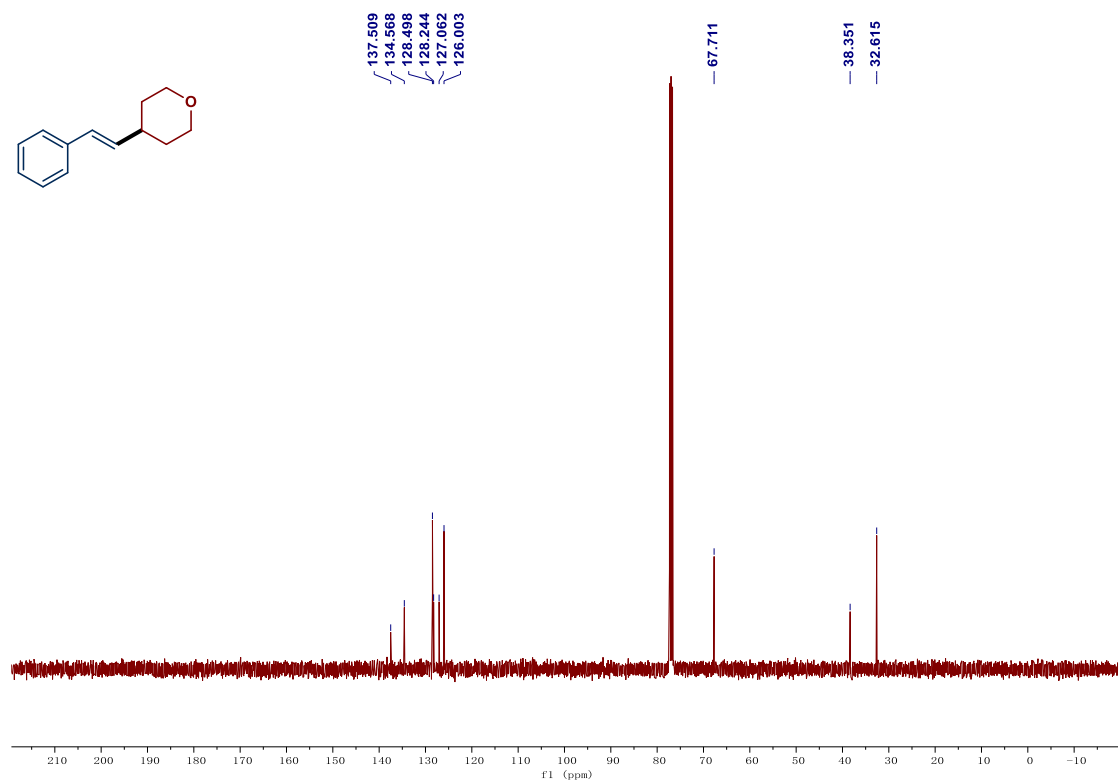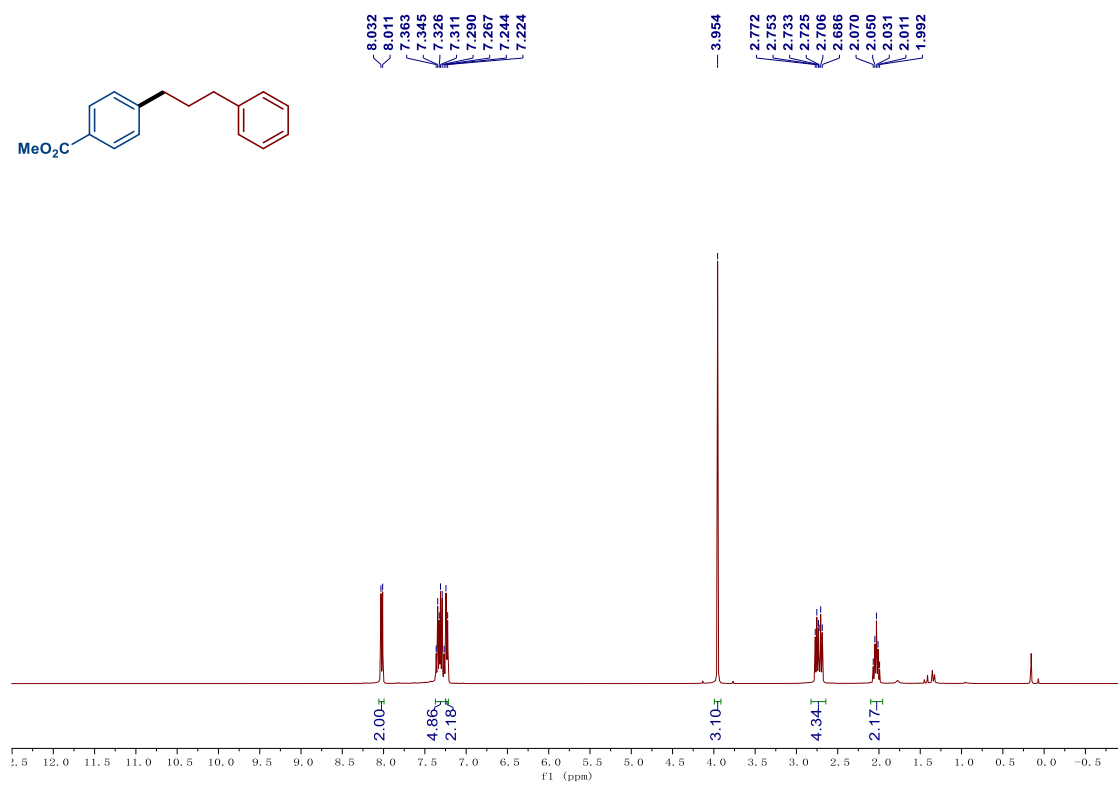

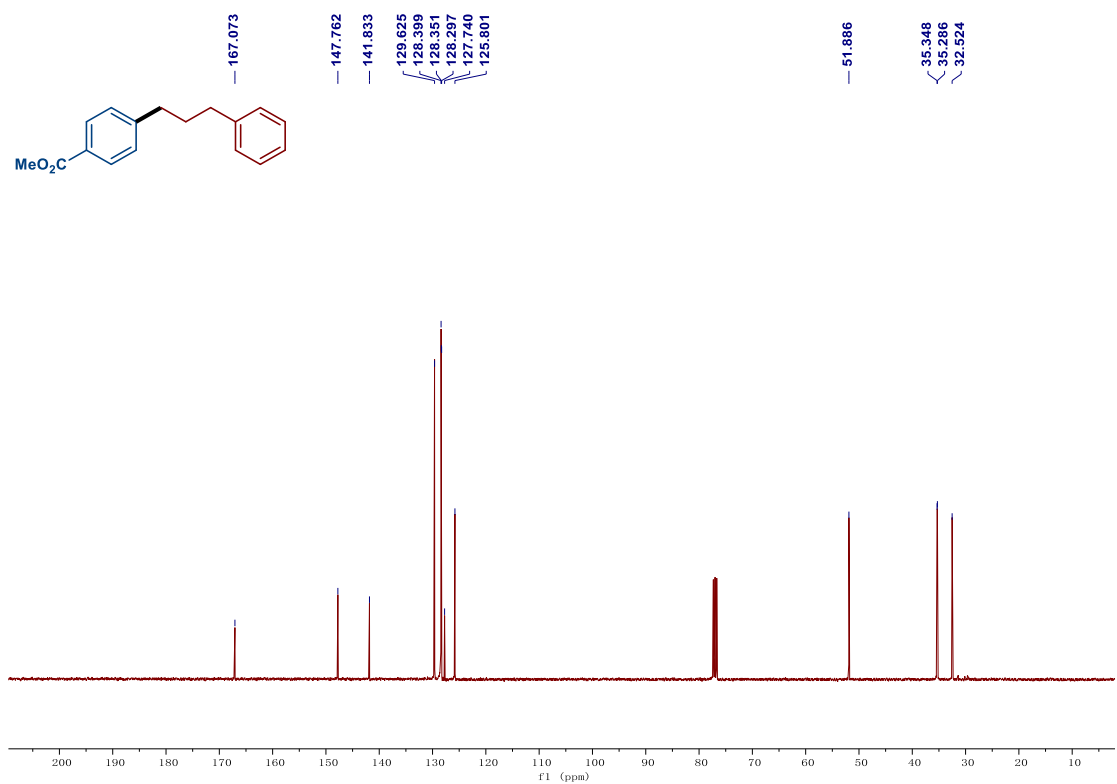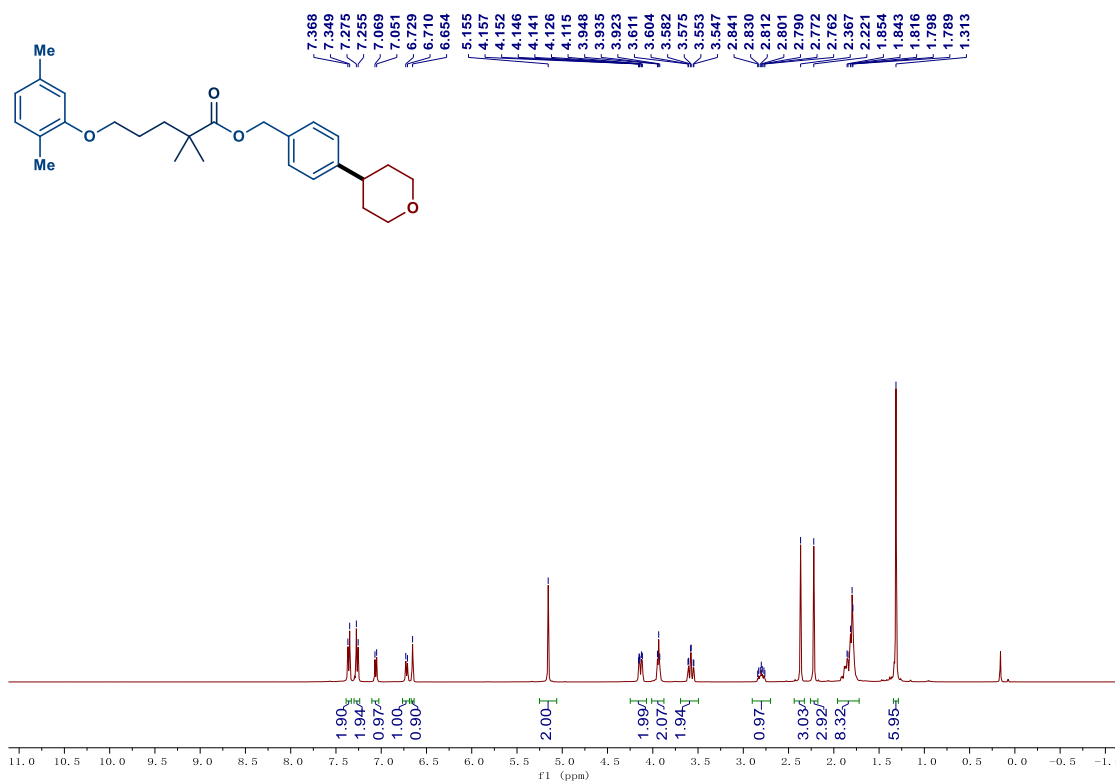

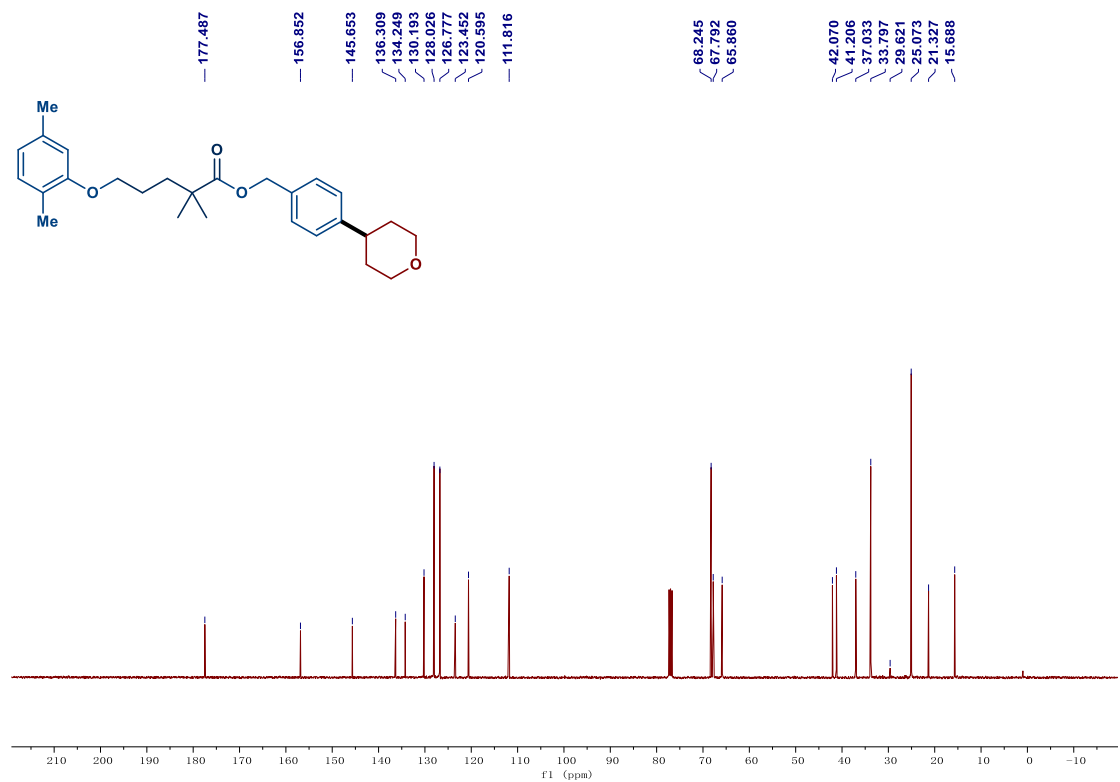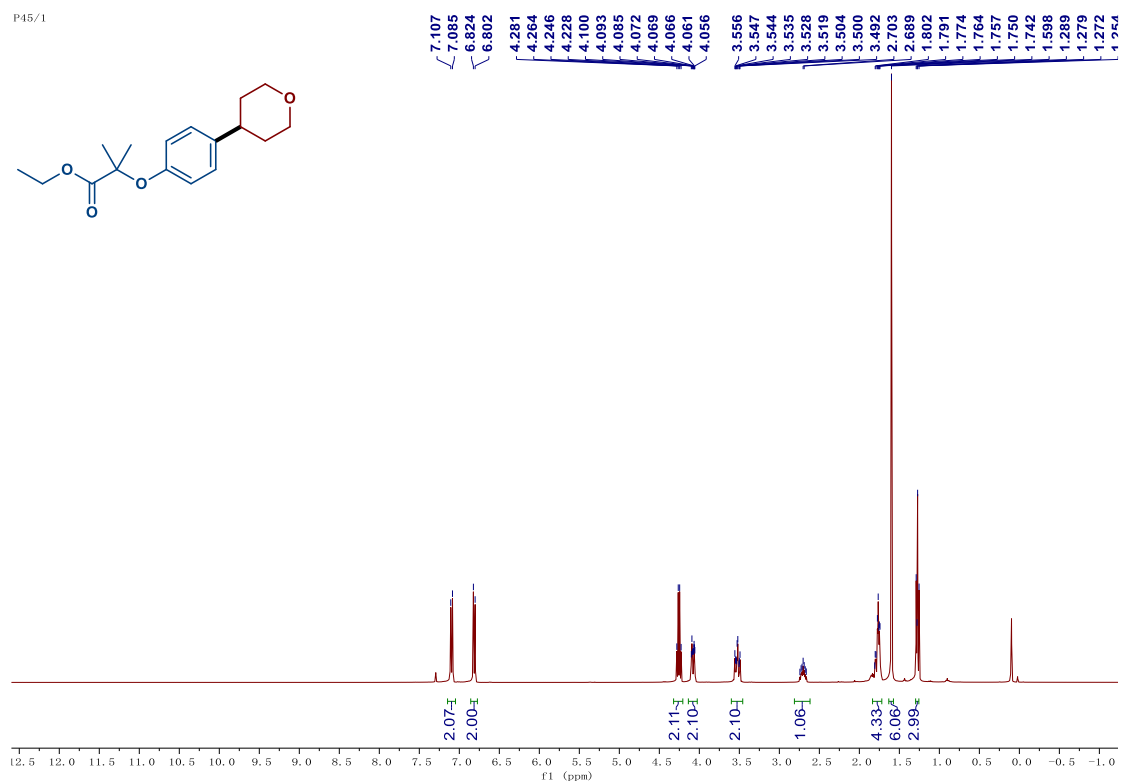

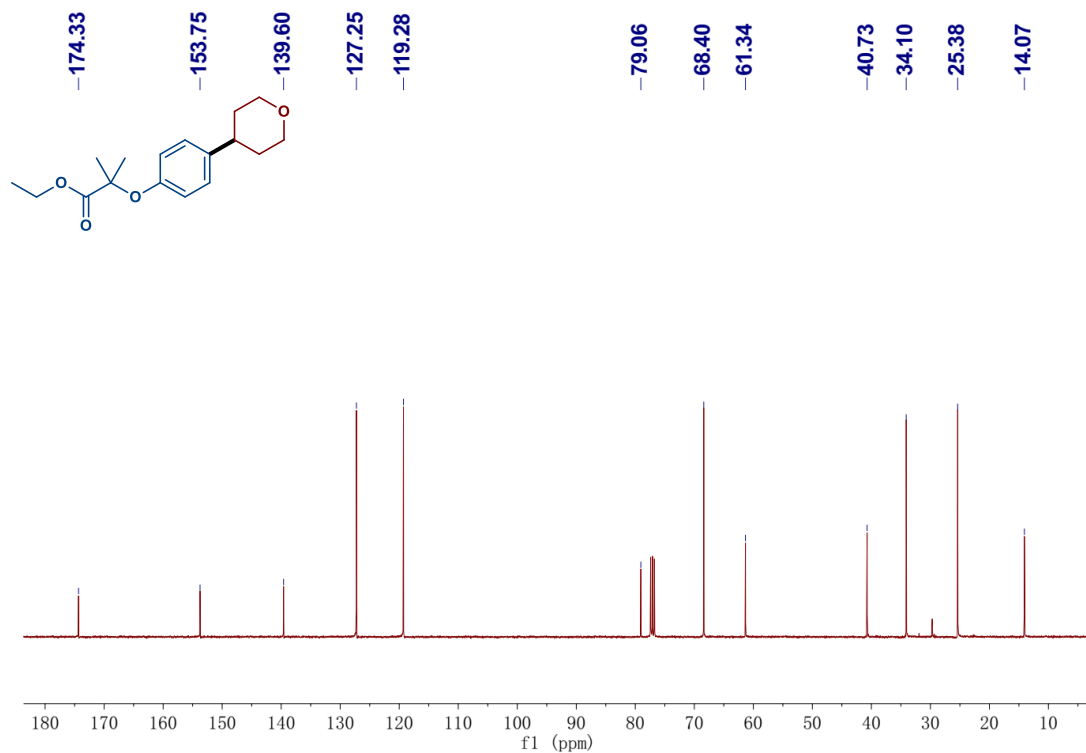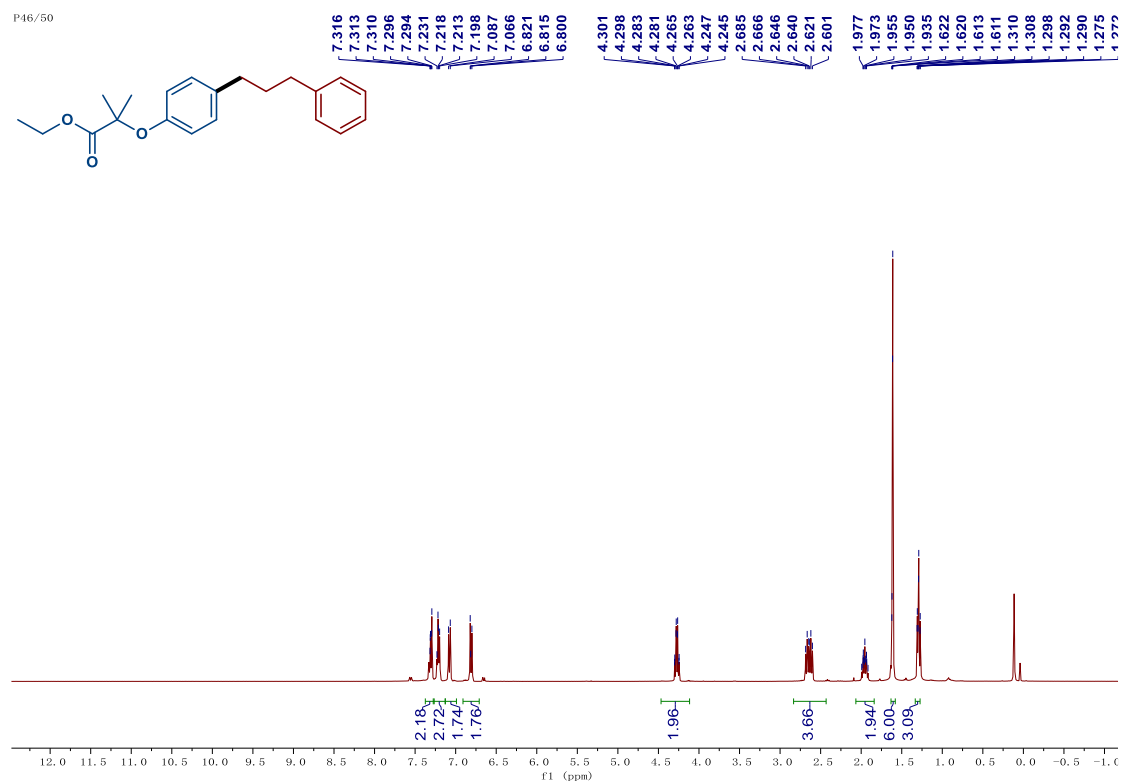



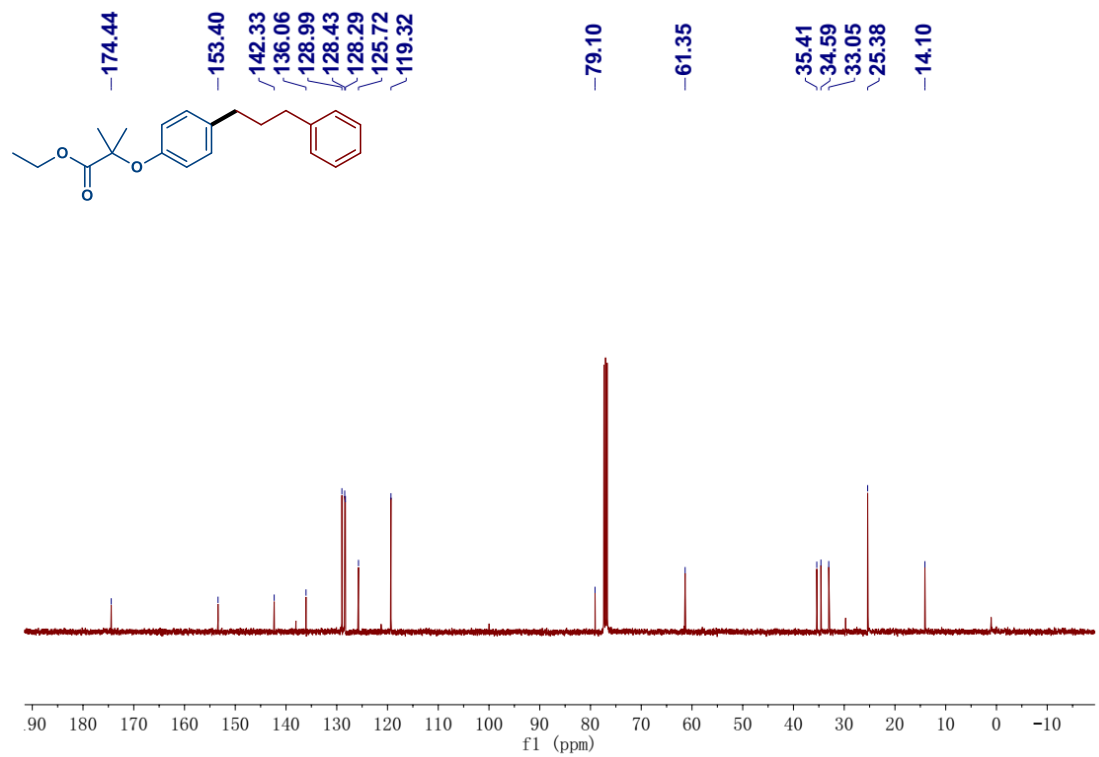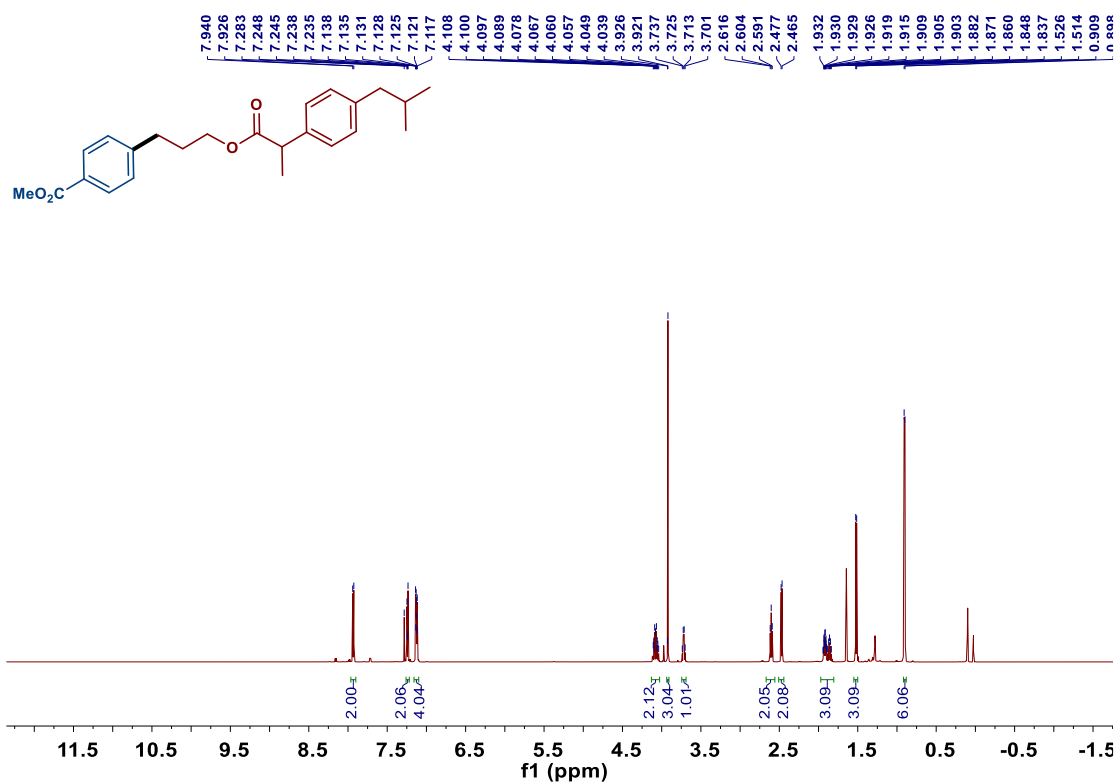

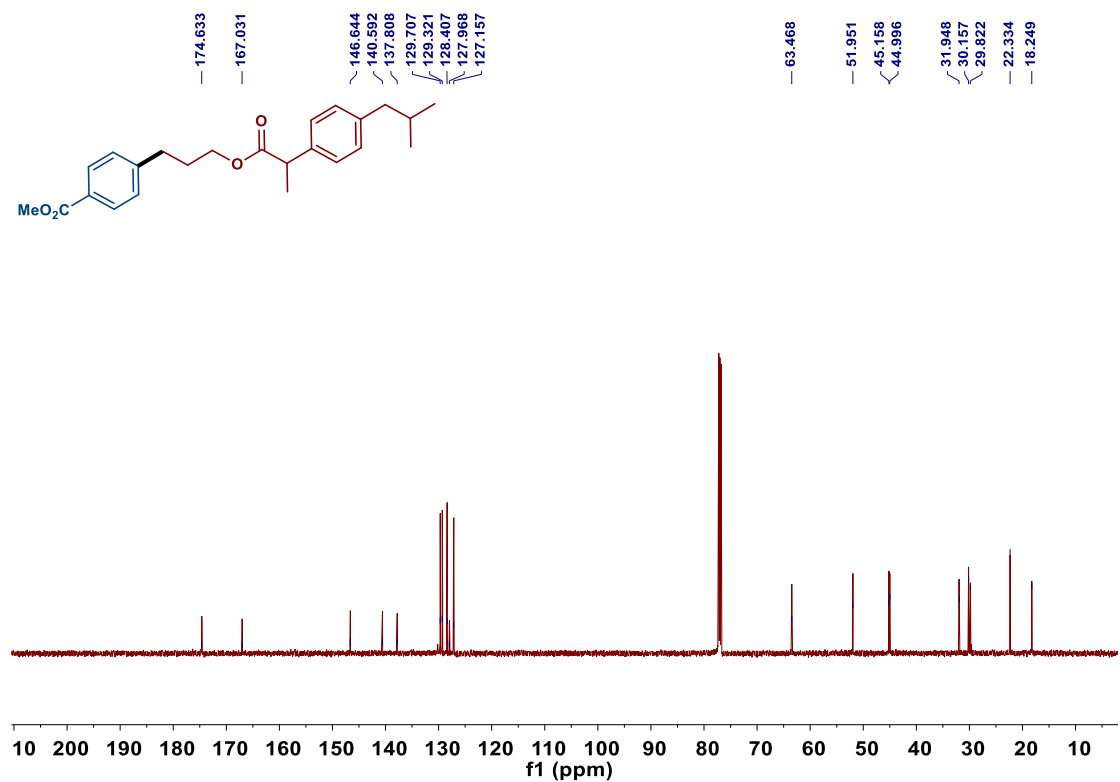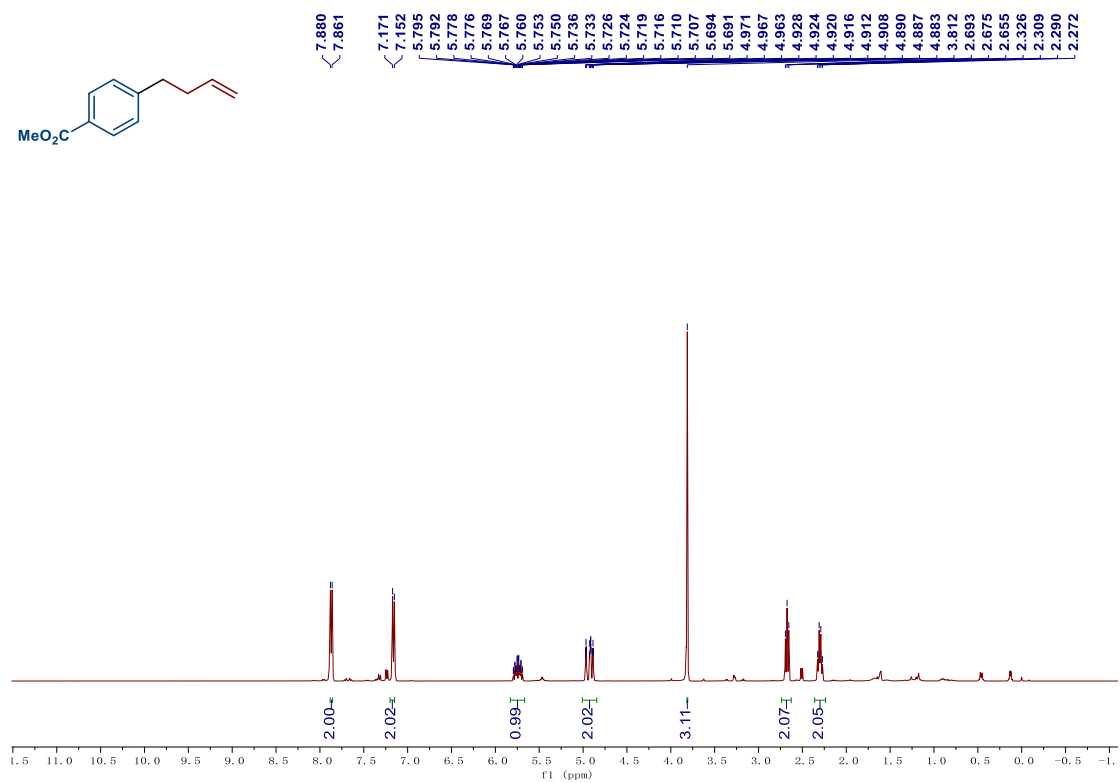

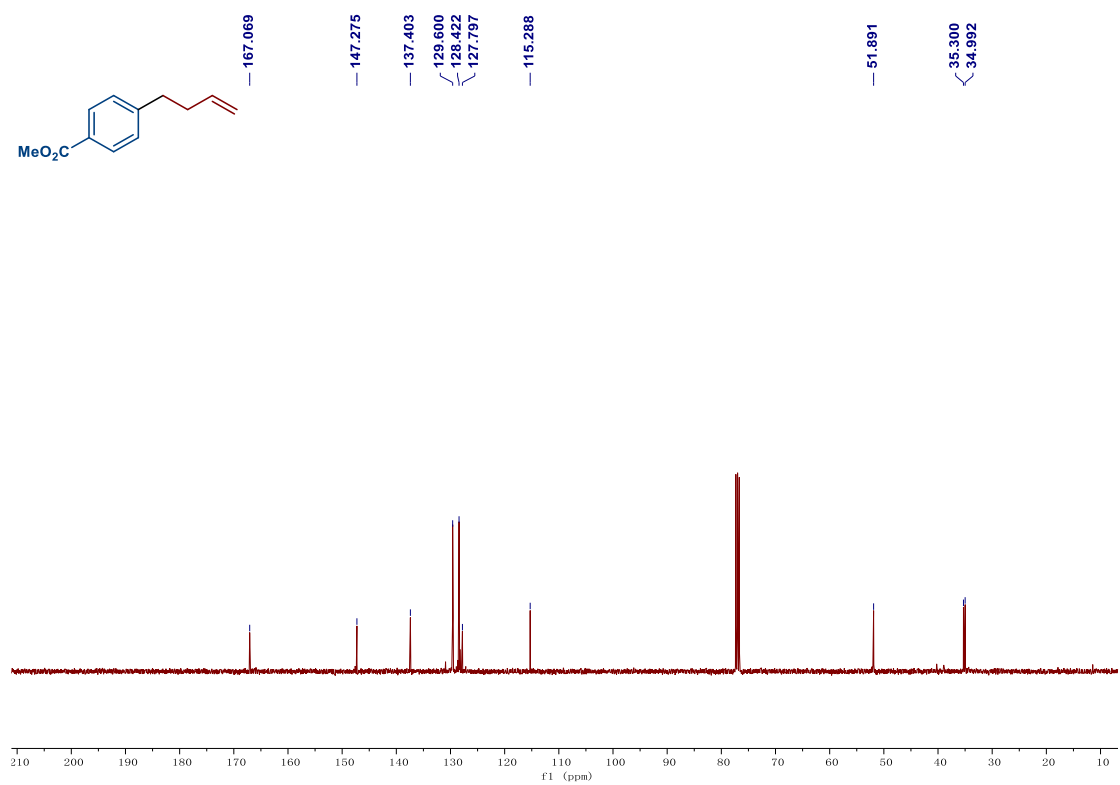

## 10. References

- [1] Campbell P S, Jamieson C, Simpson I, et al. *Chemical Communications*, 2018, 54(1): 46-49.
- [2] Knauber T, Chandrasekaran R, Tucker J W, et al. *Organic Letters*, 2017, 19(24): 6566-6569.
- [3] Watanabe E, Chen Y, May O, et al. *Chemistry-a European Journal*, 2020, 26(1): 186-191.
- [4] Chen H, Hu L, Ji W, et al. *Acs Catalysis*, 2018, 8(11): 10479-10485.
- [5] Hofmayer M S, Hammann J M, Haas D, et al. *Organic Letters*, 2016, 18(24): 6456-6459.
- [6] Martin-Montero R, Reddy Yatham V, Yin H, et al. *Organic Letters*, 2019, 21(8): 2947-2951.
- [7] Abdiaj I, Huck L, Mateo J M, et al. *Angewandte Chemie-International Edition*, 2018, 57(40): 13231-13236.
- [8] Zhang X, Macmillan D W C. *Journal of the American Chemical Society*, 2016, 138(42): 13862-13865.
- [9] Suga T, Shimazu S, Ukaji Y. *Organic Letters*, 2018, 20(17): 5389-5392.
- [10] Toriyama F, Cornella J, Wimmer L, et al. *Journal of the American Chemical Society*, 2016, 138(35): 11132-11135.
- [11] Cao H, Jiang H, Feng H, et al. *Journal of the American Chemical Society*, 2018, 140(47): 16360-16367.
- [12] Peng L, Li Y, Li Y, et al. *Acs Catalysis*, 2018, 8(1): 310-313.
